# Supplementary material for: Reactivity of 5‐(Alkynyl)dibenzothiophenium Salts: Synthesis of Diynes, Vinyl Sulfones, and Phenanthrenes
Source: PubMed Central journal article supplement — European J Org Chem. 2021 May 5;2021(29):4038–48. doi: 10.1002/ejoc.202100323 (PMC8453815; doi:10.1002/ejoc.202100323), 2021-05-05
Supplement: EJOC-2021-4038-s001.pdf [file EJOC-2021-4038-s001.pdf]

# European Journal of Organic Chemistry

Supporting Information

## **Reactivity of 5-(Alkynyl)dibenzothiophenium Salts: Synthesis of Diynes, Vinyl Sulfones, and Phenanthrenes**

Kevin Kafuta, Christian J. Rugen, Tobias Heilmann, Tianshu Liu, Christopher Golz, and  
Manuel Alcarazo\*

---

## Table of Contents

|                                                                              |    |
|------------------------------------------------------------------------------|----|
| 1 Experimental Procedures .....                                              | 2  |
| 1.1 General working methods .....                                            | 2  |
| 1.2 Starting materials.....                                                  | 2  |
| 1.3 General analytical methods.....                                          | 2  |
| 1.4 Synthesis and characterization of the compounds prepared .....           | 4  |
| General Procedure A (GP A) for the synthesis of compounds <b>2a-2p</b> ..... | 4  |
| General Procedure B (GP B) for the synthesis of compounds <b>3a-3h</b> ..... | 9  |
| 2 NMR Spectra.....                                                           | 13 |
| 3 X-Ray crystal structures.....                                              | 76 |
| 4 References.....                                                            | 96 |

# 1 Experimental Procedures

## 1.1 General working methods

All reactions were carried out using pre-dried glassware under nitrogen atmosphere unless otherwise stated. Dry and degassed solvents (THF, dichloromethane, toluene, *n*-pentane, diethyl ether) were obtained with the MBraun Solvent Purification System (MB-SPS-800) or by distillation over the drying agents as indicated below and stored under a protective gas atmosphere. Flash chromatography was either performed on Merck 60 (40–63  $\mu\text{m}$ ) or Macherey-Nagel 60 (40–63  $\mu\text{m}$ ) silica gel. Thin-layer chromatography (TLC) analysis was performed using Merck silica gel 60 F254 TLC plates or polygram SIL G/UV254 from Macherey-Nagel and visualized by UV irradiation and/or phosphomolybdic acid,  $\text{KMnO}_4$  or *p*-anisaldehyde dip.

## 1.2 Starting materials

All commercially available products (Acros Organics, ABCR, Alfa Aesar, Sigma Aldrich, Fluorochem, TCI) were used as received. Compounds **1a**, **1b** and **1c** were synthesized according to literature procedures.<sup>[1,2]</sup>

## 1.3 General analytical methods

**NMR:** spectra were recorded at ambient temperature on Bruker Avance Neo 600, Avance III HD 500, Avance Neo 400, Avance III HD 400, Avance III 400 or Avance III HD 300. Chemical shifts ( $\delta$ ) are reported in ppm and quoted relative to the residual solvent peaks in  $\text{CDCl}_3$  ( $^1\text{H}$ : 7.26 ppm,  $^{13}\text{C}$ : 77.16 ppm),  $\text{CD}_3\text{CN}$  ( $^1\text{H}$ : 1.94 ppm,  $^{13}\text{C}$ : 118.26 ppm) or  $(\text{CD}_3)_2\text{CO}$  ( $^1\text{H}$ : 2.05 ppm,  $^{13}\text{C}$ : 29.45 ppm); coupling constants ( $J$ ) are given in Hertz (Hz).

**HRMS:** Finnigan MAT 95 (70 eV, EI), Finnigan LCQ (ESI) and APEX IV 7T FTICR, Bruker Daltonic (HRMS).

**IR:** Infrared spectra were recorded on JASCO FT/IR-4100, FT/IR-4600 spectrometers and Nicolet FT-7199 and reported in wavenumbers ( $\text{cm}^{-1}$ ).

**GC-MS:** spectra were recorded with GC system 7820A combined with a mass spectrometer Agilent 5977E.

**Preparative HPLC:** was conducted by Interchim Puriflash 4250 with column Zorbax SB-C18.

---

**Single crystal X-ray diffraction analysis:** Data collection was done on two dual source equipped *Bruker D8 Venture* four-circle-diffractometer from *Bruker AXS GmbH*; used X-ray sources: microfocus *I $\mu$ S 2.0* Cu/Mo and microfocus *I $\mu$ S 3.0* Ag/Mo from *Incoatec GmbH* with mirror optics *HELIOS* and single-hole collimator from *Bruker AXS GmbH*; used detector: *Photon III CE14* (Cu/Mo) and *Photon III HE* (Ag/Mo) from *Bruker AXS GmbH*.

Used programs: *APEX3 Suite* (v2018.7-2) for data collection and therein integrated programs *SAINT V8.38A* (Integration) und *SADABS 2016/2* (Absorption correction) from *Bruker AXS GmbH*; structure solution was done with *SHELXT*,<sup>[3]</sup> refinement with *SHELXL-2018/3*<sup>[3]</sup> was used for data finalization and Figures preparation.<sup>[4]</sup> The numbering in Figures does not correspond to the IUPAC rules.

Special Utilities: *SMZ1270* stereomicroscope from *Nikon Metrology GmbH* was used for sample preparation; crystals were mounted on *MicroMounts* or *MicroLoops* from *MiTeGen* in NVH oil. If not otherwise stated, single crystals were obtained by vapor diffusion method using dichloromethane and diethyl ether as solvents.

| Identifier | CCDC    | Identifier                           | CCDC    |
|------------|---------|--------------------------------------|---------|
| <b>2g</b>  | 2068276 | <b>10</b>                            | 2068282 |
| <b>2k</b>  | 2068277 | <b>11</b>                            | 2068283 |
| <b>3e</b>  | 2068278 | <b>11</b> with bromide<br>counterion | 2068284 |
| <b>5a</b>  | 2068279 | <b>24</b>                            | 2068285 |
| <b>6</b>   | 2068280 | <b>28</b>                            | 2068286 |
| <b>8</b>   | 2068281 |                                      |         |



## 1.4 Synthesis and characterization of the compounds prepared:

### 5-([1,1'-Biphenyl]-2-ylethynyl)-5*H*-dibenzo[*b,d*]thiophen-5-ium Trifluoromethanesulfonate (**1d**):

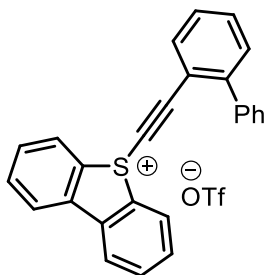

A Schlenk flask was charged with a stirring bar and dibenzo thiophen oxide (DBTO) (1.0 g, 4.99 mmol, 1.0 equiv.). The reaction vessel was purged with nitrogen and anhydrous DCM (40 mL) was added. The reaction mixture was cooled down to  $-50\text{ }^{\circ}\text{C}$  and stirred for 5 min.  $\text{Tf}_2\text{O}$  (0.91 mL, 4.99 mmol, 1.0 equiv.) was added dropwise and the resulting orange suspension was stirred for 10 minutes. Afterwards ([1,1'-biphenyl]-2-ylethynyl)trimethylsilane (1.25 g, 5.99 mmol, 1.2 equiv.) was added in one portion and the reaction mixture was warmed up to room temperature over 15 min. The solvent was evaporated to a small fraction, the crude compound precipitated with diethyl ether (25 mL) and successively washed with diethyl ether (2 x 25 mL). After drying in *vacuo* the salt **1d** (2.14 g, 4.19 mmol, 84%) was obtained as a yellow solid.  **$^1\text{H NMR}$**  (400 MHz,  $\text{CD}_3\text{CN}$ ):  $\delta$  = 8.27 – 8.22 (m, 4H), 7.95 (td,  $J$  = 7.6, 1.0 Hz, 2H), 7.81 – 7.74 (m, 3H), 7.68 – 7.63 (m, 1H), 7.49 – 7.45 (m, 2H), 7.30 – 7.25 (m, 3H), 7.18 – 7.13 (m, 2H) ppm.  **$^{13}\text{C NMR}$**  (101 MHz,  $\text{CD}_3\text{CN}$ ):  $\delta$  = 147.3, 140.1, 139.4, 135.9, 135.5, 134.1, 133.1, 131.3, 130.9, 129.6, 129.32, 129.30, 128.92, 128.90, 125.7, 122.1 (q,  $^1J_{\text{C-F}}$  = 322 Hz), 116.9, 106.1 ppm. **IR** (ATR):  $\tilde{\nu}$  = 3088, 2177, 1447, 1274, 1253, 1224, 1159, 1028, 758, 638  $\text{cm}^{-1}$ . **HRMS** (ESI)  $m/z$  calcd for  $\text{C}_{26}\text{H}_{17}\text{S}^+ [\text{M-OTf}]^+$ ; 361.1046; found: 361.1045.

### General Procedure A (GP A) for the synthesis of compounds 2a-2p

The corresponding 1-alkyne or 1,3 diyne (0.2 mmol, 1.0 equiv.) was dissolved in anhydrous DCM (2 mL, 0.1 M) under inert atmosphere. LiHMDS (0.2 mL of 1 M solution in THF, 0.2 mmol, 1.0 equiv.) was added at  $-78\text{ }^{\circ}\text{C}$  under stirring. The reaction mixture was allowed to warm up to  $0\text{ }^{\circ}\text{C}$  and stirred for 5 min. Successively it was cooled back to  $-78\text{ }^{\circ}\text{C}$ , and the transfer reagent 5-[(triisopropylsilyl)ethynyl]-5*H*-dibenzo[*b,d*]thiophen-5-ium trifluoromethanesulfonate (**1a**) (103 mg, 0.2 mmol, 1.0 equiv.) was added in one portion. The reaction mixture was warmed up to room temperature and stirred for an additional 10 min. The reaction was quenched with water and extracted with EtOAc (3 x 5 mL). After drying over  $\text{Na}_2\text{SO}_4$  or  $\text{MgSO}_4$ , the solvent was evaporated. The product was isolated by column chromatography (pentane) or HPLC.

### Triisopropyl[4-(trifluoromethyl)phenyl]buta-1,3-diyne-1-ylsilane (**2a**):

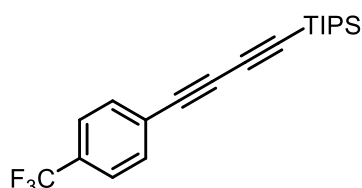

Following GP A, **2a** (26.6 mg, 76  $\mu$ mol, 38%) was obtained as a colorless oil from 1-ethynyl-4-(trifluoromethyl)benzene (34.0 mg, 0.2 mmol, 1 equiv.). **<sup>1</sup>H NMR** (300 MHz, CDCl<sub>3</sub>):  $\delta$  = 7.62 (d,  $J$  = 9.0 Hz, 2H), 7.58 (d,  $J$  = 9.0 Hz, 2H), 1.12 (m, 21H) ppm. **<sup>19</sup>F NMR** (282 MHz, CDCl<sub>3</sub>):  $\delta$  = -63.0 ppm. **<sup>13</sup>C NMR** (125 MHz, CDCl<sub>3</sub>):  $\delta$  = 133.0, 131.1, 125.7, 125.5 (q,  $^3J_{C-F}$  = 3.9 Hz), 122.1, 89.9, 89.1, 77.0, 74.0, 18.7, 11.4 ppm. **IR** (neat):  $\tilde{\nu}$  = 2945, 2865, 2103, 1612, 1462, 1316, 1126, 1064, 841, 594 cm<sup>-1</sup>. **HRMS** (EI)  $m/z$  calcd for C<sub>20</sub>H<sub>25</sub>F<sub>3</sub>Si<sup>+</sup>: 350.1672 [ $M$ ]<sup>+</sup>; found: 350.1675. The compound was reported in the literature; however, its analytical data are not provided.<sup>[5]</sup>

### Triisopropyl[(4-methoxyphenyl)buta-1,3-diyne-1-yl]silane (**2b**):

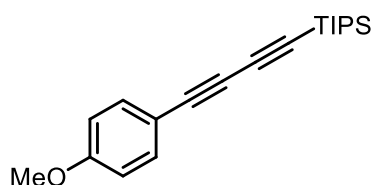

Following GP A, **2b** (17.5 mg, 56  $\mu$ mol, 28%) was obtained as a yellow oil from 1-ethynyl-4-methoxybenzene (26.4 mg, 0.2 mmol, 1 equiv.). **<sup>1</sup>H NMR** (300 MHz, CDCl<sub>3</sub>):  $\delta$  = 7.45 (d,  $J$  = 8.8 Hz, 2H), 6.84 (d,  $J$  = 8.8 Hz, 2H), 3.81 (s, 3H), 1.11 (s, 21H) ppm. **<sup>13</sup>C NMR** (75 MHz, CDCl<sub>3</sub>):  $\delta$  = 160.5, 134.5, 114.3, 113.6, 89.9, 87.2, 75.9, 73.7, 55.5, 18.7, 11.5 ppm. **IR** (neat):  $\tilde{\nu}$  = 2943, 2862, 2199, 2098, 1502, 1298, 1249, 1171, 830, 671 cm<sup>-1</sup>. **HRMS** (EI)  $m/z$  calcd for C<sub>20</sub>H<sub>28</sub>OSi<sup>+</sup> [ $M$ ]<sup>+</sup>: 312.1903; found: 312.1904. Analytical data corresponds to those reported in the literature.<sup>[6]</sup> The yield of **2b** was improved to 52% when 1 equiv. of CuCN was added to the reaction mixture under otherwise identical conditions.

### [(4-Iodophenyl)buta-1,3-diyne-1-yl]triisopropylsilane (**2c**):

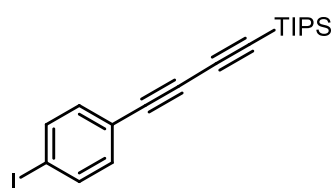

Following GP A, **2c** (58.0 mg, 142  $\mu$ mol, 71%) was obtained as a slightly yellow oil from 1-ethynyl-4-iodobenzene (45.6 mg, 0.2 mmol, 1 equiv.). **<sup>1</sup>H NMR** (300 MHz, CDCl<sub>3</sub>):  $\delta$  = 7.66 (d,  $J$  = 8.7 Hz, 2H), 7.22 (d,  $J$  = 8.7 Hz, 2H), 1.11 (s, 21H) ppm. **<sup>13</sup>C NMR** (125 MHz, CDCl<sub>3</sub>):  $\delta$  = 137.8, 134.1, 121.2, 95.7, 89.4, 89.1, 76.2, 74.7, 18.7, 11.4 ppm. **IR** (neat):  $\tilde{\nu}$  = 2943, 2865, 2204, 2101, 1462, 1002, 879, 815, 656, 601 cm<sup>-1</sup>. **HRMS** (EI)  $m/z$  calcd for C<sub>19</sub>H<sub>25</sub>I<sup>+</sup> [ $M$ ]<sup>+</sup>: 408.0765; found: 408.0761.

### Triisopropyl(thiophen-3-ylbuta-1,3-diyn-1-yl)silane (**2d**):

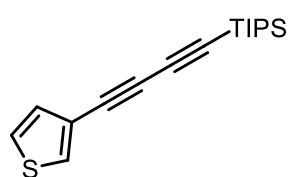

Following GP A, **2d** (28.3 mg, 98  $\mu\text{mol}$ , 49%) was obtained as a slightly brown oil from 3-ethynylthiophene (21.6 mg, 0.2 mmol, 1 equiv.).  **$^1\text{H NMR}$**  (300 MHz,  $\text{CDCl}_3$ )  $\delta$  = 7.58 (d,  $J$  = 4.0 Hz, 1H), 7.26 (dd,  $J$  = 4.9, 3.1 Hz, 1H), 7.15 (d,  $J$  = 6.1 Hz, 1H), 1.11 (s, 21H).  **$^{13}\text{C NMR}$**  (125 MHz,  $\text{CDCl}_3$ ):  $\delta$  = 131.7, 130.4, 125.7, 120.8, 89.6, 87.9, 74.5, 70.9, 18.7, 11.5 ppm. **IR** (neat):  $\tilde{\nu}$  = 3112, 2940, 2862, 2199, 2101, 1459, 994, 861, 778, 659  $\text{cm}^{-1}$ . **HRMS** (EI)  $m/z$  calcd for  $\text{C}_{17}\text{H}_{24}\text{SSi}^+$  [ $M$ ] $^+$ : 288.1363; found: 288.1374. The spectra correspond to the previously published data.<sup>[7]</sup>

### 3-[(Triisopropylsilyl)buta-1,3-diyn-1-yl]pyridine (**2e**):

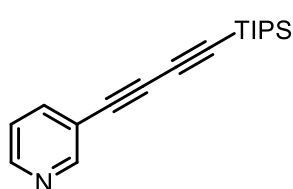

Following GP A, **2e** (35.7 mg, 0.126 mmol, 63%) was obtained as a yellow oil from 3-ethynylpyridine (20.6 mg, 0.2 mmol, 1 equiv.).  **$^1\text{H NMR}$**  (300 MHz,  $\text{CDCl}_3$ ):  $\delta$  = 8.73 (s, 1H), 8.56 (d,  $J$  = 4.2 Hz, 1H), 7.78 (d,  $J$  = 7.9 Hz, 1H), 7.29 – 7.22 (m, 1H), 1.11 (s, 21H).  **$^{13}\text{C NMR}$**  (125 MHz,  $\text{CDCl}_3$ ):  $\delta$  = 153.5, 149.3, 139.6, 123.1, 119.2, 89.9, 89.0, 78.0, 72.2, 18.7, 11.4 ppm. **IR** (neat):  $\tilde{\nu}$  = 2940, 2862, 2204, 2106, 1462, 1404, 996, 882, 659, 602  $\text{cm}^{-1}$ . **HRMS** (EI)  $m/z$  calcd for  $\text{C}_{18}\text{H}_{25}\text{NSi}^+$  [ $M$ ] $^+$ : 283.1751; found: 283.1750.

### (Ferrocenylbuta-1,3-diyn-1-yl)triisopropylsilane (**2f**):

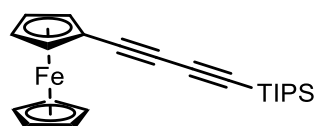

Following GP A, **2f** (28.9 mg, 74  $\mu\text{mol}$ , 37%) was obtained as red crystals from ethynylferrocene (42.0 mg, 0.2 mmol, 1 equiv.).  **$^1\text{H NMR}$**  (300 MHz,  $\text{CDCl}_3$ ):  $\delta$  = 4.50 (q,  $J$  = 1.6 Hz, 2H), 4.27 – 4.22 (m, 7H), 1.11 (m, 21H) ppm.  **$^{13}\text{C NMR}$**  (75 MHz,  $\text{CDCl}_3$ ):  $\delta$  = 90.3, 84.8, 76.0, 72.3, 71.1, 70.2, 69.3, 62.9, 18.6, 11.4 ppm. **IR** (ATR):  $\tilde{\nu}$  = 2943, 2865, 2360, 2202, 1462, 996, 884, 820, 659  $\text{cm}^{-1}$ . **HRMS** (ESI)  $m/z$  calcd for  $\text{C}_{23}\text{H}_{31}\text{FeSi}^+$  [ $M+\text{H}$ ] $^+$ : 391.1539; found: 391.1530. Analytical data corresponds to those reported in the literature.<sup>[8]</sup>

### Triisopropyl(phenylbuta-1,3-diyn-1-yl)silane (**2g**):

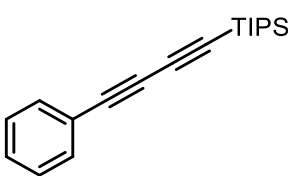

Following GP A, **2g** (29.4 mg, 104  $\mu\text{mol}$ , 52%) was obtained as a colorless oil from ethynylbenzene (20.4 mg, 0.2 mmol, 1 equiv.).  **$^1\text{H NMR}$**  (300 MHz,  $\text{CDCl}_3$ ):  $\delta$  = 7.54 – 7.49 (m, 2H), 7.39 – 7.28 (m, 3H), 1.12 (s, 21H) ppm.  **$^{13}\text{C NMR}$**  (75 MHz,  $\text{CDCl}_3$ ):  $\delta$  = 132.8, 129.4, 128.5, 121.7, 89.6, 88.0, 75.7, 74.8, 18.7, 11.5 ppm. **IR** (neat):  $\tilde{\nu}$  = 2943, 2865, 2202, 2101, 1459, 1017, 879, 755, 677, 602  $\text{cm}^{-1}$ . **HRMS** (EI)  $m/z$  calcd for  $\text{C}_{19}\text{H}_{26}\text{Si}^+$  [ $M$ ] $^+$ : 282.1798; found: 282.1788. Analytical data corresponds to those reported in the literature.<sup>[9]</sup>

### {(4-Bromo-[1,1'-biphenyl]-3-yl)buta-1,3-diyn-1-yl}triisopropylsilane (**2h**):

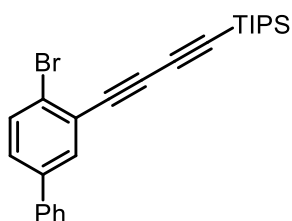

Following GP A, **2h** (50.8 mg, 0.116 mmol, 58%) was obtained as a colorless oil from 4-bromo-3-ethynyl-1,1'-biphenyl (51.4 mg, 0.2 mmol, 1 equiv.). **<sup>1</sup>H NMR** (300 MHz, CDCl<sub>3</sub>): δ = 7.77 (d, *J* = 2.2 Hz, 1H), 7.63 (d, *J* = 8.4 Hz, 1H), 7.56 – 7.51 (m, 2H), 7.47 – 7.37 (m, 4H), 1.13 (s, 21H) ppm. **<sup>13</sup>C NMR** (75 MHz, CDCl<sub>3</sub>): δ = 140.5, 139.0, 133.4, 133.0, 129.07, 129.14, 128.2, 127.0, 125.1, 124.5, 90.1, 89.3, 79.0, 73.8, 18.7, 11.5 ppm. **IR** (neat):  $\tilde{\nu}$  = 2940, 2862, 2098, 1464, 1238, 1014, 882, 760, 695, 607 cm<sup>-1</sup>. **HRMS** (EI) *m/z* calcd for C<sub>25</sub>H<sub>29</sub>BrSi<sup>+</sup> [*M*]<sup>+</sup>: 436.1216; found: 436.1219.

### Triisopropyl[(7-methyl-1,8-diphenylnaphthalen-2-yl)buta-1,3-diyn-1-yl]silane (**2i**):

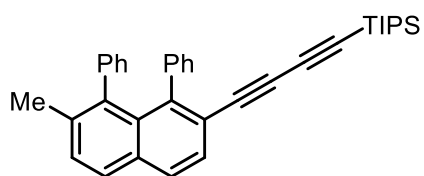

Following GP A, **2i** (39.9 mg, 79.9 μmol, 40%) was obtained as a white solid from 2-ethynyl-7-methyl-1,8-diphenylnaphthalene (63.7 mg, 0.2 mmol, 1 equiv.). **<sup>1</sup>H NMR** (300 MHz, CDCl<sub>3</sub>): δ = 7.79 (d, *J* = 8.5 Hz, 2H), 7.53 (d, *J* = 9.6 Hz, 1H), 7.43 (d, *J* = 8.3 Hz, 1H), 6.92 (d, *J* = 4.4 Hz, 6H), 6.78 (d, *J* = 4.9 Hz, 2H), 6.69 (d, *J* = 5.3 Hz, 2H), 1.99 (s, 3H), 1.02 (s, 21H) ppm. **<sup>13</sup>C NMR** (125 MHz, CDCl<sub>3</sub>): δ = 145.9, 141.2, 141.0, 139.2, 136.7, 133.2, 131.1, 130.6, 130.6, 129.8, 128.0, 127.79, 127.77, 127.3, 126.9, 126.0, 125.7, 121.7, 89.7, 88.2, 78.5, 76.1, 21.6, 18.5, 11.3 ppm. **IR** (ATR):  $\tilde{\nu}$  = 2925, 2851, 2360, 2339, 1735, 1646, 1464, 1173, 1036, 697 cm<sup>-1</sup>. **HRMS** (EI) *m/z* calcd for C<sub>36</sub>H<sub>38</sub>Si<sup>+</sup> [*M*]<sup>+</sup>: 498.2737; found: 498.2754.

### Methyl 3,4,5-Trimethoxy-2'-[(triisopropylsilyl)buta-1,3-diyn-1-yl]-[1,1'-biphenyl]-2-carboxylate (**2j**):

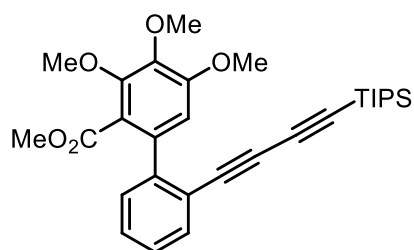

Following GP A, **2j** (65.9 mg, 0.130 mmol, 65%) was obtained as white crystals from methyl 2'-ethynyl-3,4,5-trimethoxy-[1,1'-biphenyl]-2-carboxylate (65.3 mg, 0.2 mmol, 1 equiv.). **<sup>1</sup>H NMR** (300 MHz, CDCl<sub>3</sub>): δ = 7.59 (d, *J* = 9.3 Hz, 1H), 7.38 – 7.25 (m, 3H), 6.86 (s, 1H), 3.97 (s, 3H), 3.92 (s, 3H), 3.91 (s, 3H), 3.58 (s, 3H), 1.07 (s, 21H) ppm. **<sup>13</sup>C NMR** (75 MHz, CDCl<sub>3</sub>): δ = 167.5, 154.1, 151.8, 143.8, 141.9, 134.4, 134.1, 129.3, 129.0, 127.6, 121.6, 120.6, 110.4, 89.7, 88.6, 78.3, 74.7, 62.2, 61.1, 56.3, 52.1, 18.7, 11.4 ppm. **IR** (ATR):  $\tilde{\nu}$  = 2943, 2688, 2361, 2340, 1733, 1459, 1113, 1030, 878, 756 cm<sup>-1</sup>. **HRMS** (ESI) *m/z* calcd for C<sub>30</sub>H<sub>39</sub>O<sub>5</sub>Si<sup>+</sup> [*M*+H]<sup>+</sup>: 507.2561; found: 507.2558.

### Triisopropyl((4-nitrophenyl)buta-1,3-diyn-1-yl)silane (2k):

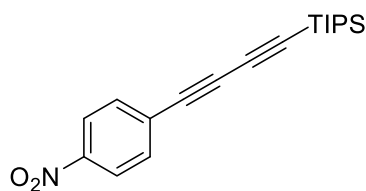

Following GP A, **2k** (49.3 mg, 0.151 mmol, 75%) was obtained as an orange solid from 1-ethynyl-4-nitrobenzene (29.4 mg, 0.2 mmol, 1 equiv.). **<sup>1</sup>H NMR** (300 MHz, CDCl<sub>3</sub>): δ = 8.22–8.17 (m, 2H), 7.67 – 7.62 (m, 2H), 1.12 (s, 21H) ppm. **<sup>13</sup>C NMR** (101 MHz, CDCl<sub>3</sub>): δ = 147.7, 133.6, 128.8, 123.8, 92.0, 88.8, 79.6, 73.3, 18.7, 11.4 ppm. **IR** (ATR):  $\tilde{\nu}$  = 2943, 2863, 2100, 1592, 1519, 1459, 1341, 851, 654, 604 cm<sup>-1</sup>. **HRMS** (EI+) *m/z* calcd for C<sub>19</sub>H<sub>25</sub>O<sub>2</sub>Si<sup>+</sup> [*M*]<sup>+</sup>: 327.1649; found: 327.1646. The analytical data corresponds to those reported in the literature.<sup>[10]</sup>

### 4-((triisopropylsilyl)buta-1,3-diyn-1-yl)benzotrile (2l):

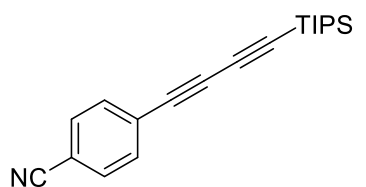

Following GP A, **2l** (43.3 mg, 0.141 mmol, 70%) was obtained as an orange solid from 4-ethynylbenzotrile (25.4 mg, 0.2 mmol, 1 equiv.). **<sup>1</sup>H NMR** (300 MHz, CDCl<sub>3</sub>): δ = 7.63 – 7.56 (m, 4H), 1.12 (s, 21H) ppm. **<sup>13</sup>C NMR** (101 MHz, CDCl<sub>3</sub>): δ = 133.3, 132.2, 126.8, 118.4, 112.6, 91.4, 88.8, 78.9, 73.5, 18.7, 11.4. ppm. **IR** (ATR):  $\tilde{\nu}$  = 2944, 2865, 2226, 2099, 1602, 1481, 1004, 995, 882, 664 cm<sup>-1</sup>. **HRMS** (ESI) *m/z* calcd for C<sub>20</sub>H<sub>29</sub>N<sub>2</sub>Si<sup>+</sup> [*M*+NH<sub>4</sub>]<sup>+</sup>: 325.2095; found: 325.2094. The analytical data corresponds to those reported in the literature.<sup>[10]</sup>

### Triisopropyl(phenylhexa-1,3,5-triyn-1-yl)silane (2m):

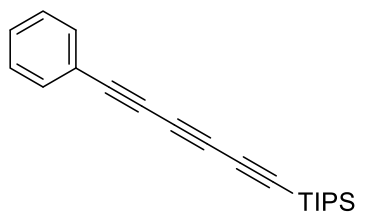

Following GP A, **2m** (44.8 mg, 0.146 mmol, 73%) was obtained as a yellow liquid from (buta-1,3-diyn-1-yl)benzene (25.2 mg, 0.2 mmol, 1 equiv.). **<sup>1</sup>H NMR** (300 MHz, CDCl<sub>3</sub>): δ = 7.55 – 7.48 (m, 2H), 7.42 – 7.28 (m, 3H), 1.10 (s, 21H) ppm. **<sup>13</sup>C NMR** (101 MHz, CDCl<sub>3</sub>): δ = 133.2, 129.9, 128.6, 121.1, 89.9, 86.9, 76.7, 74.5, 67.4, 60.7, 18.7, 11.5 ppm. **IR** (ATR):  $\tilde{\nu}$  = 2942, 2865, 2174, 2073, 1461, 881, 753, 675 cm<sup>-1</sup>. **HRMS** (EI): *m/z* calcd for C<sub>21</sub>H<sub>26</sub>Si<sup>+</sup> [*M*]<sup>+</sup>: 306.1798; found: 306.1796. The analytical data corresponds to those reported in the literature.<sup>[11]</sup>

### Triisopropyl[(4-methoxyphenyl)hexa-1,3,5-triyn-1-yl]silane (2n):

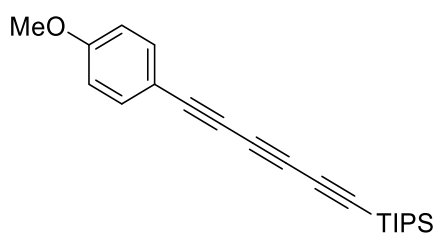

Following GP A, **2n** (53.2 mg, 0.158 mmol, 79%) was obtained as a yellow liquid from 1-(buta-1,3-diyn-1-yl)-4-methoxybenzene (31.2 mg, 0.2 mmol, 1 equiv.). **<sup>1</sup>H NMR** (400 MHz, CDCl<sub>3</sub>): δ = 7.46 (d, *J* = 9.1 Hz, 2H), 6.85 (d, *J* = 9.1 Hz, 2H), 3.82 (s, 3H), 1.09 (s, 21H) ppm. **<sup>13</sup>C NMR** (101 MHz,

CDCl<sub>3</sub>):  $\delta$  = 160.9, 134.9, 134.6, 114.4, 112.8, 90.1, 86.5, 73.5, 67.1, 61.1, 55.5, 18.7, 11.4 ppm. **IR** (ATR):  $\tilde{\nu}$  = 2941, 2861, 2177, 2065, 1480, 1266, 1132, 1003, 851, 643 cm<sup>-1</sup>. **HRMS** (EI):  $m/z$  calcd for C<sub>22</sub>H<sub>28</sub>OSi<sup>+</sup> [ $M$ ]<sup>+</sup>: 336.1904; found: 336.1904. The analytical data corresponds to those reported in the literature.<sup>[11]</sup>

#### Triisopropyl(*p*-tolylhexa-1,3,5-triyn-1-yl)silane (**2o**):

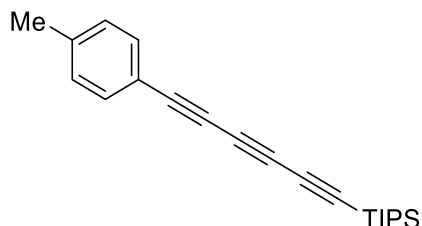

Following GP A, **2o** (30.8 mg, 96  $\mu$ mol, 48%) was obtained as a yellow liquid from 1-(buta-1,3-diyn-1-yl)-4-methylbenzene (28.0 mg, 0.2 mmol, 1 equiv.). **<sup>1</sup>H NMR** (300 MHz, CDCl<sub>3</sub>):  $\delta$  = 7.42 (d,  $J$  = 8.4 Hz, 2H), 7.13 (d,  $J$  = 8.4 Hz, 2H), 2.37 (s, 3H), 1.10 (s, 21H) ppm. **<sup>13</sup>C NMR** (101 MHz, CDCl<sub>3</sub>):  $\delta$  = 140.4, 133.2, 129.4, 117.9, 90.0, 86.6, 77.0, 74.0, 67.2, 60.9, 21.8, 18.7, 11.4 ppm. **IR** (ATR):  $\tilde{\nu}$  = 2941, 2861, 2177, 2065, 1480, 1266, 1132, 1003, 851, 643 cm<sup>-1</sup>. **HRMS** (EI):  $m/z$  calcd for C<sub>22</sub>H<sub>28</sub>Si<sup>+</sup> [ $M$ ]<sup>+</sup>: 320.1955; found: 320.1954. The analytical data corresponds to those reported in the literature.<sup>[13]</sup>

#### [(4-Butylphenyl)hexa-1,3,5-triyn-1-yl]triisopropylsilane (**2p**):

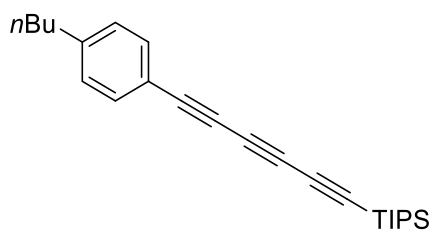

Following GP A, **2p** (37.0 mg, 0.102 mmol, 51%) was obtained as a yellow liquid from 1-(buta-1,3-diyn-1-yl)-4-butylbenzene (36.5 mg, 0.2 mmol, 1 equiv.). **<sup>1</sup>H NMR** (600 MHz, CDCl<sub>3</sub>):  $\delta$  = 7.42 (d,  $J$  = 8.3 Hz, 2H), 7.14 (d,  $J$  = 8.3 Hz, 2H), 2.63 – 2.58 (m, 2H), 1.61 – 1.56 (m, 2H), 1.33 (dt,  $J$  = 14.7, 7.4 Hz, 2H), 1.09 (d,  $J$  = 2.7 Hz, 21H), 0.92 (t,  $J$  = 7.4 Hz, 3H) ppm. **<sup>13</sup>C NMR** (151 MHz, CDCl<sub>3</sub>):  $\delta$  = 145.4, 133.2, 128.8, 118.0, 90.0, 86.6, 77.0, 74.0, 67.2, 61.0, 35.9, 33.4, 22.4, 18.7, 14.1, 11.4 ppm. **IR** (ATR):  $\tilde{\nu}$  = 2941, 2859, 2183, 2067, 1511, 1463, 1137, 996, 881, 667 cm<sup>-1</sup>. **HRMS** (EI):  $m/z$  calcd for C<sub>25</sub>H<sub>34</sub>Si<sup>+</sup> [ $M$ ]<sup>+</sup>: 362.2424; found: 362.2816.

#### General Procedure B (GP B) for the synthesis of compounds 3a-3h

Transfer reagent **1a** (103 mg, 0.2 mmol, 1 equiv.) and the corresponding sulfinate (0.24 mmol, 1.2 equiv.) were dissolved in DCM:MeOH 1:1 (5 mL), and the reaction mixture was stirred for 30 min at ambient temperature on air. The reaction was monitored by TLC. Upon completion of the reaction, pentane (5 mL) was added, and the reaction mixture was transferred directly to a pre-wetted column (hexanes). The pure product was obtained by column chromatography (hexanes).

### Triisopropyl[(phenylsulfonyl)ethynyl]silane (**3a**):

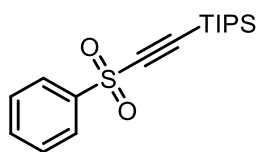

Following GP B, **3a** (57.4 mg 0.178 mmol, 89%) was obtained as a colorless oil from sodium benzenesulfinate (39.4 mg, 0.24 mmol, 1.2 equiv.). **<sup>1</sup>H NMR** (300 MHz, CDCl<sub>3</sub>): δ = 8.05 – 8.00 (m, 2H), 7.67 (t, *J* = 7.4 Hz, 1H), 7.57 (t, *J* = 7.5 Hz, 2H), 1.16 – 1.00 (m, 21H) ppm. **<sup>13</sup>C NMR** (75 MHz, CDCl<sub>3</sub>): δ = 142.3, 134.2, 129.4, 127.3, 101.1, 100.8, 18.5, 11.0 ppm. **IR** (neat):  $\tilde{\nu}$  = 2946, 2865, 2360, 2119, 1738, 1335, 1159, 784, 681, 570 cm<sup>-1</sup>. **HRMS** (EI) *m/z* calcd for C<sub>17</sub>H<sub>26</sub>O<sub>2</sub>SSi<sup>+</sup> [*M*]<sup>+</sup>: 322.1417; found: 322.1422. Analytical data corresponds to those reported in the literature.<sup>[14]</sup>

### Triisopropyl(tosylethynyl)silane (**3b**):

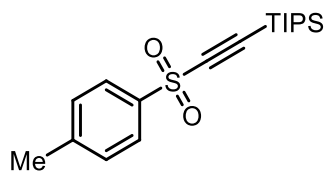

Following GP B, **3b** (57.9 mg, 0.172 mmol, 86%) was obtained as a white solid from sodium 4-methylbenzenesulfinate (42.8 mg, 0.24 mmol, 1.2 equiv.). **<sup>1</sup>H NMR** (400 MHz, CDCl<sub>3</sub>): 7.88 (d, *J* = 8.9 Hz, 2H), 7.35 (d, *J* = 9.3 Hz, 2H), 2.45 (s, 3H), 1.13 – 1.00 (m, 21H) ppm. **<sup>13</sup>C NMR** (101 MHz, CDCl<sub>3</sub>): δ = 145.3, 139.3, 130.0, 127.4, 101.0, 100.2, 21.8, 18.4, 11.0 ppm. **IR** (ATR):  $\tilde{\nu}$  = 2942, 2867, 2118, 1461, 1333, 1159, 1084, 771, 670, 545 cm<sup>-1</sup>. **HRMS** (ESI) *m/z* calcd for C<sub>18</sub>H<sub>28</sub>NaO<sub>2</sub>SSi<sup>+</sup> [*M*+Na]<sup>+</sup>: 359.1472; found: 359.1470. Analytical data corresponds to those reported in the literature.<sup>[12]</sup>

### {[(4-Fluorophenyl)sulfonyl]ethynyl}triisopropylsilane (**3c**):

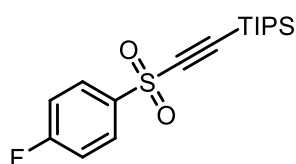

Following GP B, **3c** (58.6 mg, 0.172 mmol, 86%) was obtained as a colorless oil from sodium 4-fluorobenzenesulfinate (43.7 mg, 0.24 mmol, 1.2 equiv.). **<sup>1</sup>H NMR** (400 MHz, CDCl<sub>3</sub>): δ = 8.03 (dd, *J* = 9.1, 5.0 Hz, 2H), 7.28 – 7.21 (m, 2H), 1.12 – 1.01 (m, 21H) ppm. **<sup>19</sup>F NMR** (376 MHz, CDCl<sub>3</sub>): δ = -102.45 ppm. **<sup>13</sup>C NMR** (101 MHz, CDCl<sub>3</sub>): δ = 167.1 (d, *J* = 257.5 Hz), 138.3 (d, *J* = 3.3 Hz), 130.3 (d, *J* = 9.9 Hz), 116.8 (d, *J* = 22.8 Hz), 101.3, 100.6, 18.4, 11.0 ppm. **IR** (neat):  $\tilde{\nu}$  = 2947, 2864, 2360, 2118, 1592, 1341, 1151, 777, 670, 545 cm<sup>-1</sup>. **HRMS** (ESI) *m/z* calcd for C<sub>17</sub>H<sub>25</sub>FNaO<sub>2</sub>SSi<sup>+</sup> [*M*+Na]<sup>+</sup>: 363.1221; found: 363.1221. Analytical data corresponds to those reported in the literature.<sup>[14]</sup>

### {[(4-Bromophenyl)sulfonyl]ethynyl}triisopropylsilane (**3d**):

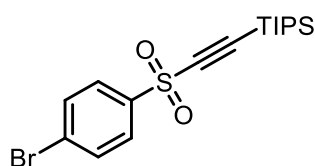

Following GP B, **3d** (66.6 mg, 0.166 mmol, 83%) was obtained as a white solid from sodium 4-bromobenzenesulfinate (58.3 mg, 0.24 mmol, 1.2 equiv.). **<sup>1</sup>H NMR** (400 MHz, CDCl<sub>3</sub>) δ = 7.87 (d, *J* = 8.8 Hz, 2H), 7.71 (d, *J* = 8.8 Hz, 2H), 1.13 – 1.01 (m, 21H) ppm. **<sup>13</sup>C NMR** (101 MHz,

CDCl<sub>3</sub>):  $\delta$  = 141.2, 132.7, 129.6, 128.9, 101.8, 100.3, 18.5, 11.0 ppm. **IR** (ATR):  $\tilde{\nu}$  = 2945, 2867, 2360, 2337, 2121, 1571, 1464, 1338, 1159, 788 cm<sup>-1</sup>. **HRMS** (ESI)  $m/z$  calcd for C<sub>17</sub>H<sub>29</sub>BrNO<sub>2</sub>SSi<sup>+</sup> [ $M$ +NH<sub>4</sub>]<sup>+</sup>: 418.0866; found: 418.0864. Analytical data corresponds to those reported in the literature.<sup>[14]</sup>

#### [[4-Chlorophenyl)sulfonyl]ethynyl]triisopropylsilane (3e):

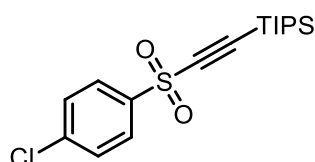

Following GP B, **3e** (32.8 mg, 91.8  $\mu$ mol, 46%) was obtained as a white solid from sodium 4-chlorobenzenesulfinate (47.7 mg, 0.24 mmol, 1.2 equiv.). **<sup>1</sup>H NMR** (400 MHz, CDCl<sub>3</sub>):  $\delta$  = 7.94 (d,  $J$  = 8.9 Hz, 2H), 7.54 (d,  $J$  = 8.9 Hz, 2H), 1.13 – 1.01 (m, 21H) ppm. **<sup>13</sup>C NMR** (101 MHz, CDCl<sub>3</sub>):  $\delta$  = 141.0, 140.7, 129.7, 128.8, 101.7, 100.4, 18.4, 11.0 ppm. **IR** (ATR):  $\tilde{\nu}$  = 2947, 2867, 1734, 1458, 1341, 1165, 1030, 791, 681, 670 cm<sup>-1</sup>. **HRMS** (ESI)  $m/z$  calcd for C<sub>17</sub>H<sub>25</sub>ClNaO<sub>2</sub>SSi<sup>+</sup> [ $M$ +Na]<sup>+</sup>: 379.0925; found: 379.0920. Analytical data corresponds to those reported in the literature.<sup>[14]</sup>

#### Triisopropyl[(thiophen-2-ylsulfonyl)ethynyl]silane (3f):

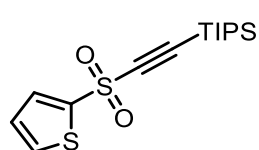

Following GP B, **3f** (60.4 mg, 183.8  $\mu$ mol, 92%) was obtained as a white solid from sodium thiophene-2-sulfinate (40.8 mg, 0.24 mmol, 1.2 equiv.). **<sup>1</sup>H NMR** (400 MHz, CDCl<sub>3</sub>):  $\delta$  = 7.80 (dd,  $J$  = 3.8, 1.4 Hz, 1H), 7.75 (dd,  $J$  = 5.0, 1.4 Hz, 1H), 7.14 (dd,  $J$  = 5.0, 3.8 Hz, 1H), 1.14 – 1.02 (m, 21H) ppm. **<sup>13</sup>C NMR** (101 MHz, CDCl<sub>3</sub>):  $\delta$  = 143.3, 134.9, 134.2, 127.9, 100.9, 100.8, 18.4, 11.0 ppm. **IR** (ATR):  $\tilde{\nu}$  = 2121, 1461, 1402, 1341, 1153, 1012, 884, 785, 670, 574 cm<sup>-1</sup>. **HRMS** (ESI)  $m/z$  calcd for C<sub>15</sub>H<sub>25</sub>O<sub>2</sub>S<sub>2</sub>Si<sup>+</sup> [ $M$ +H]<sup>+</sup>: 329.1060; found: 329.1063. Analytical data corresponds to those reported in the literature.<sup>[15]</sup>

#### Triisopropyl{[(2-nitrophenyl)sulfonyl]ethynyl}silane (3g):

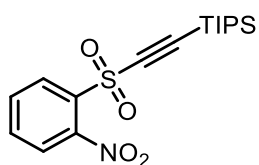

Following GP B, **3g** (36.0 mg, 97.9  $\mu$ mol, 49%) was obtained as an orange solid from sodium 2-nitrobenzenesulfinate (50.2 mg, 0.24 mmol, 1.2 equiv.). **<sup>1</sup>H NMR** (400 MHz, CDCl<sub>3</sub>)  $\delta$  = 8.33 – 8.26 (m, 1H), 7.99 – 7.92 (m, 1H), 7.87 – 7.79 (m, 2H), 1.20 – 1.06 (m, 21H) ppm. **<sup>13</sup>C NMR** (101 MHz, CDCl<sub>3</sub>):  $\delta$  = 148.3, 135.4, 135.2, 133.1, 131.0, 125.5, 102.6, 99.3, 18.5, 11.1 ppm. **IR** (ATR):  $\tilde{\nu}$  = 2948, 2867, 2360, 2340, 2124, 1542, 1336, 1159, 803, 575 cm<sup>-1</sup>. **HRMS** (ESI)  $m/z$  calcd for C<sub>17</sub>H<sub>26</sub>NO<sub>4</sub>SSi<sup>+</sup> [ $M$ +H]<sup>+</sup>: 368.1346; found: 368.1342.



---

### Triisopropyl((methylsulfonyl)ethynyl)silane (**3h**):

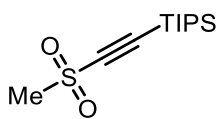

Following GP B, **3h** (30.5 mg, 0.117 mmol, 59%) was obtained as an orange solid from sodium methylsulfinate (24.5 mg, 0.24 mmol, 1.2 equiv.). **<sup>1</sup>H NMR** (300 MHz, CDCl<sub>3</sub>): δ = 3.21 (s, 3H), 1.20 – 1.10 (m, 21H) ppm. **<sup>13</sup>C NMR** (101 MHz, CDCl<sub>3</sub>): δ = 99.8, 98.4, 77.5, 76.8, 47.0, 18.5, 11.0 ppm. **IR** (ATR):  $\tilde{\nu}$  = 2945, 2867, 2125, 1463, 1331, 1151, 961, 882, 791, 748 cm<sup>-1</sup>. **HRMS** (ESI) *m/z* calcd for C<sub>12</sub>H<sub>28</sub>N<sub>2</sub>O<sub>4</sub>SSi<sup>+</sup> [*M*+NH<sub>4</sub>]<sup>+</sup>: 278.1605; found: 278.1605.

### Alternative synthesis of 1,2,3-Trimethoxy-6-tosyl-5,6-dihydro-4*H*-dibenzo[*de,g*]quinoline (**26**):

A flame dried Schlenk flask was charged with salt **25** (20 mg, 25 μmol, 1.0 equiv.) then dry THF (1 mL) was added. To the solution KH (3.0 mg, 75 μmol, 3.0 equiv.) and catalytic amounts of KO<sup>t</sup>Bu (few crystals) were added and the reaction mixture was stirred at roomtemperature for 2 h. The reaction was quenched with MeOH (0.5 mL) and water (3 mL) and the aqueous phase was extracted with EtOAc (2 × 5 mL). The combined organic phases were washed with brine (5 mL), dried over Na<sub>2</sub>SO<sub>4</sub> and concentrated under reduced pressure. Purification by Isolera flash chromatography (hexane/EtOAc, 5% → 40%) gave product **26** (2.0 mg, 4.3 μmol, 17%) as a brownish oil.

## 2 NMR Spectra

$^1\text{H}$  NMR (300 MHz,  $\text{CDCl}_3$ ) of **2a**

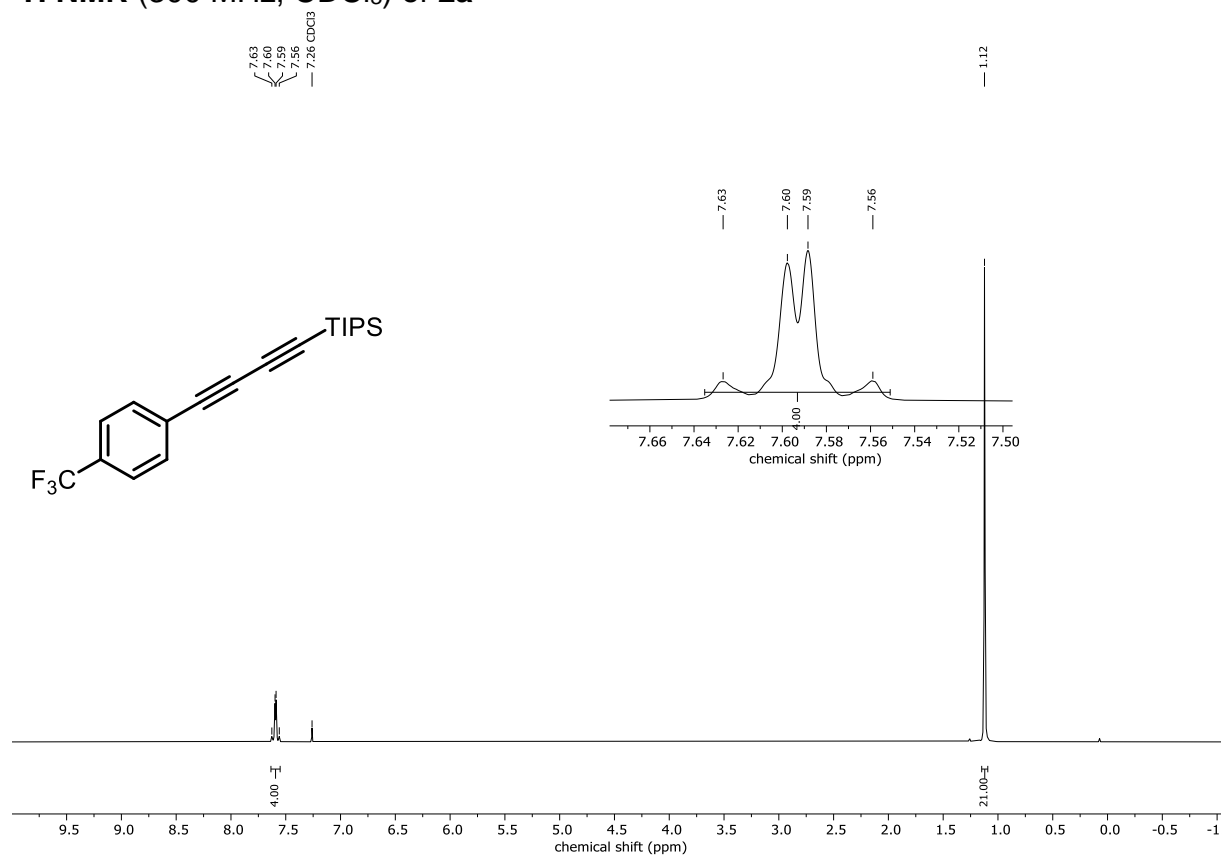

$^{19}\text{F}$  NMR (282 MHz,  $\text{CDCl}_3$ ) of **2a**

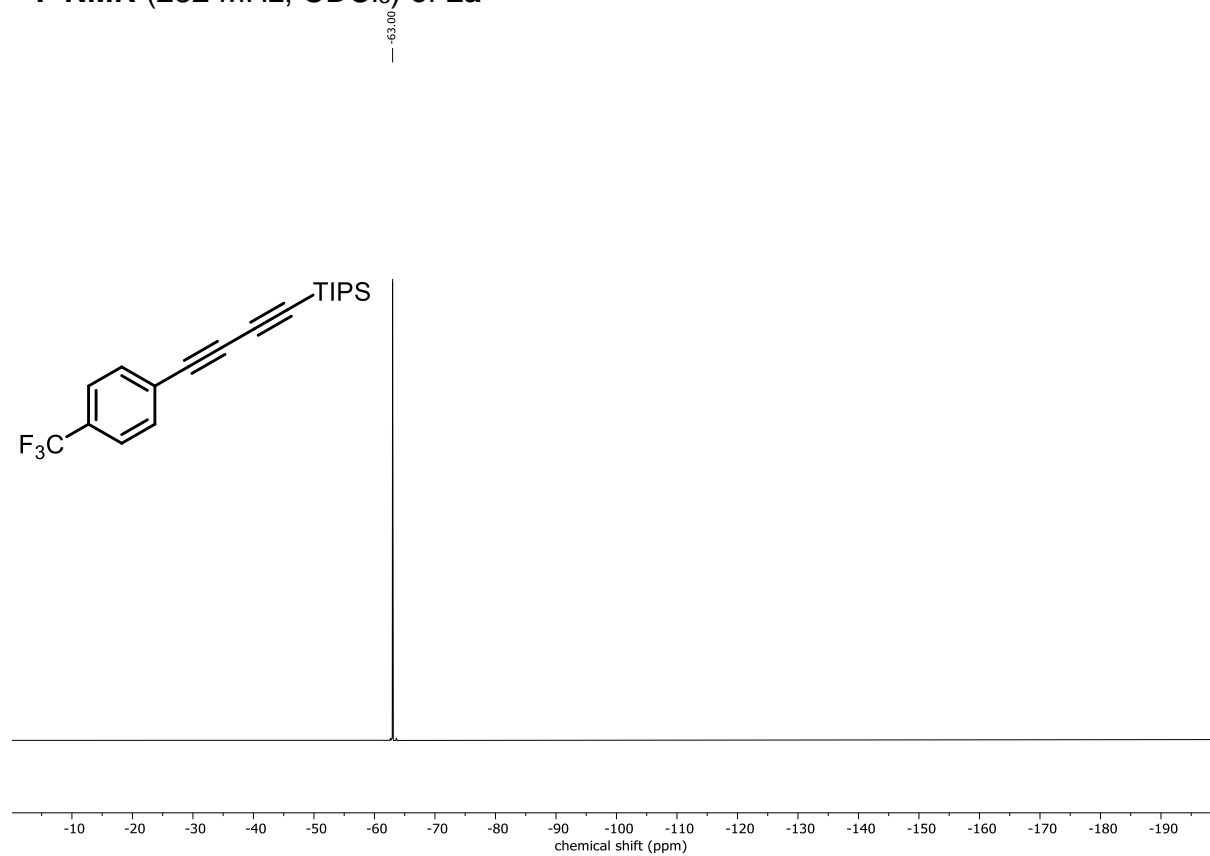

**<sup>13</sup>C NMR (75 MHz, CDCl<sub>3</sub>) of 2a**

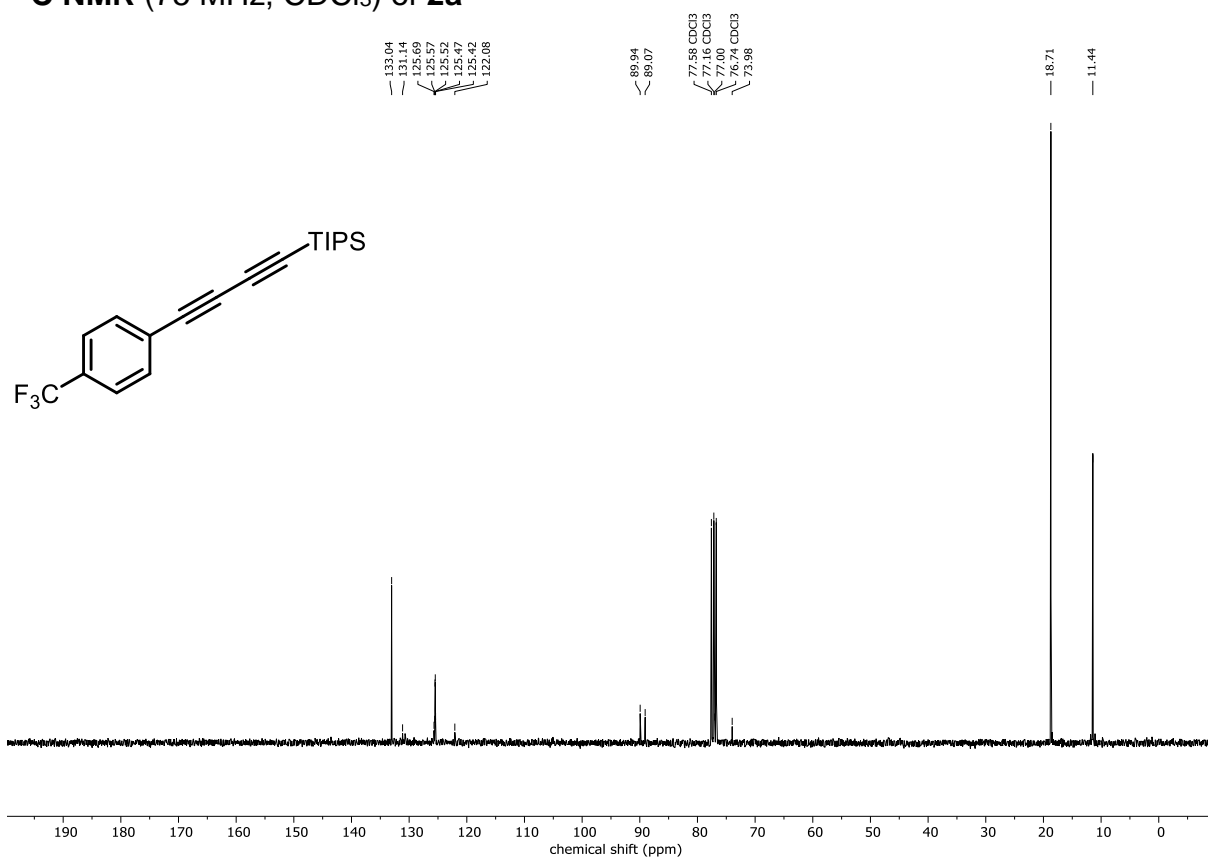

# $^1\text{H}$ NMR (300 MHz, $\text{CDCl}_3$ ) of **2b**

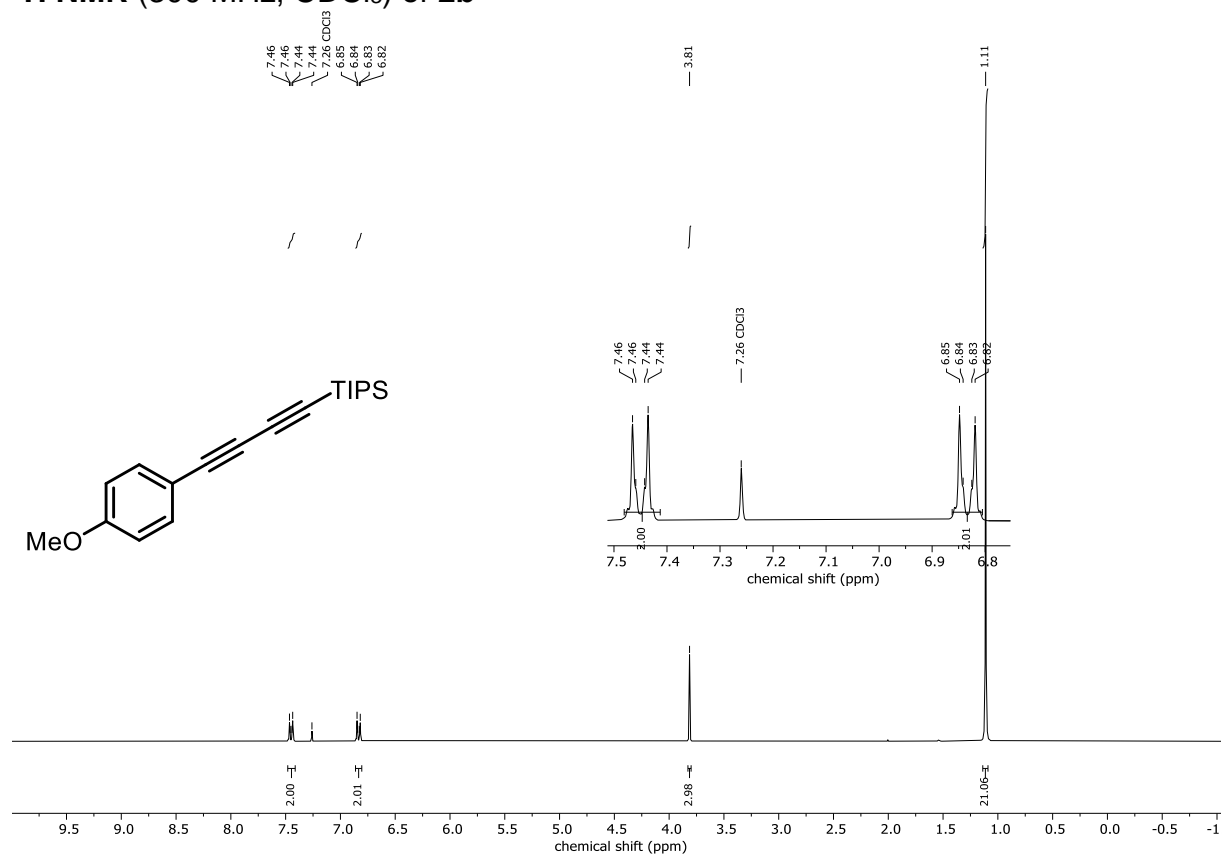

# $^{13}\text{C}$ NMR (75 MHz, $\text{CDCl}_3$ ) of **2b**

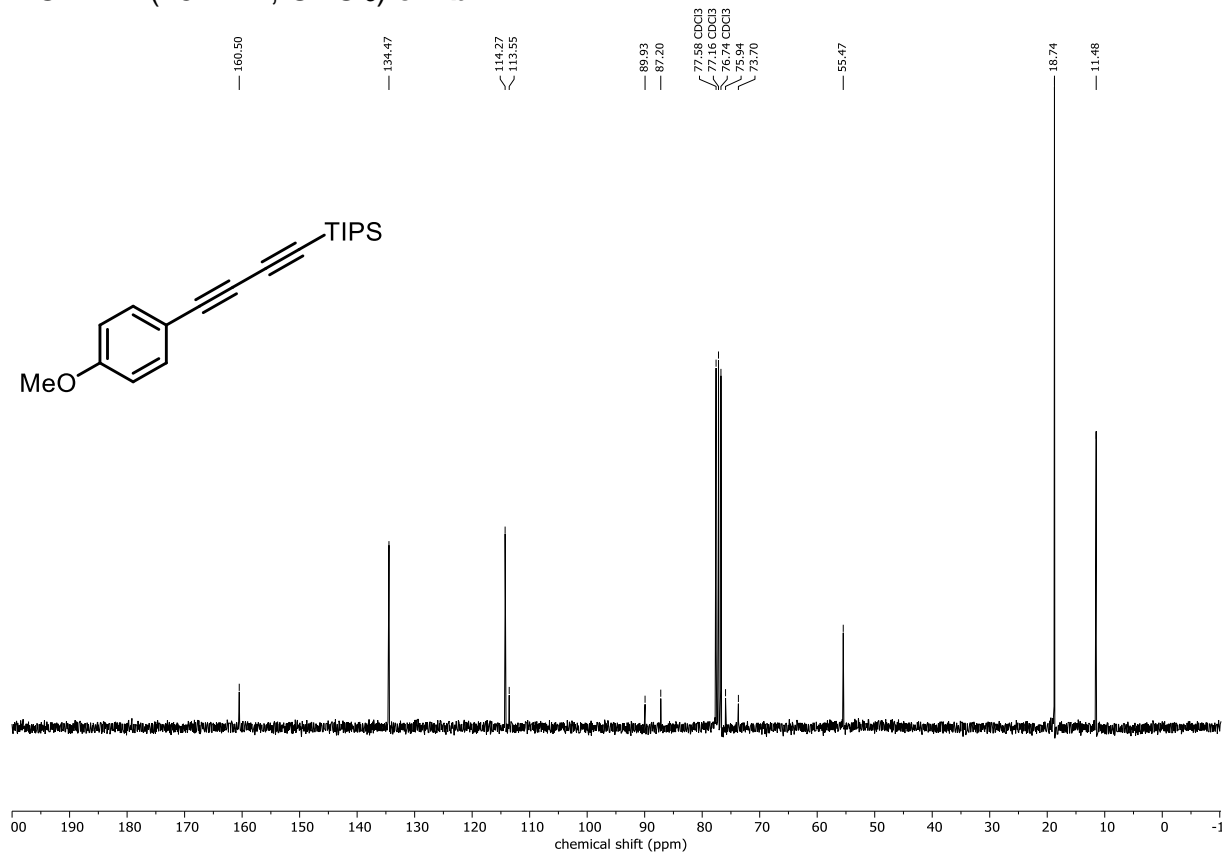

**<sup>1</sup>H NMR (300 MHz, CDCl<sub>3</sub>) of 2c**

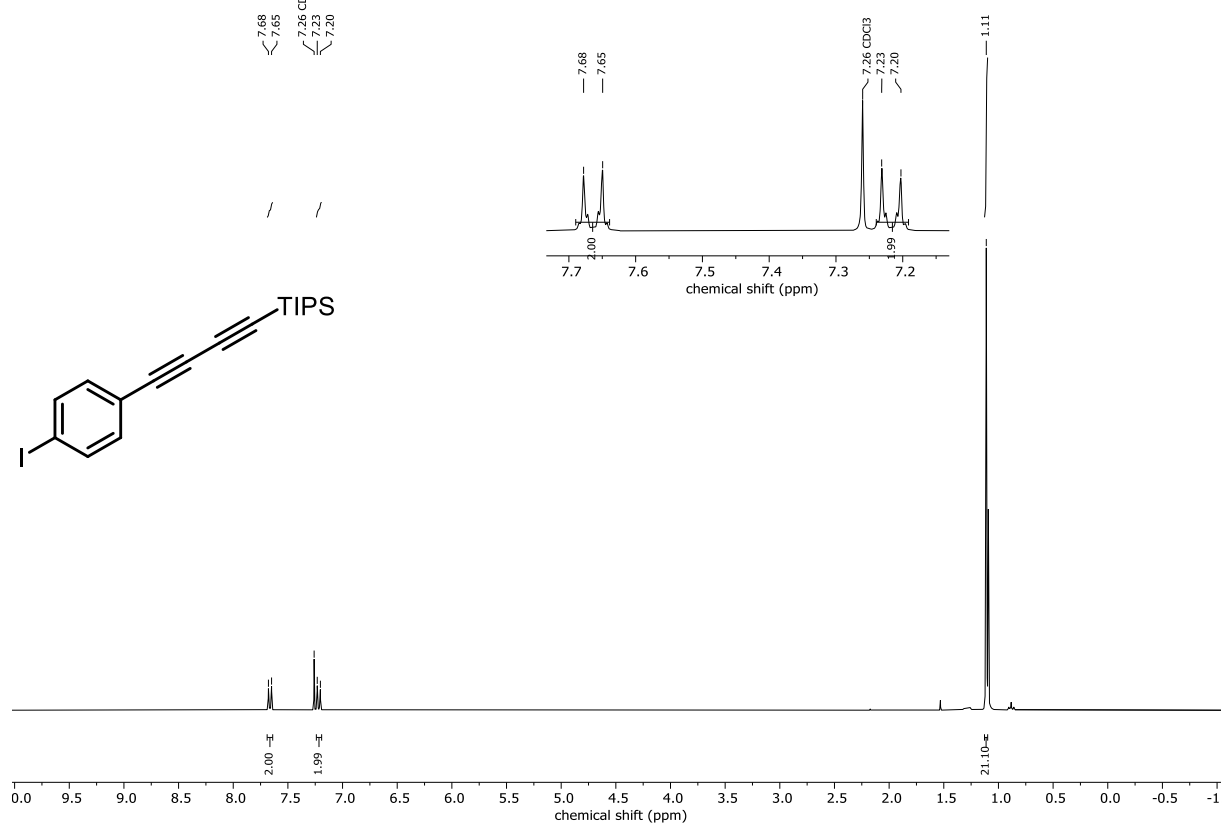

**<sup>13</sup>C NMR (75 MHz, CDCl<sub>3</sub>) of 2c**

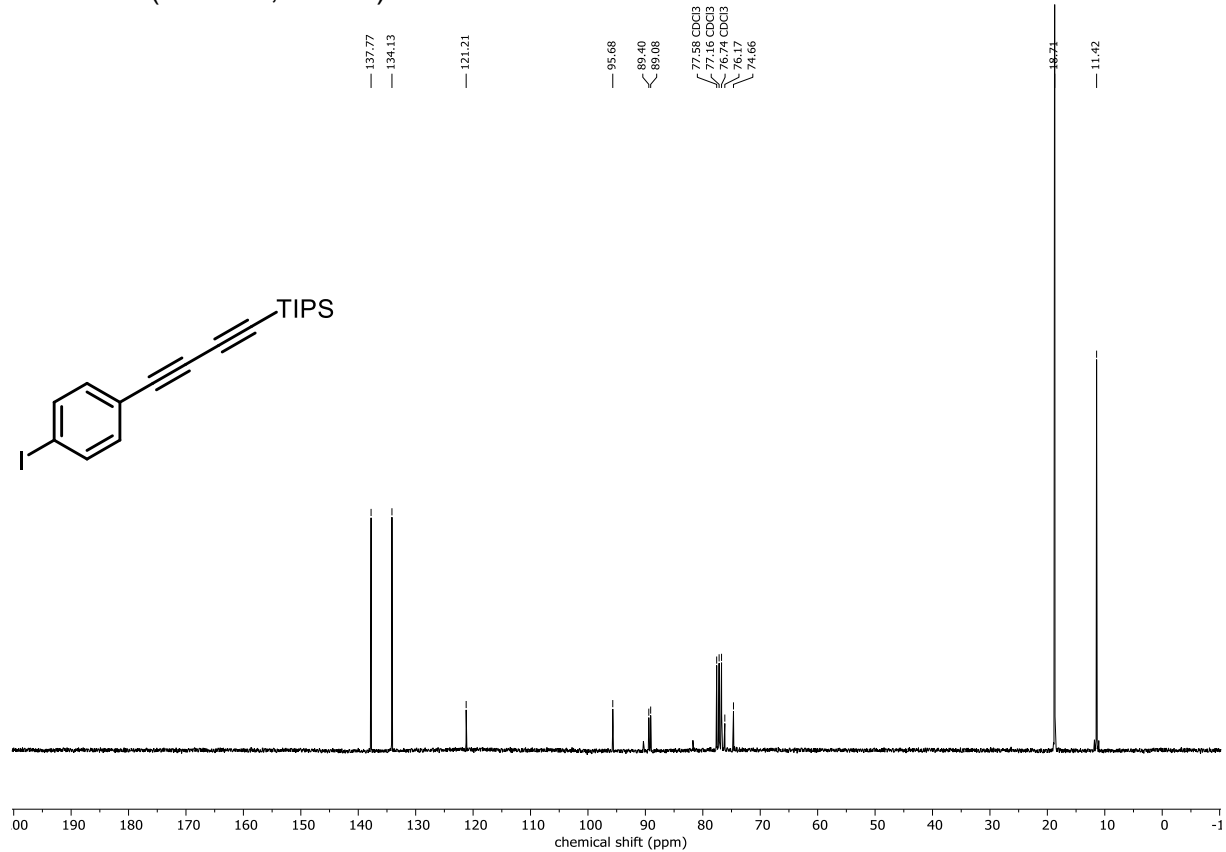

# <sup>1</sup>H NMR (300 MHz, CDCl<sub>3</sub>) of 2d

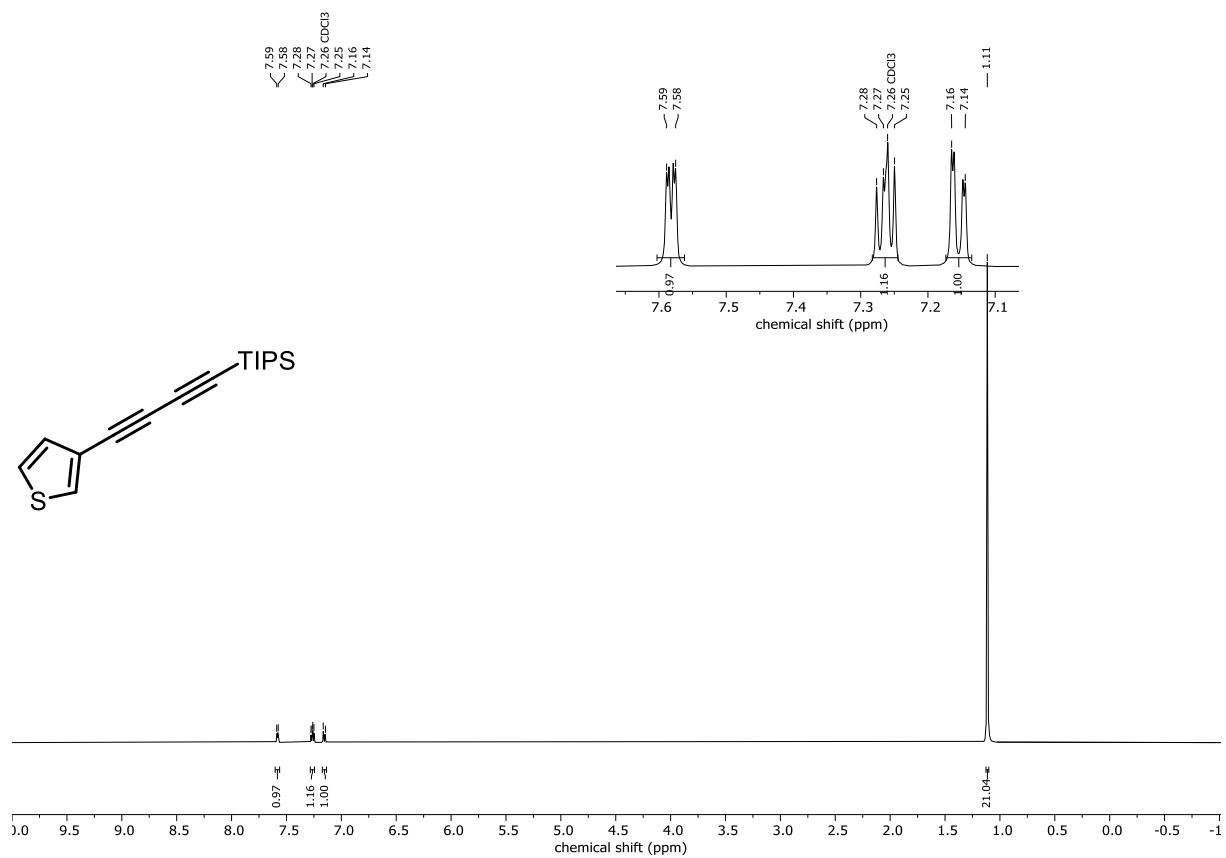

# <sup>13</sup>C NMR (75 MHz, CDCl<sub>3</sub>) of 2d

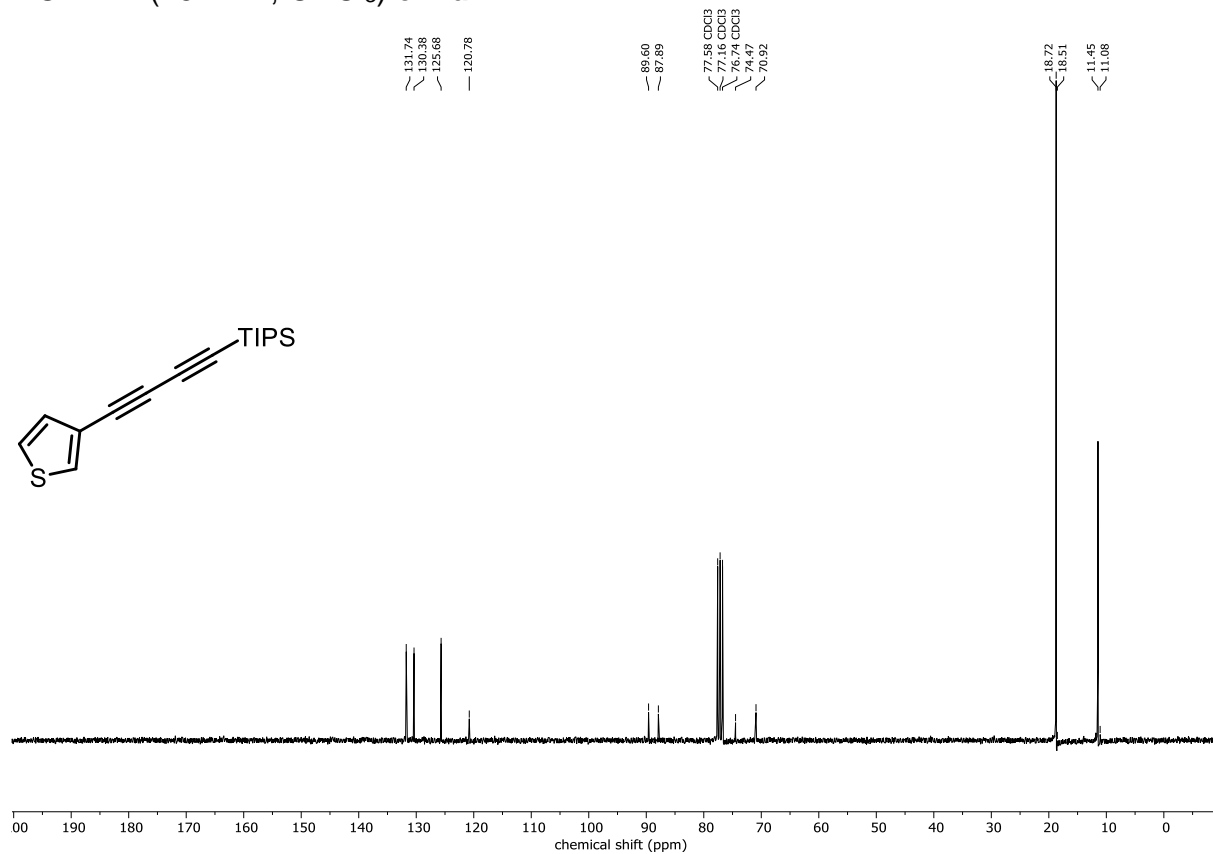

# <sup>1</sup>H NMR (300 MHz, CDCl<sub>3</sub>) of 2e

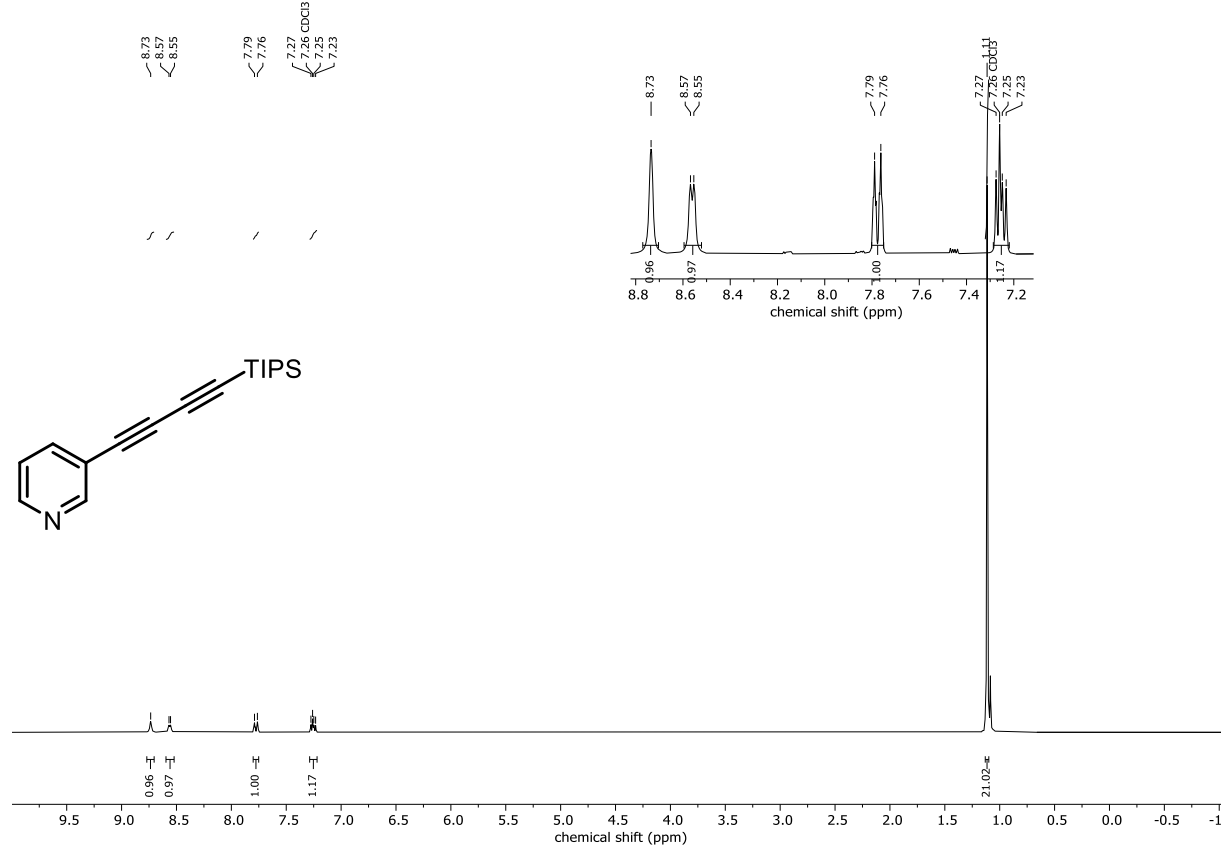

# <sup>13</sup>C NMR (75 MHz, CDCl<sub>3</sub>) of 2e

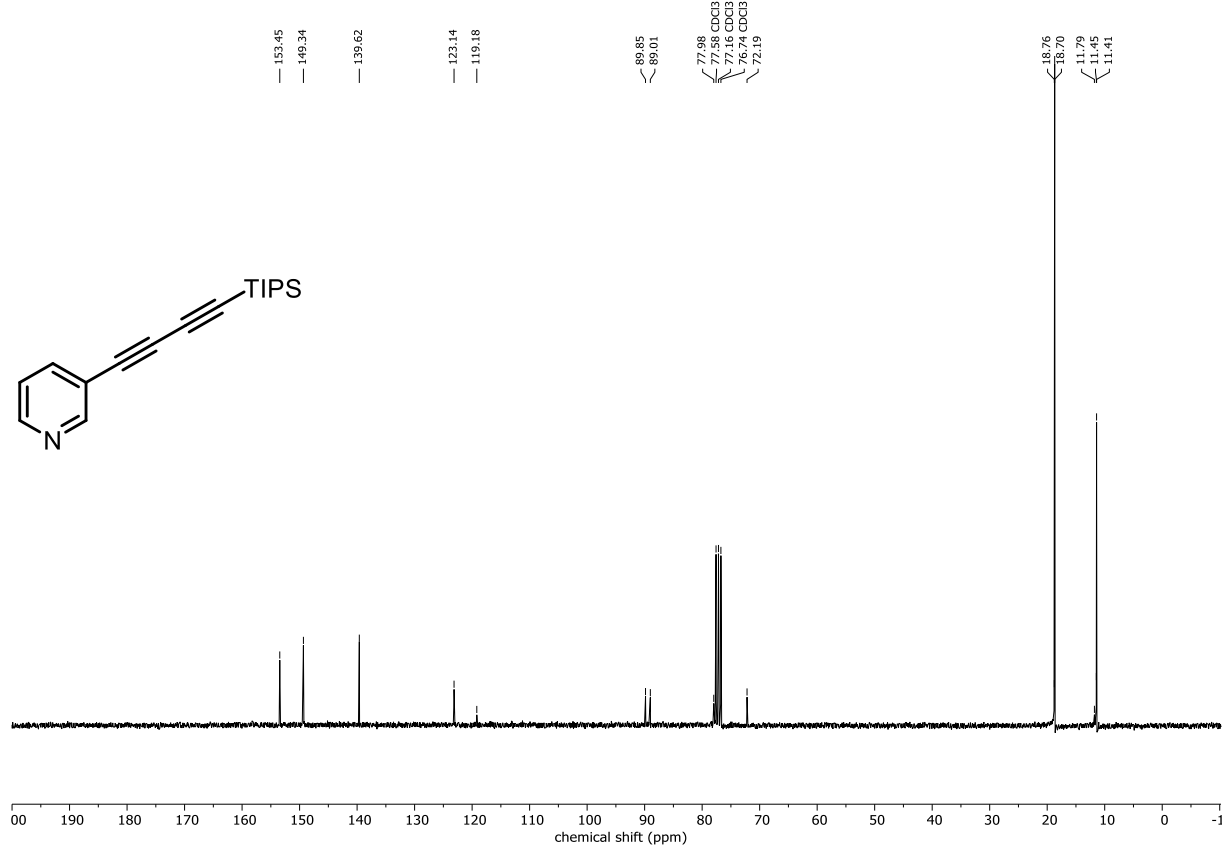

**<sup>1</sup>H NMR (300 MHz, CDCl<sub>3</sub>) of 2f**

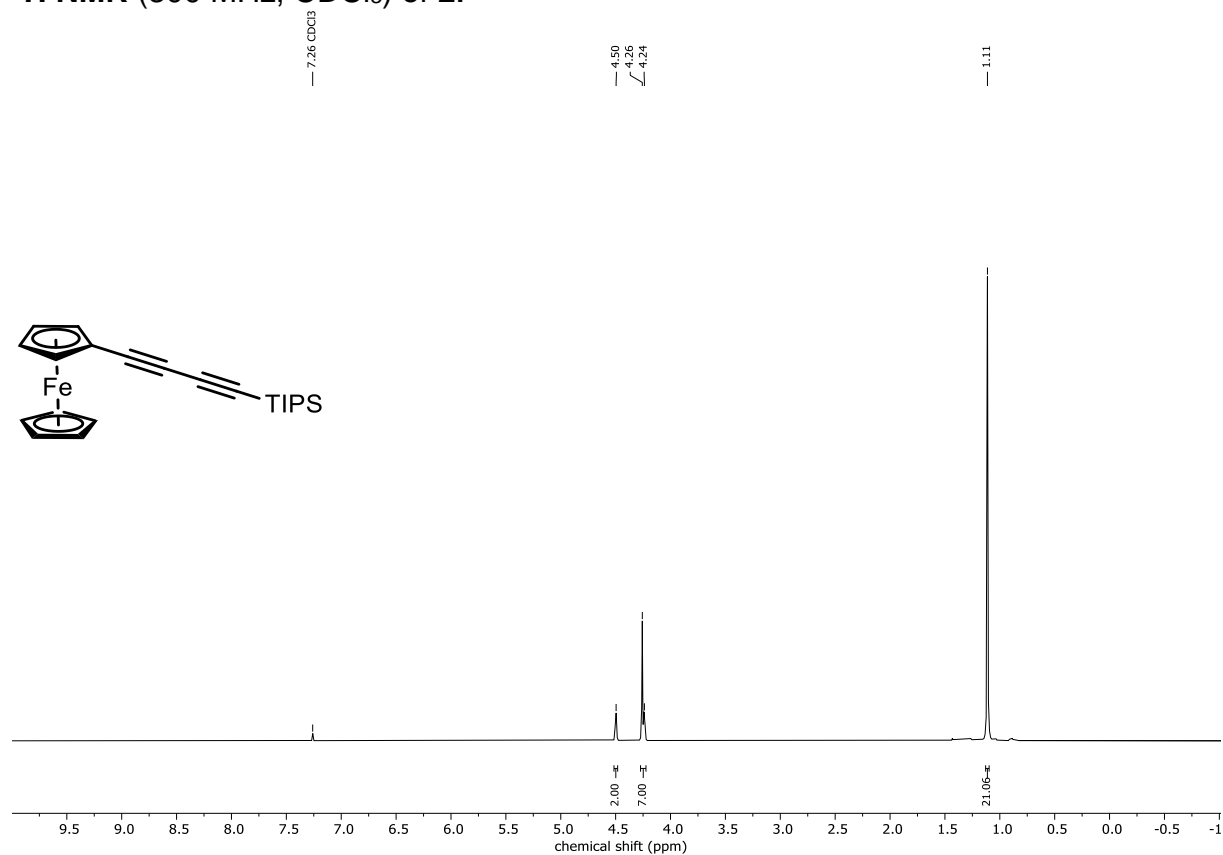

**<sup>13</sup>C NMR (75 MHz, CDCl<sub>3</sub>) of 2f**

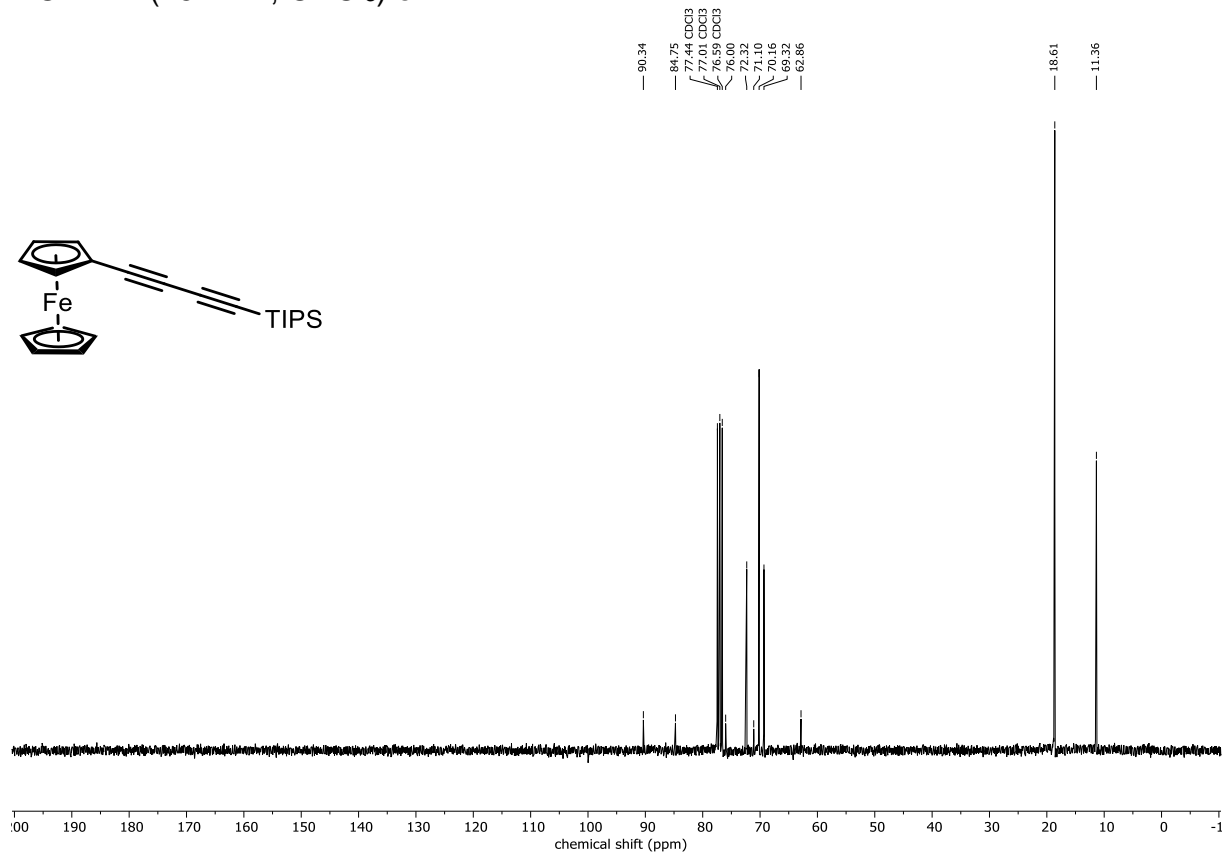



**<sup>1</sup>H NMR (300 MHz, CDCl<sub>3</sub>) of 2g**

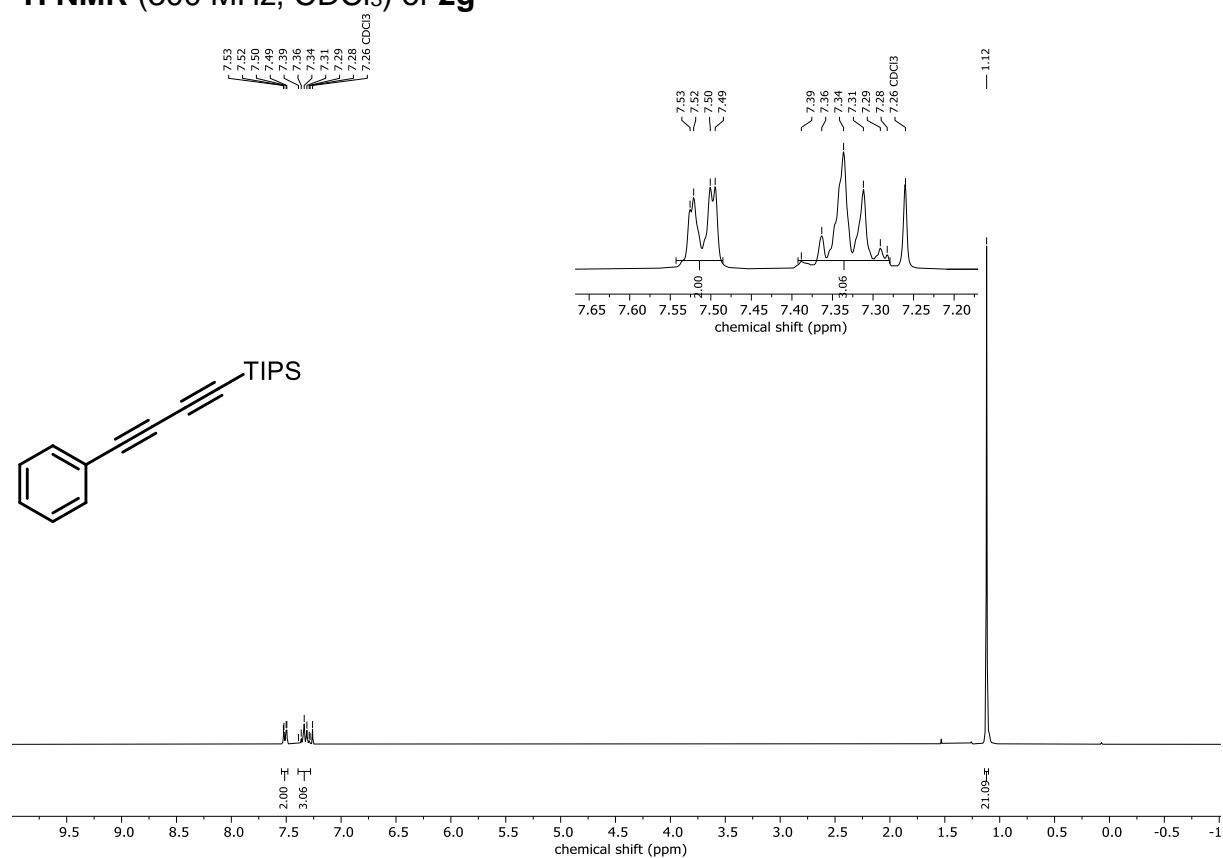

**<sup>13</sup>C NMR (75 MHz, CDCl<sub>3</sub>) of 2g**

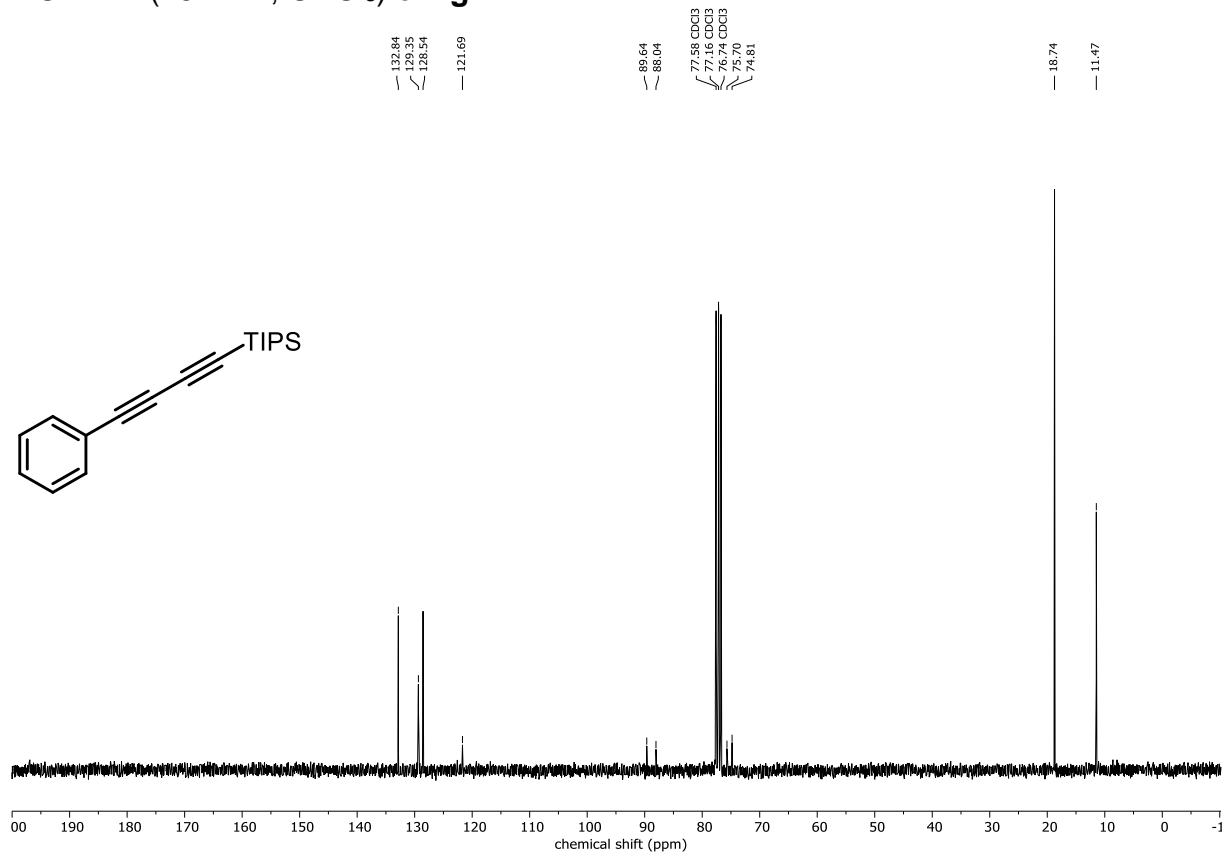

# <sup>1</sup>H NMR (300 MHz, CDCl<sub>3</sub>) of 2h

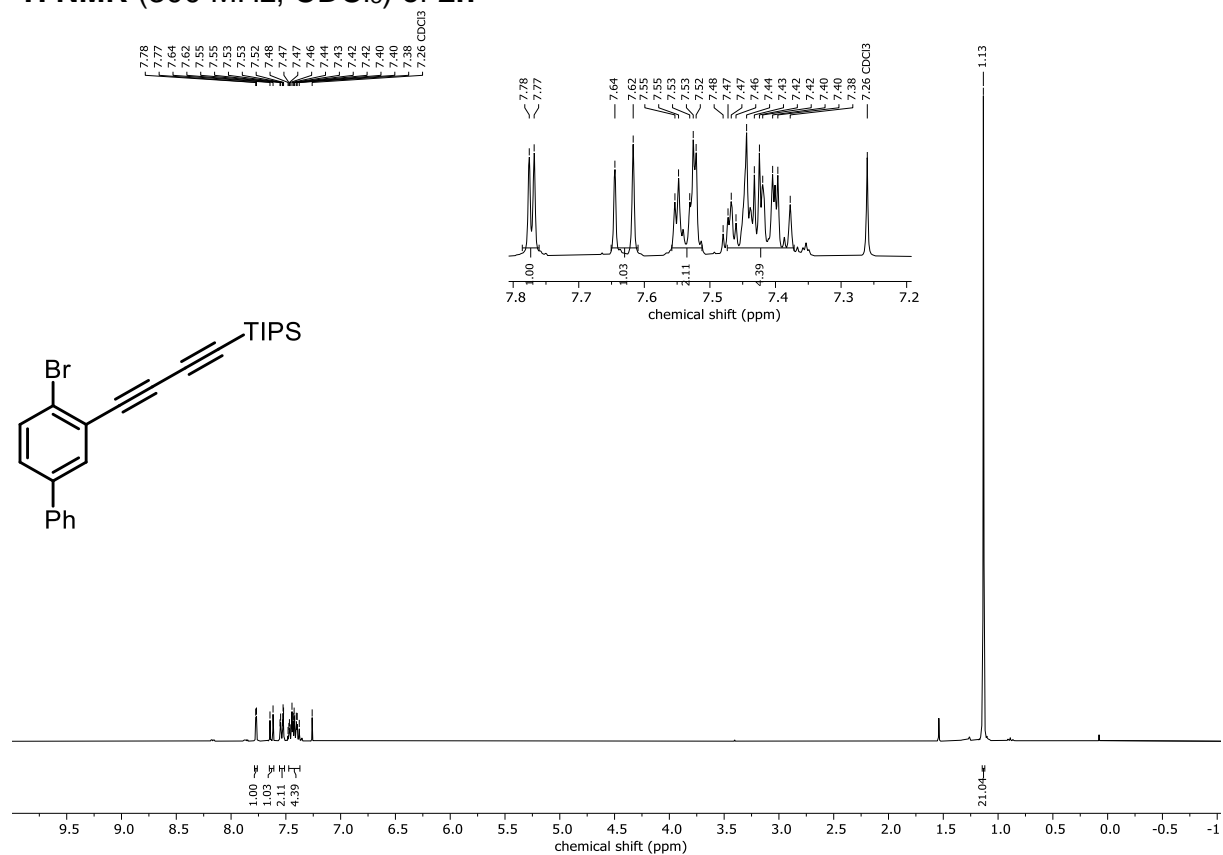

# <sup>13</sup>C NMR (75 MHz, CDCl<sub>3</sub>) of 2h

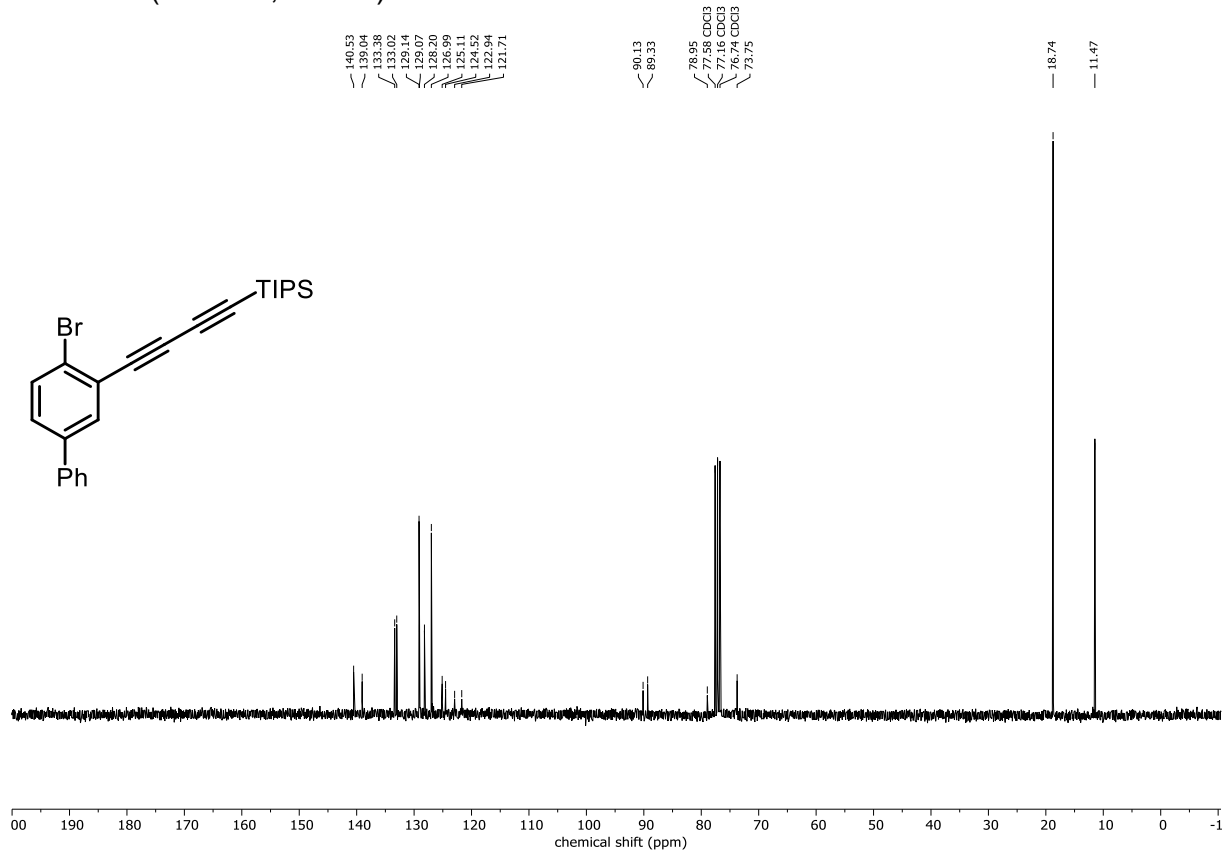

# <sup>1</sup>H NMR (300 MHz, CDCl<sub>3</sub>) of 2i

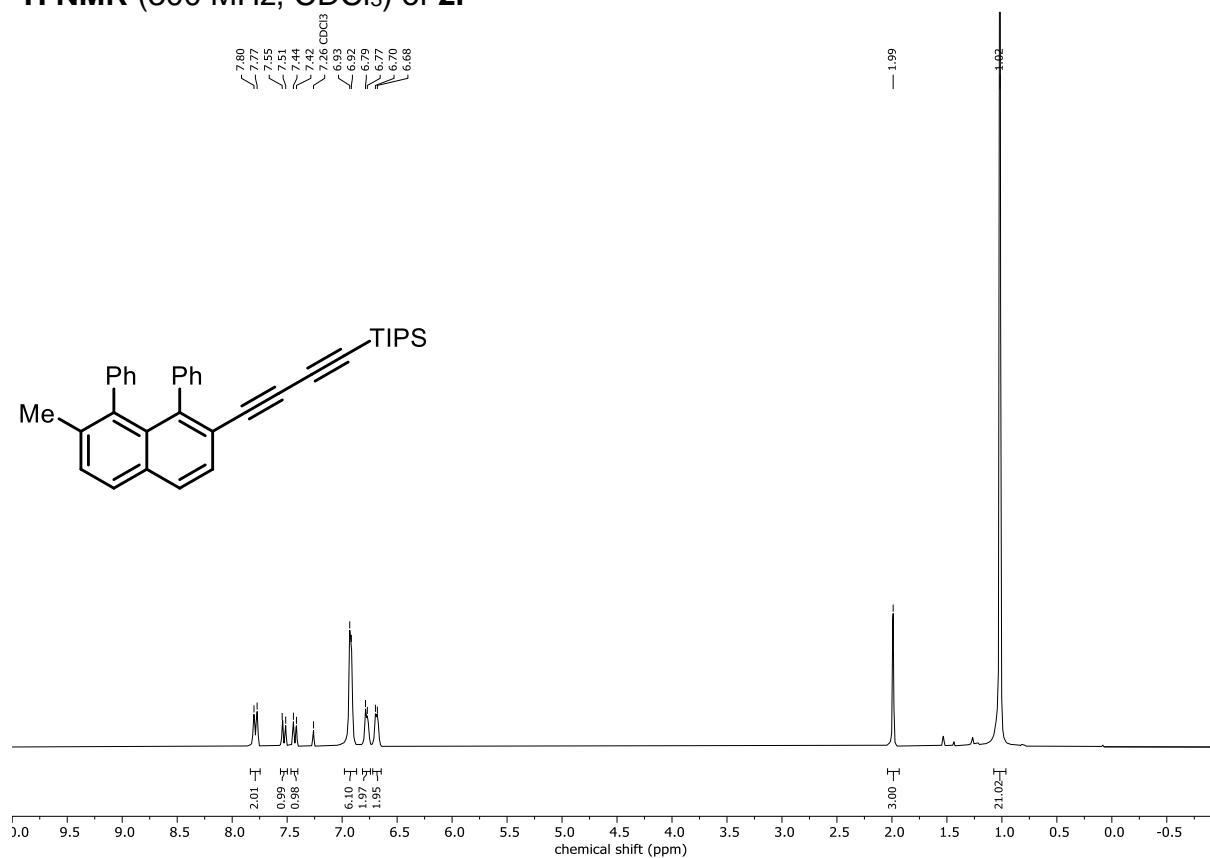

# <sup>13</sup>C NMR (75 MHz, CDCl<sub>3</sub>) of 2i

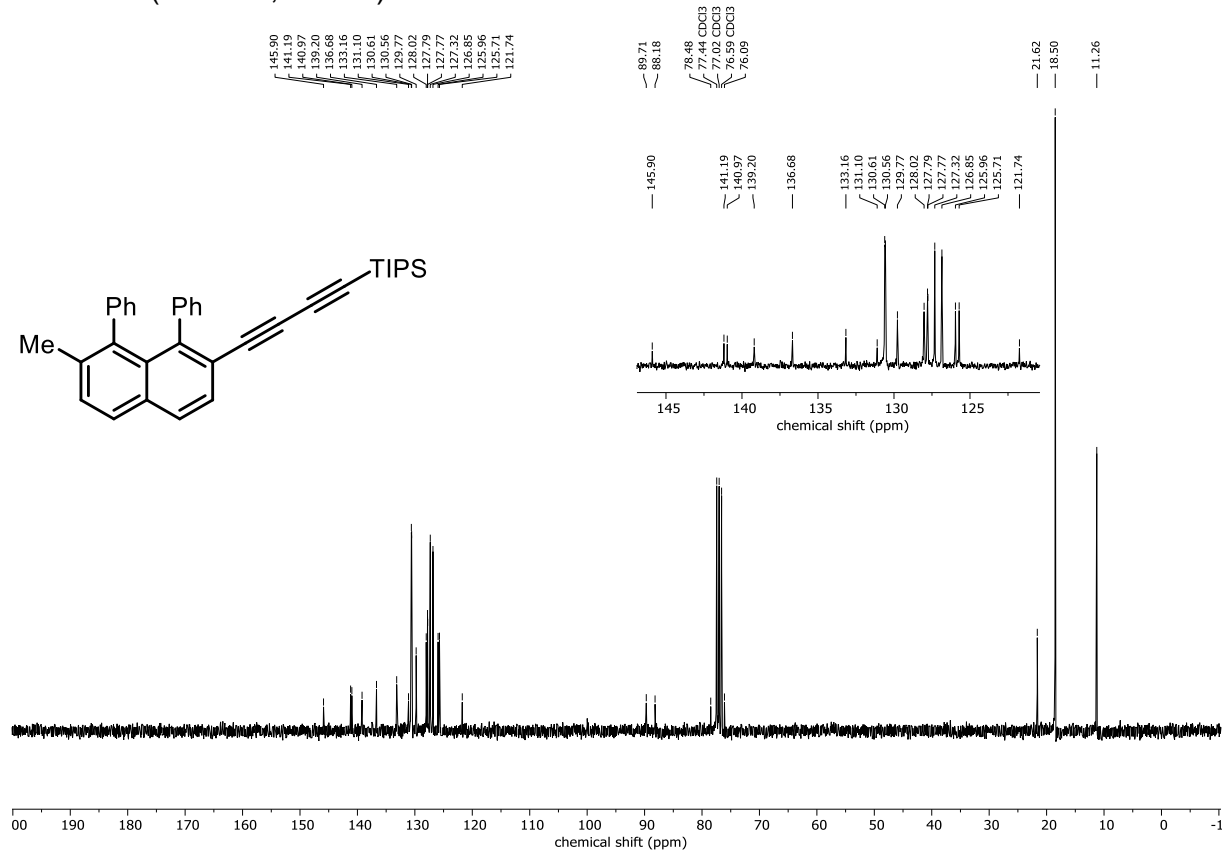

### <sup>1</sup>H NMR (300 MHz, CDCl<sub>3</sub>) of **2j**

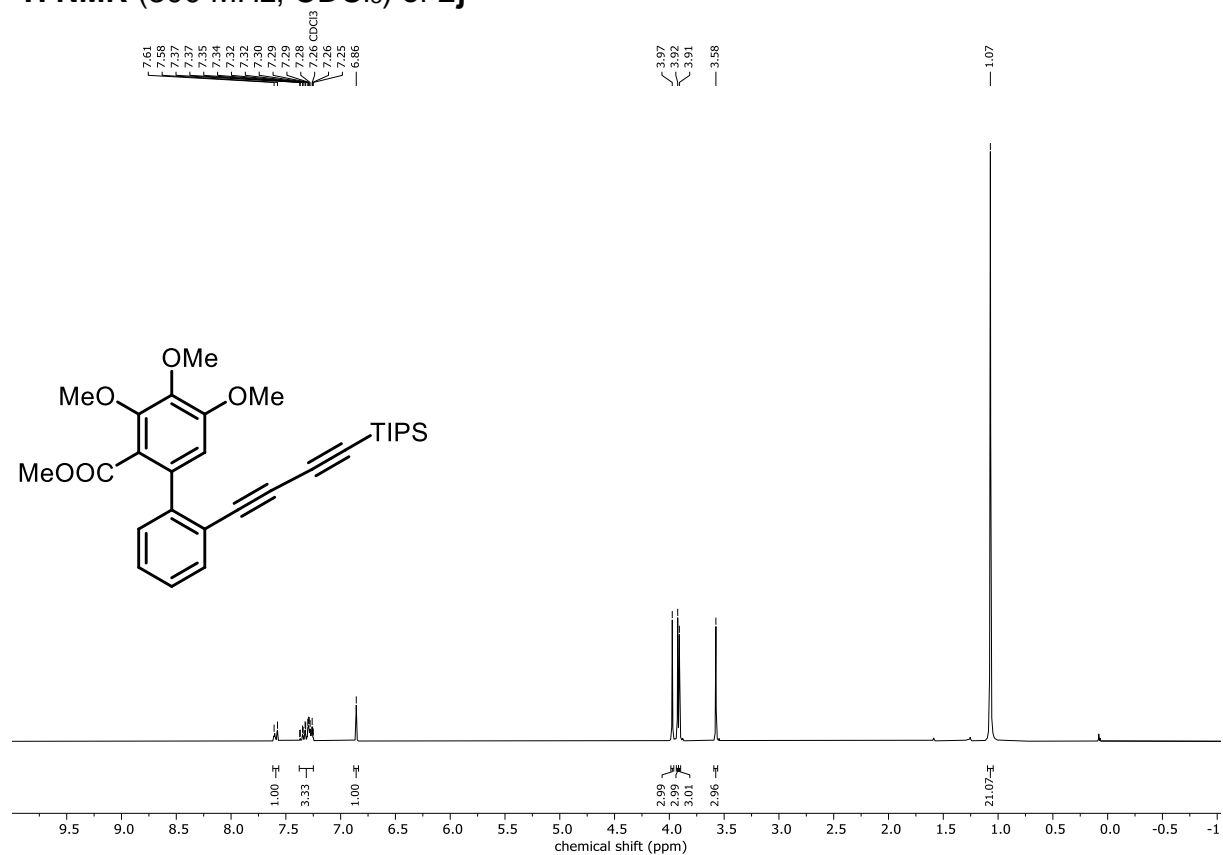

### <sup>13</sup>C NMR (75 MHz, CDCl<sub>3</sub>) of **2j**

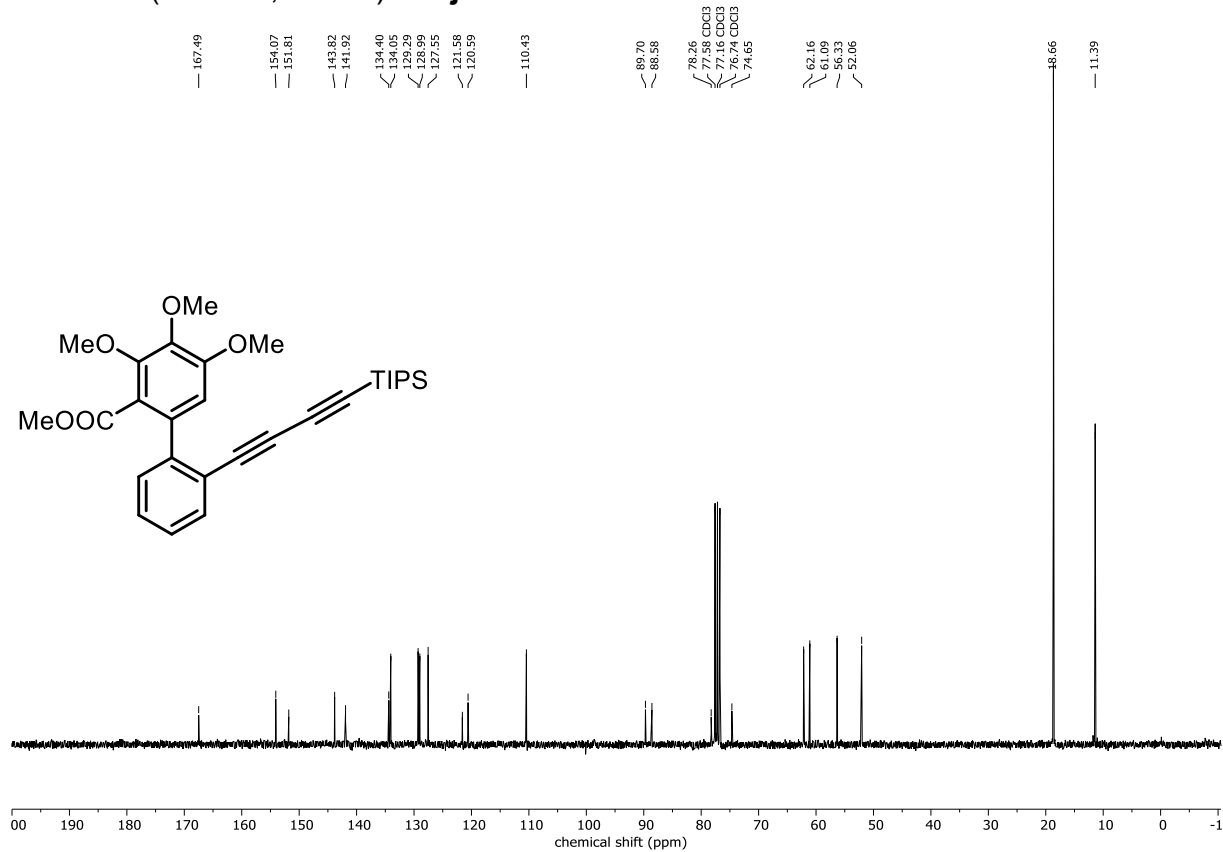

**<sup>1</sup>H NMR (300 MHz, CDCl<sub>3</sub>) of 2k**

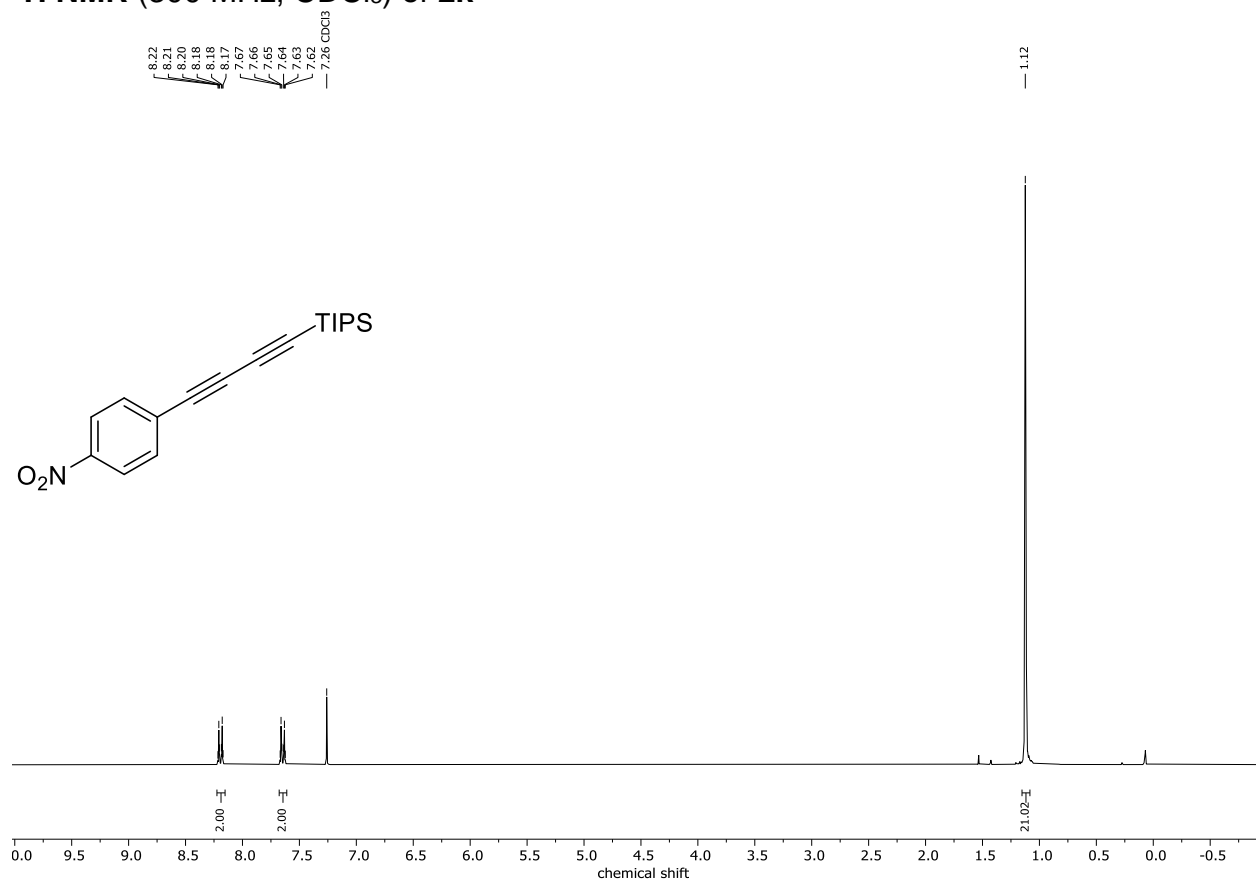

**<sup>13</sup>C NMR (101 MHz, CDCl<sub>3</sub>) of 2k**

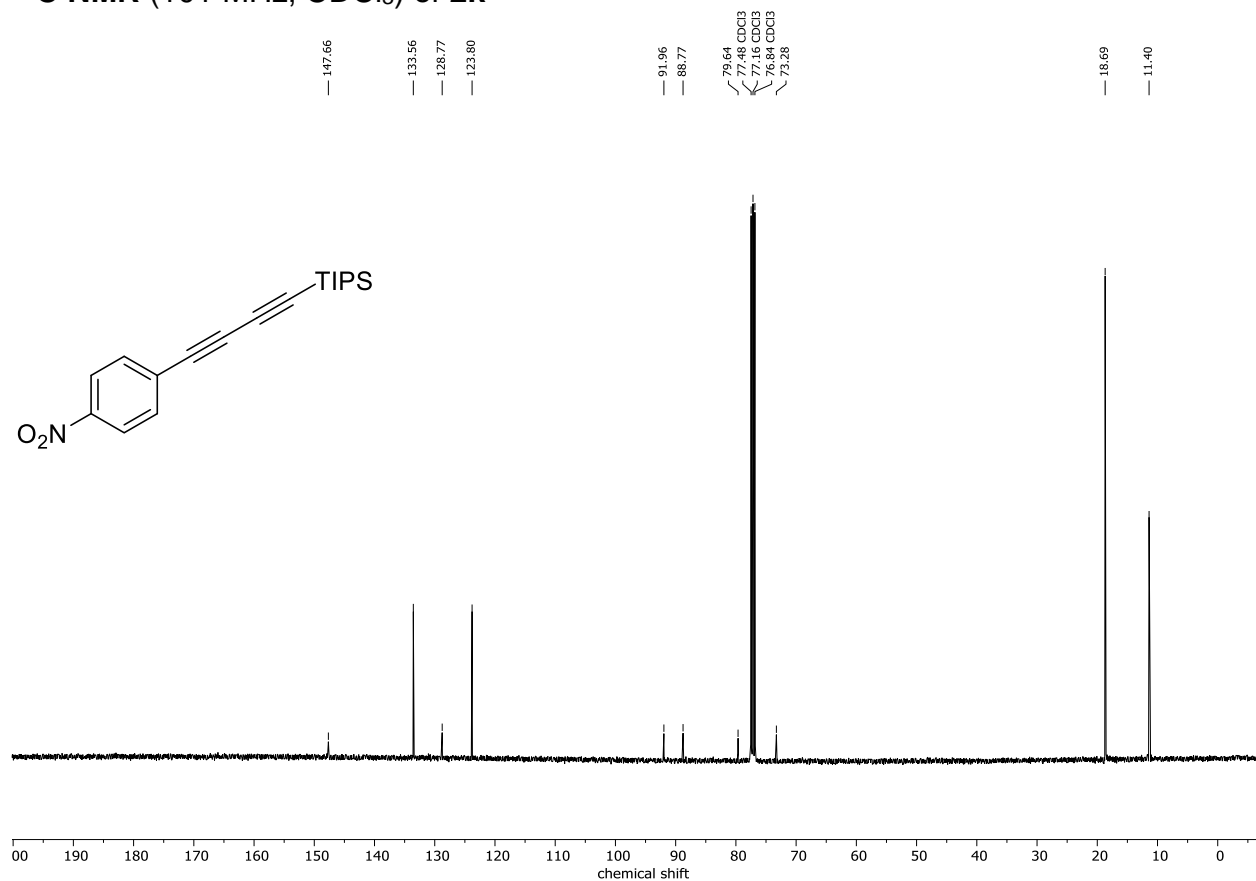

**<sup>1</sup>H NMR (300 MHz, CDCl<sub>3</sub>) of 2I**

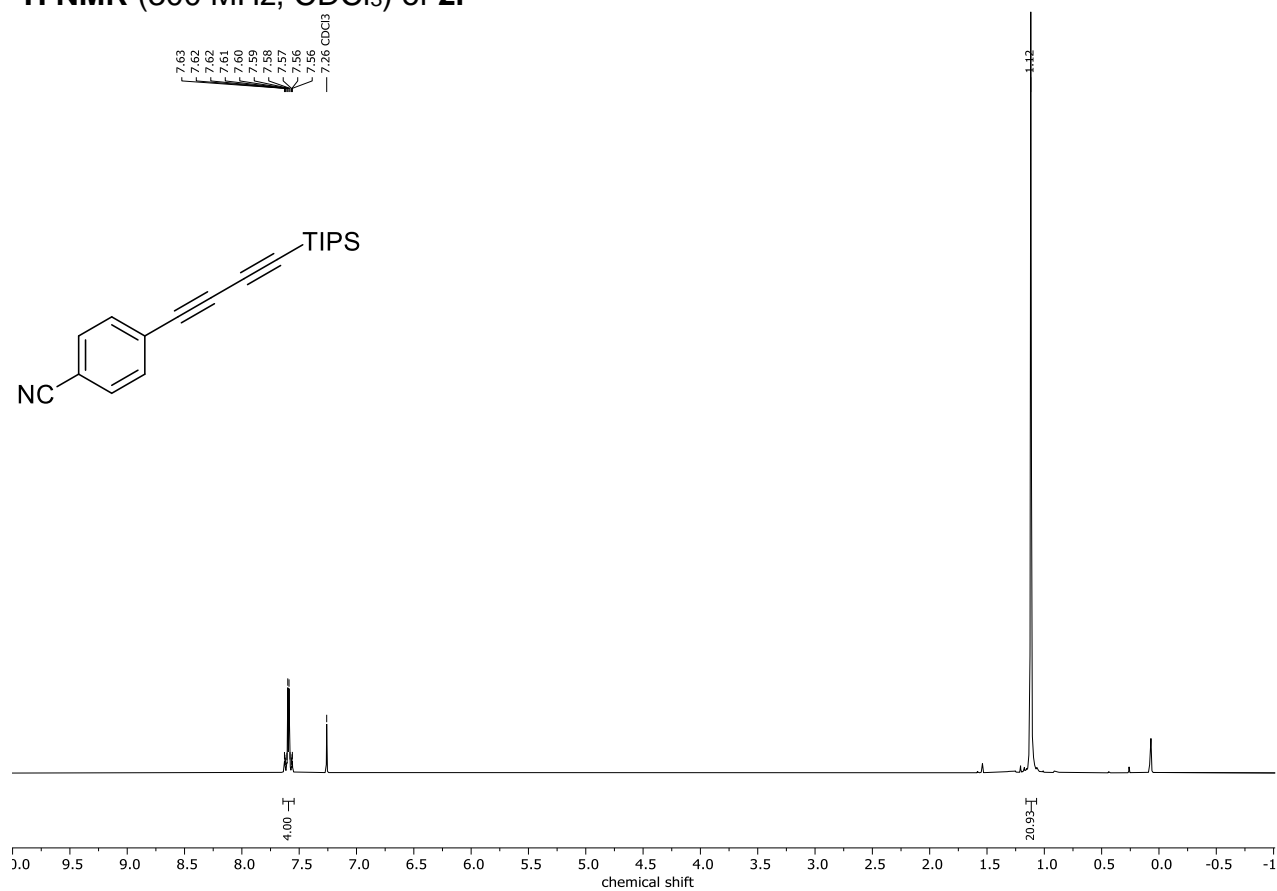

**<sup>13</sup>C NMR (101 MHz, CDCl<sub>3</sub>) of 2I**

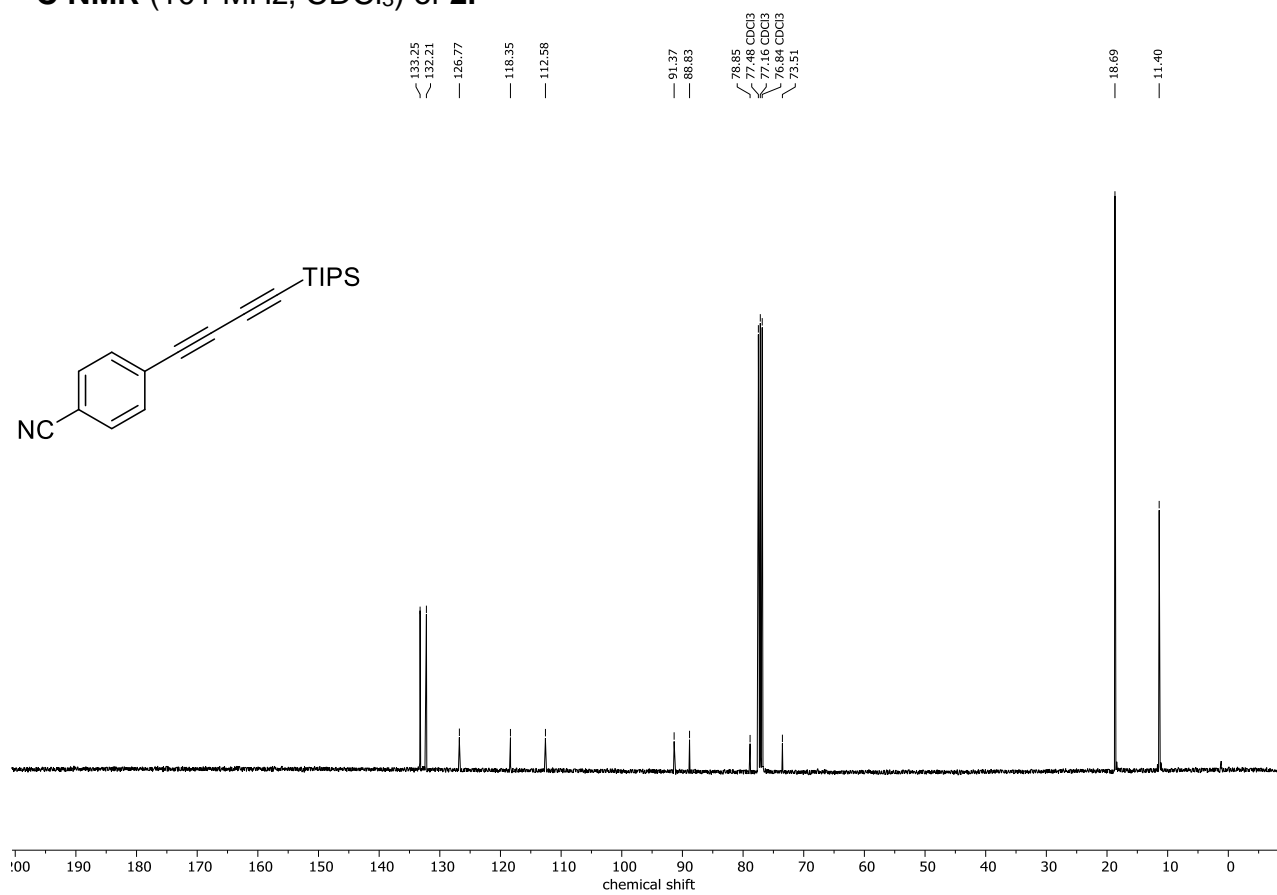

**<sup>1</sup>H NMR (300 MHz, CDCl<sub>3</sub>) of 2m**

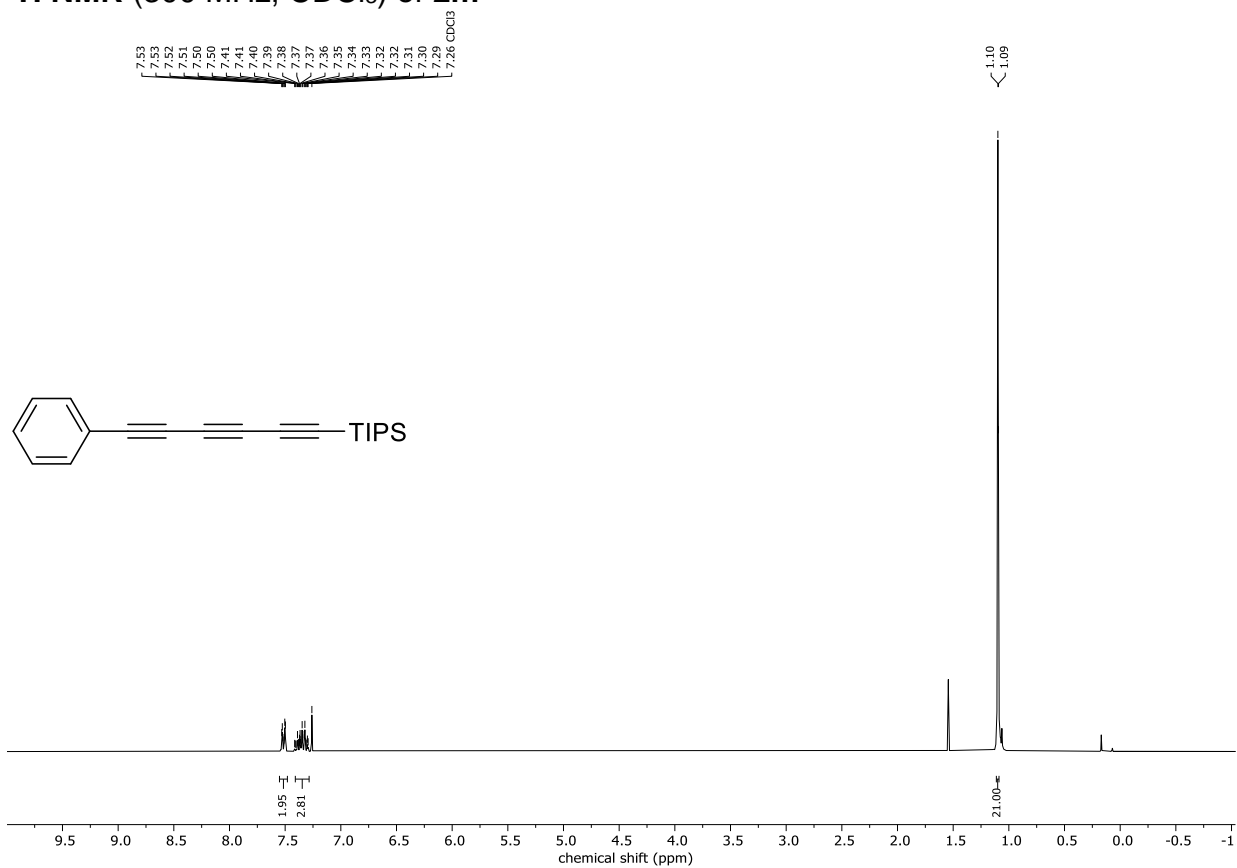

**<sup>13</sup>C NMR (101 MHz, CDCl<sub>3</sub>) of 2m**

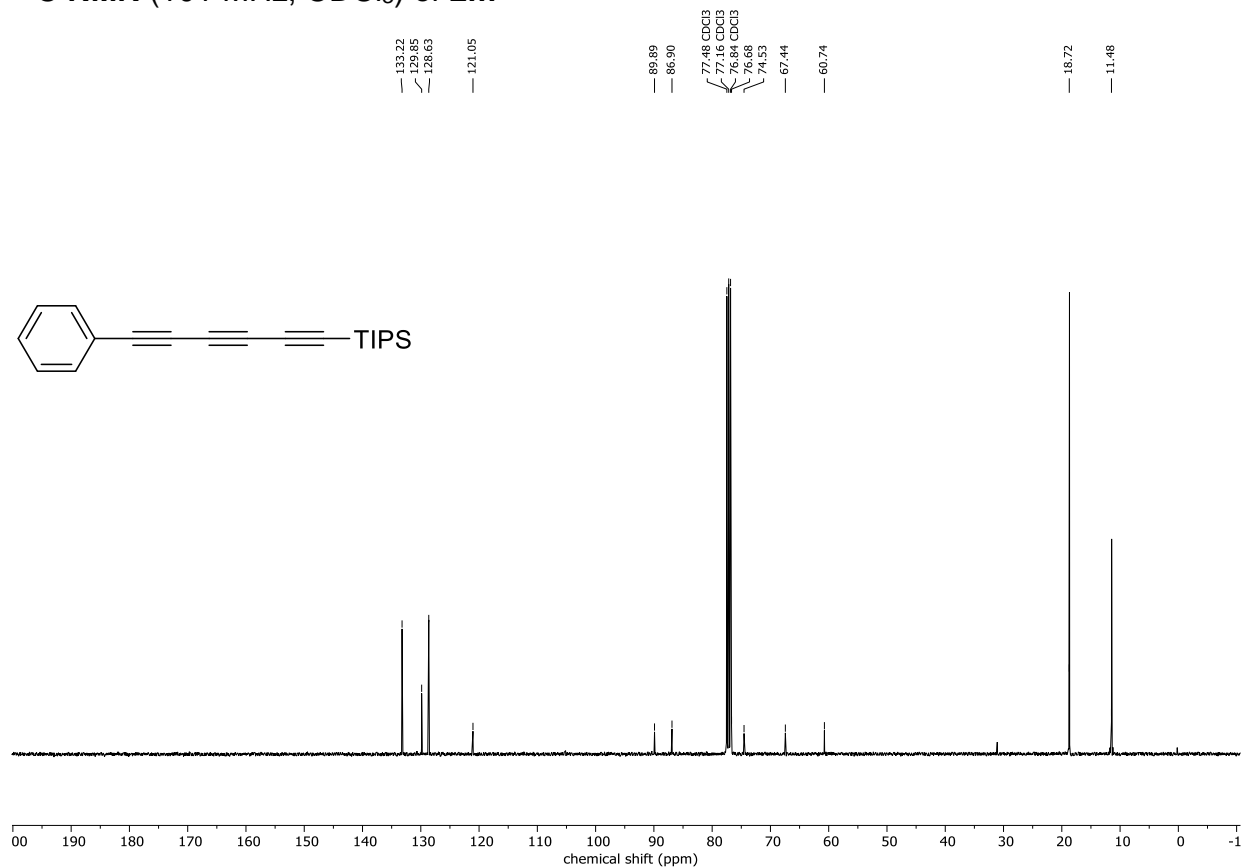

**<sup>1</sup>H NMR (400 MHz, CDCl<sub>3</sub>) of 2n**

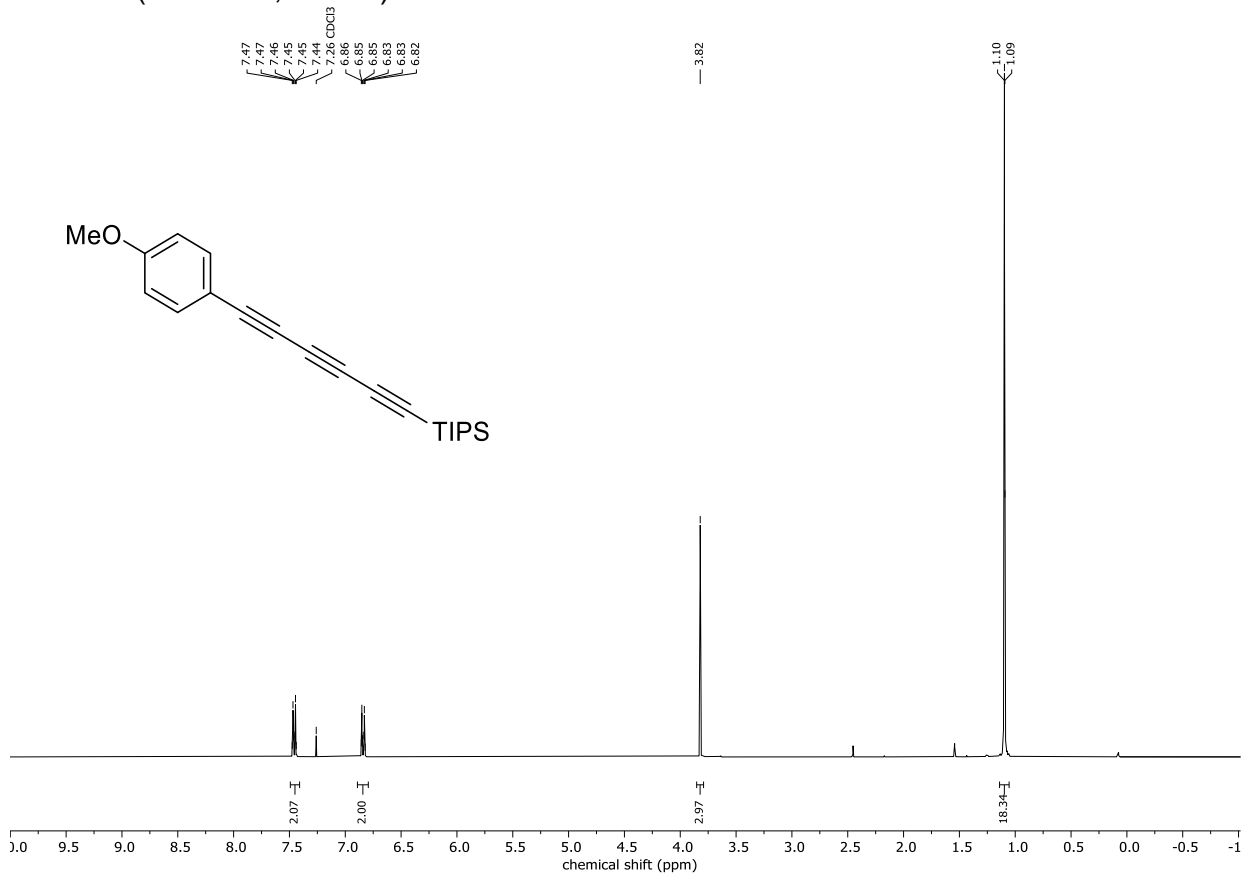

**<sup>13</sup>C NMR (151 MHz, CDCl<sub>3</sub>) of 2n**

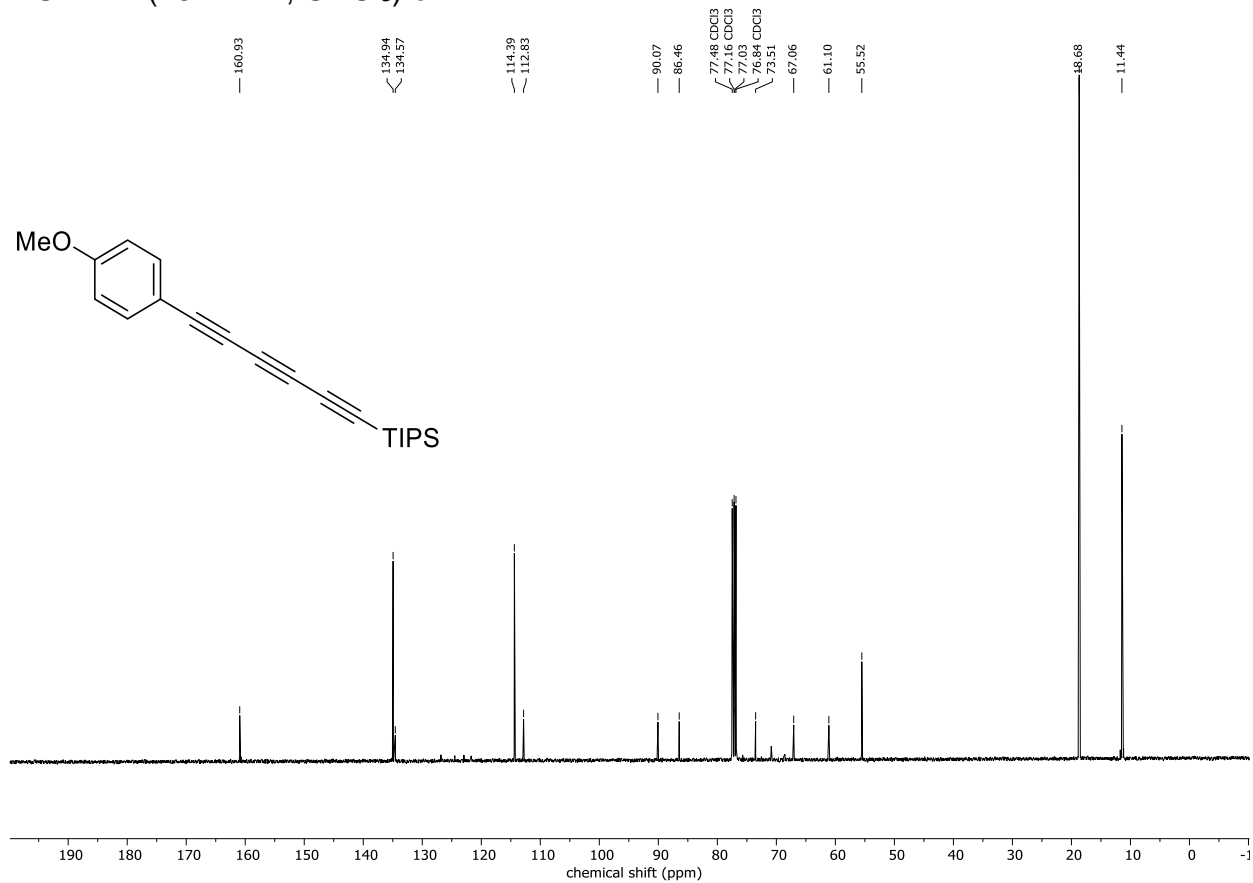



**$^1\text{H}$  NMR (300 MHz,  $\text{CDCl}_3$ ) of **2o****

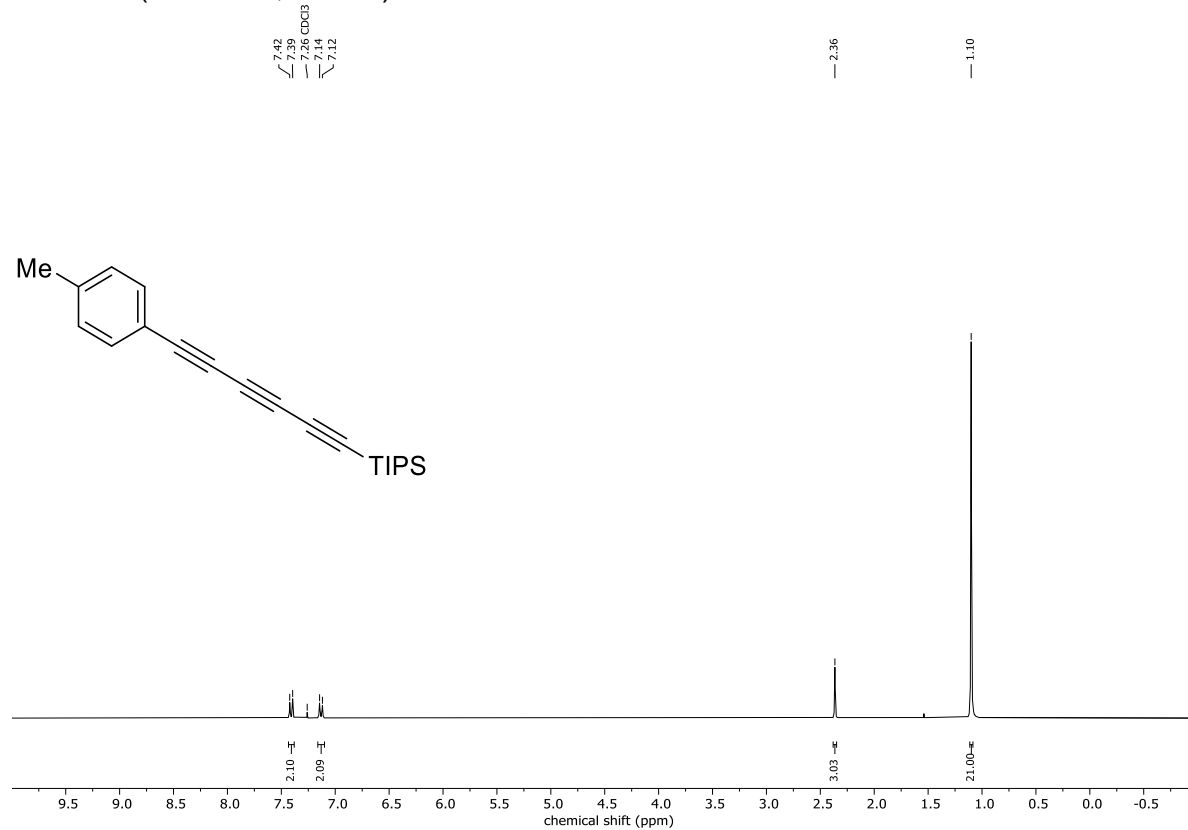

**$^{13}\text{C}$  NMR (101 MHz,  $\text{CDCl}_3$ ) of **2o****

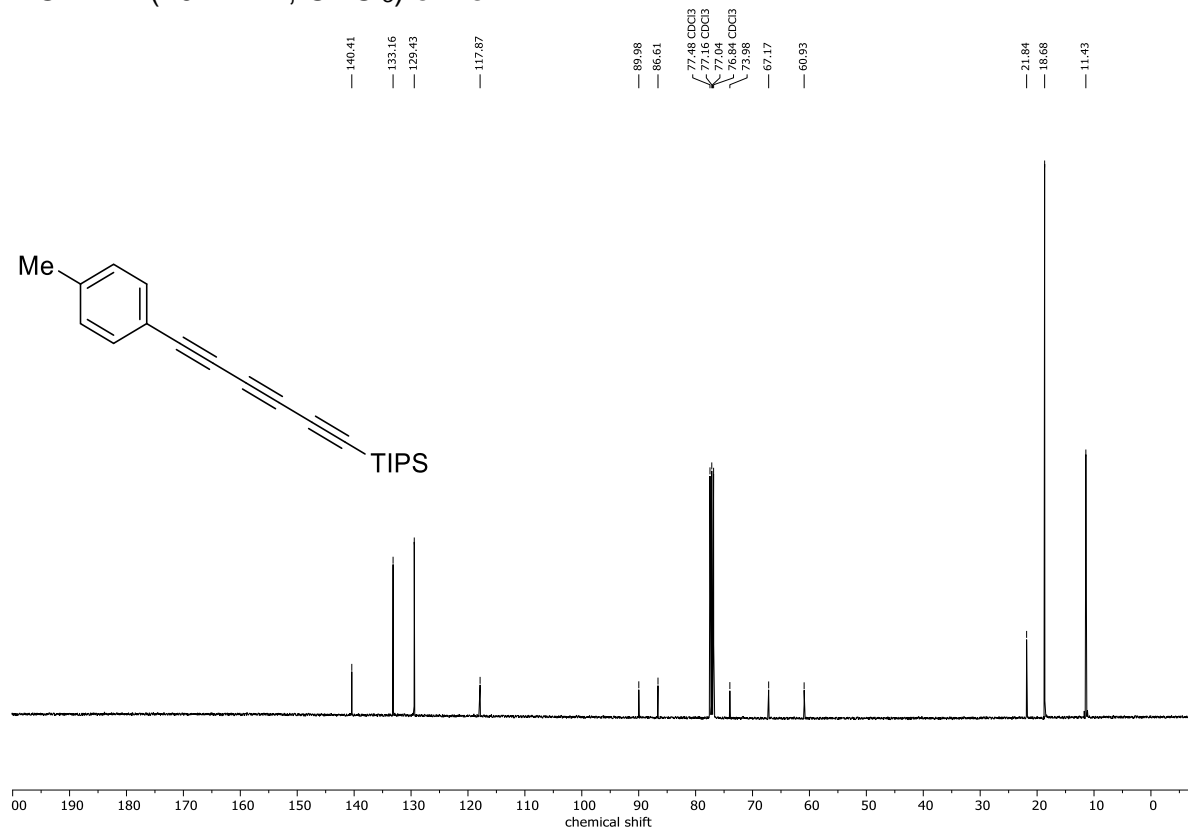

# <sup>1</sup>H NMR (600 MHz, CDCl<sub>3</sub>) of 2p

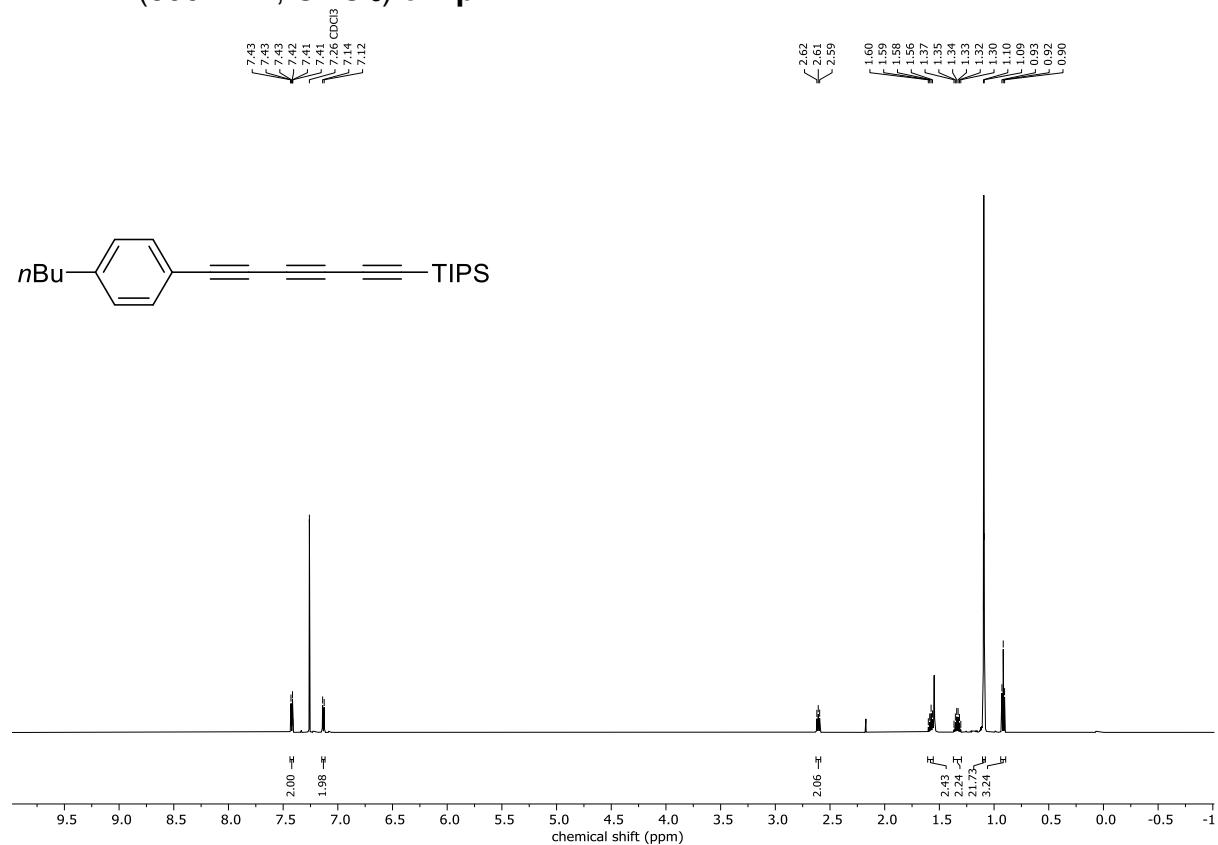

# <sup>13</sup>C NMR (151 MHz, CDCl<sub>3</sub>) of 2p

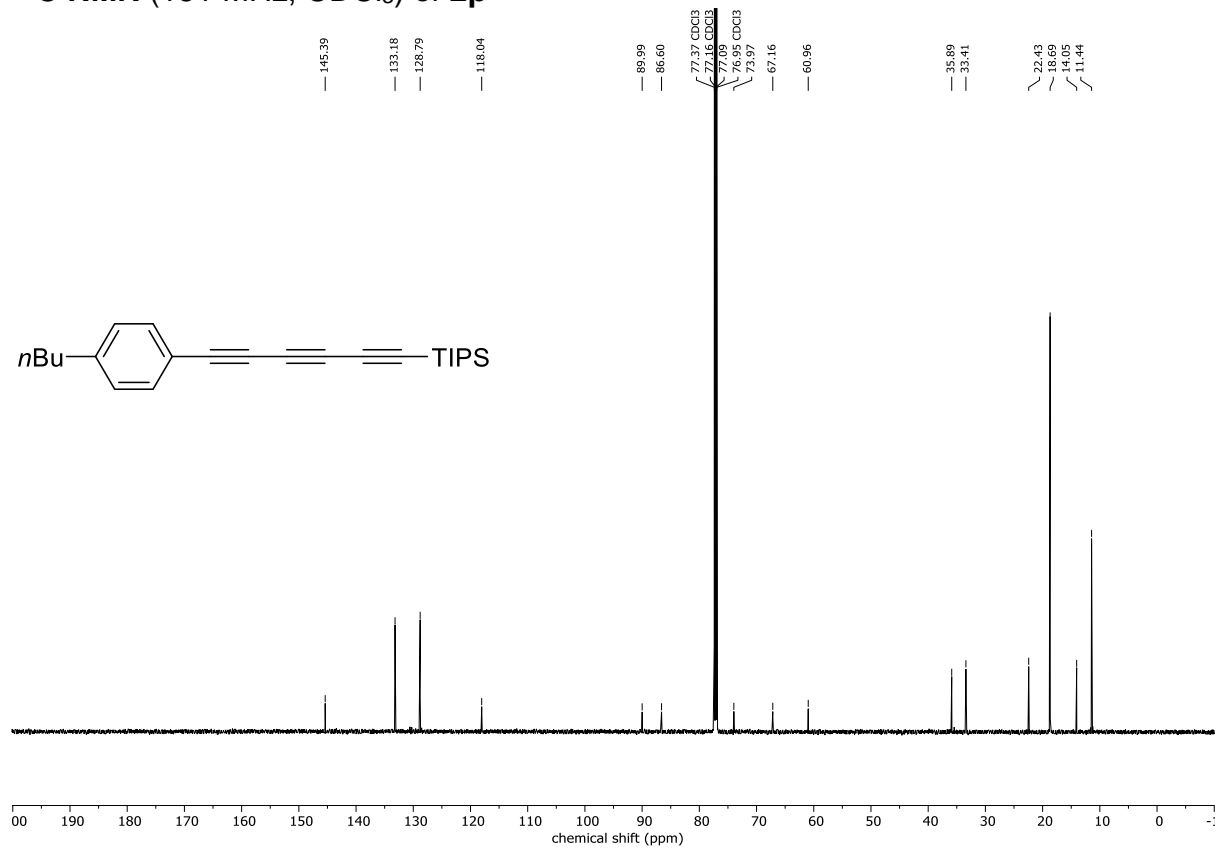

**<sup>1</sup>H NMR (300 MHz, CDCl<sub>3</sub>) of 3a**

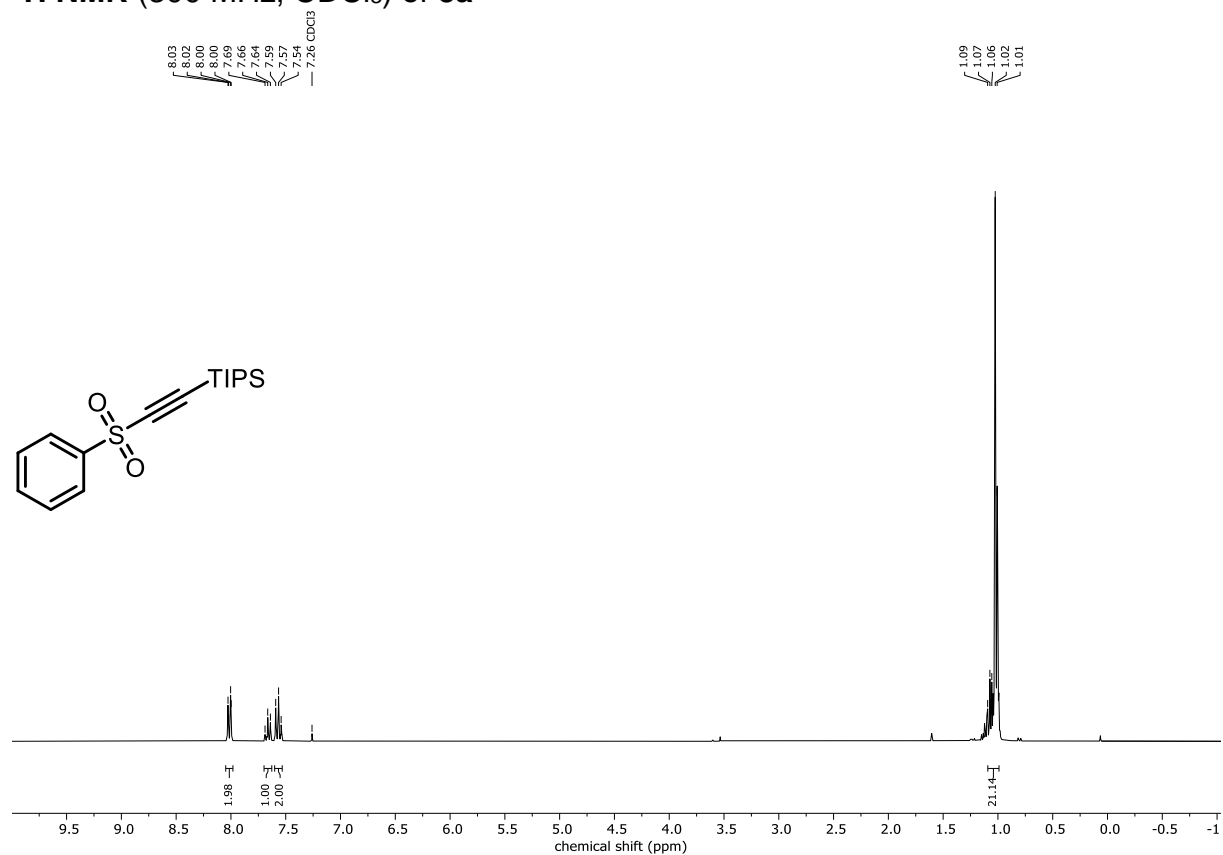

**<sup>13</sup>C NMR (75 MHz, CDCl<sub>3</sub>) of 3a**

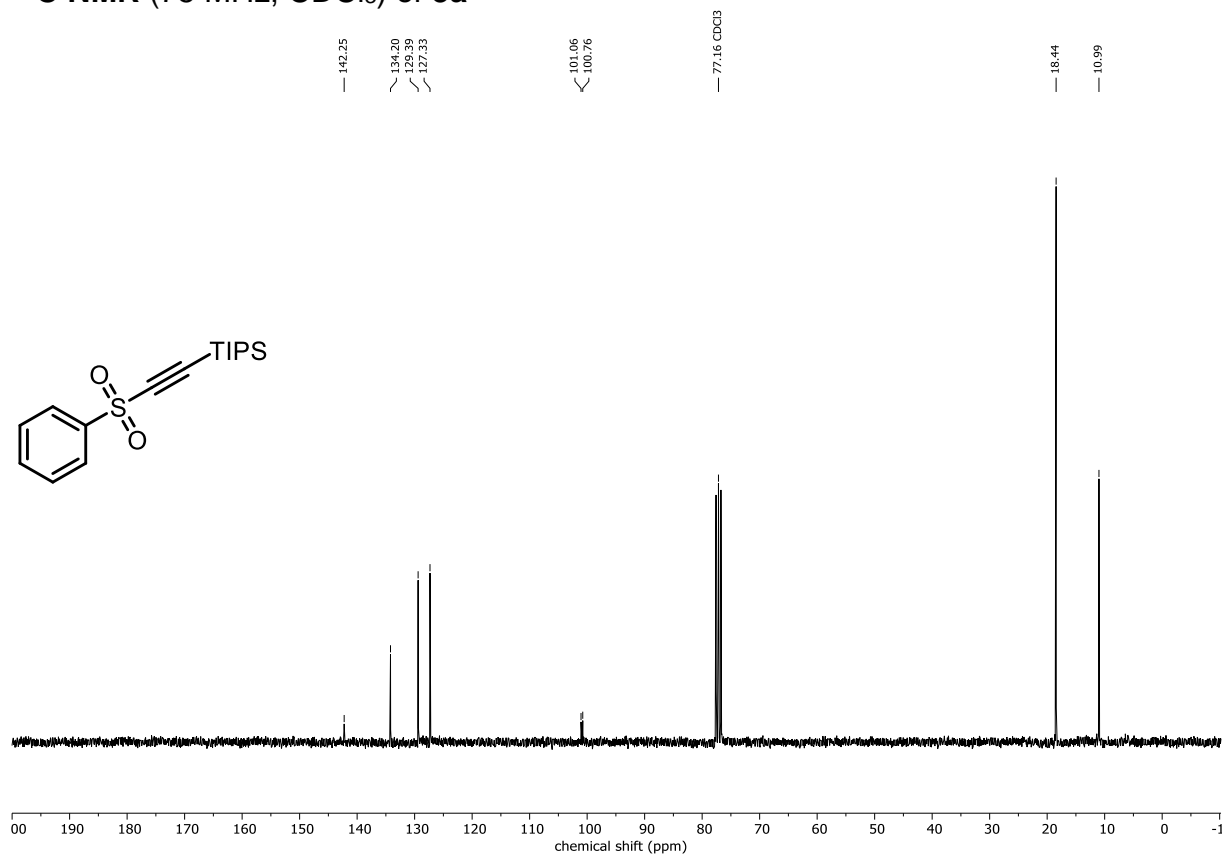

**<sup>1</sup>H NMR (400 MHz, CDCl<sub>3</sub>) of 3b**

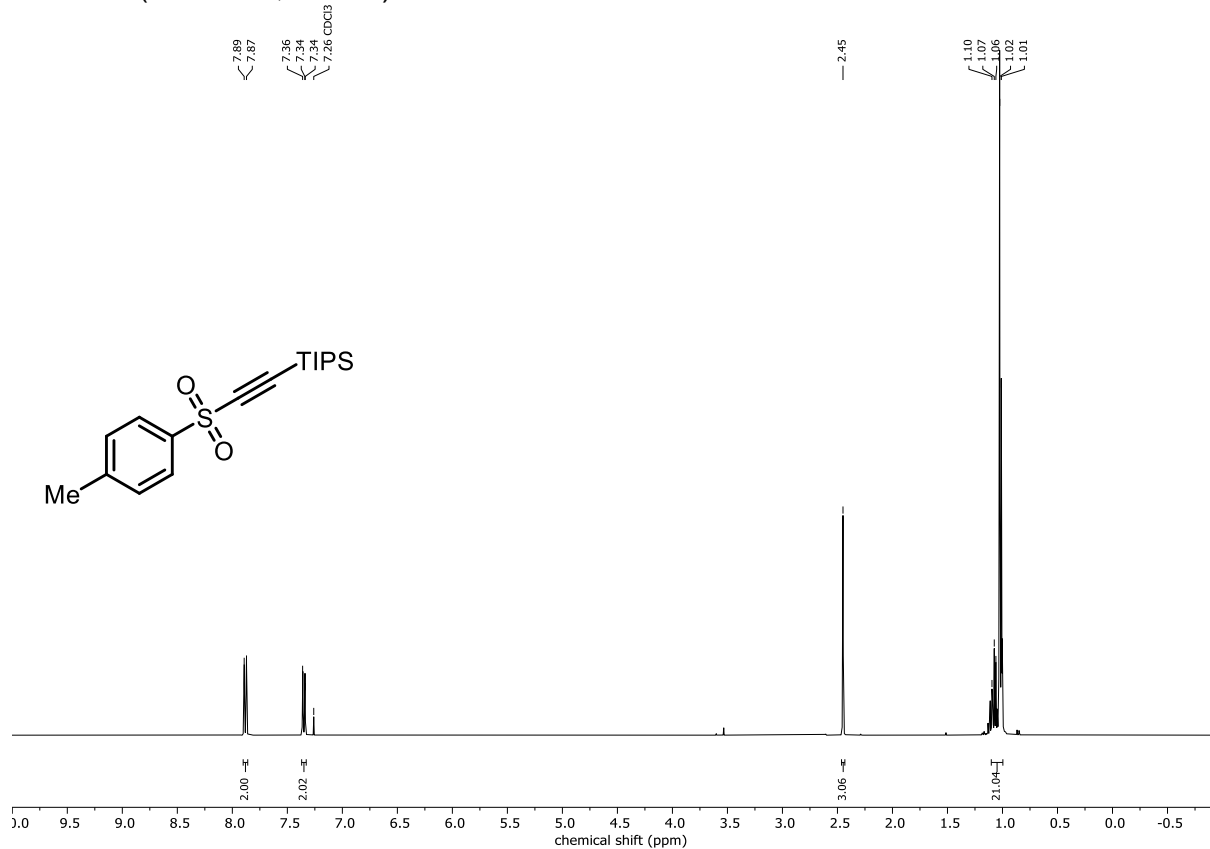

**<sup>13</sup>C NMR (101 MHz, CDCl<sub>3</sub>) of 3b**

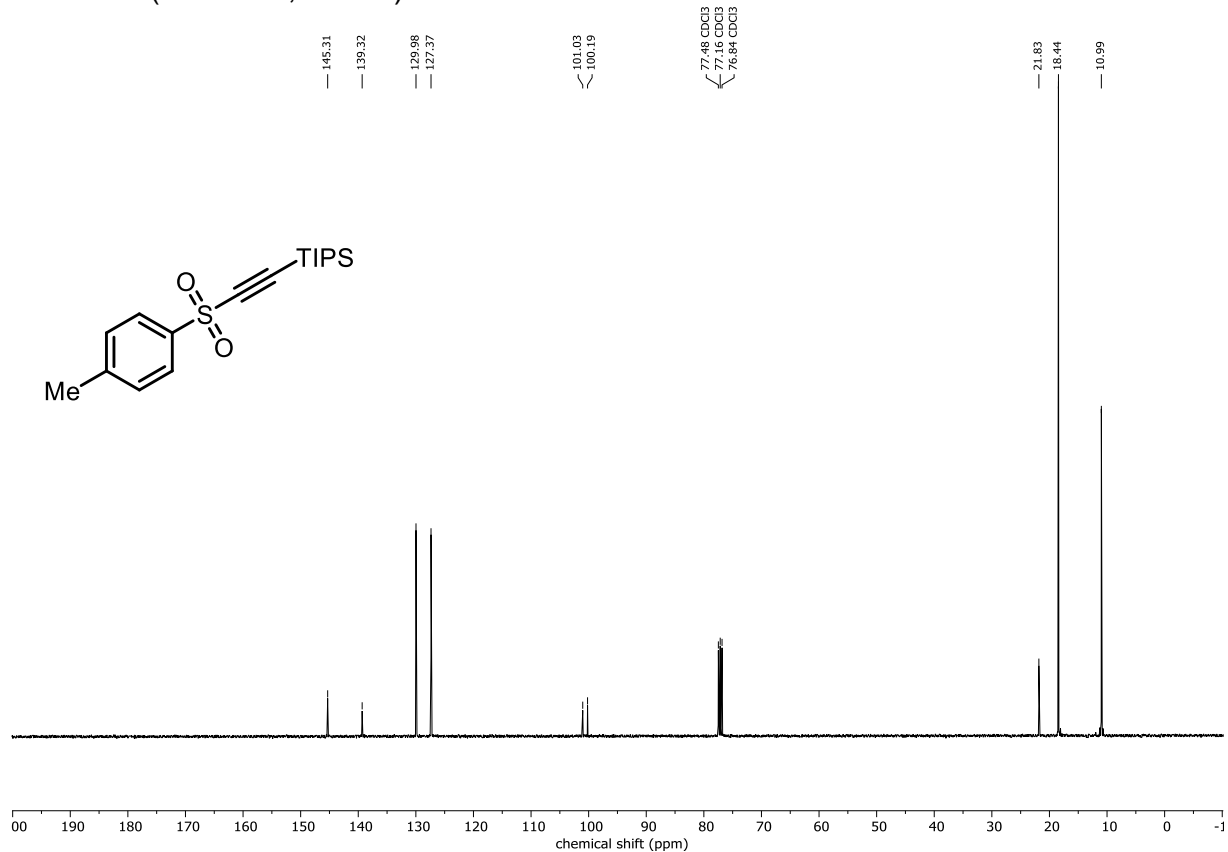

**<sup>1</sup>H NMR (400 MHz, CDCl<sub>3</sub>) of 3c**

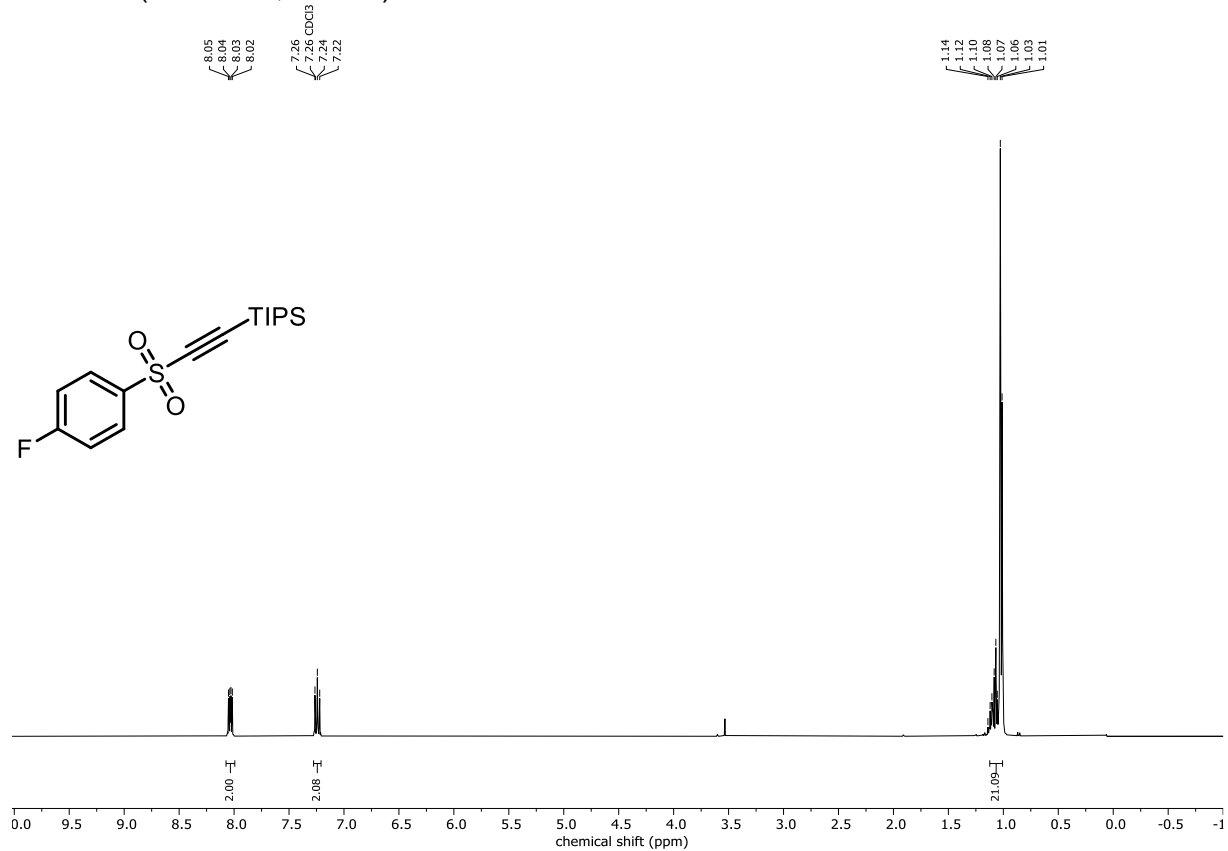

**<sup>19</sup>F NMR (376 MHz, CDCl<sub>3</sub>) of 3c**

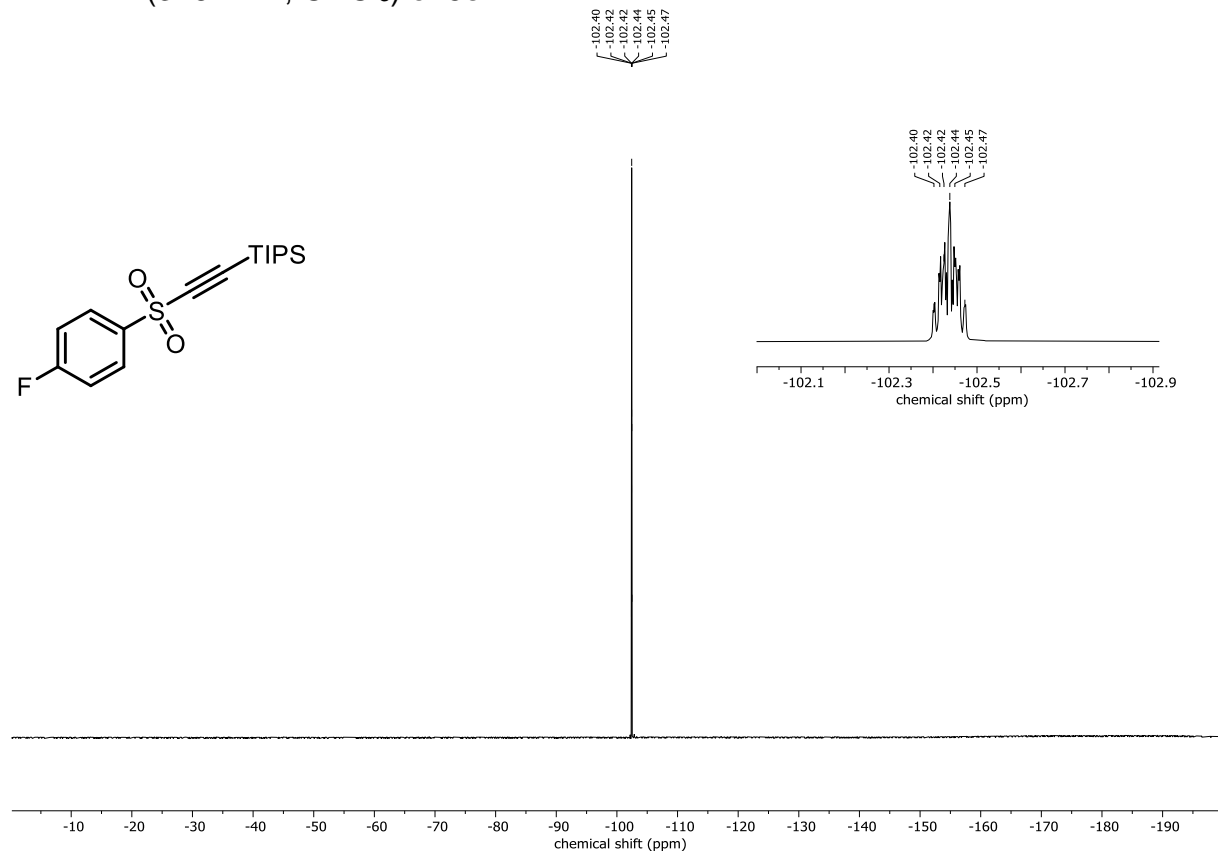

**<sup>13</sup>C NMR (101 MHz, CDCl<sub>3</sub>) of 3c**

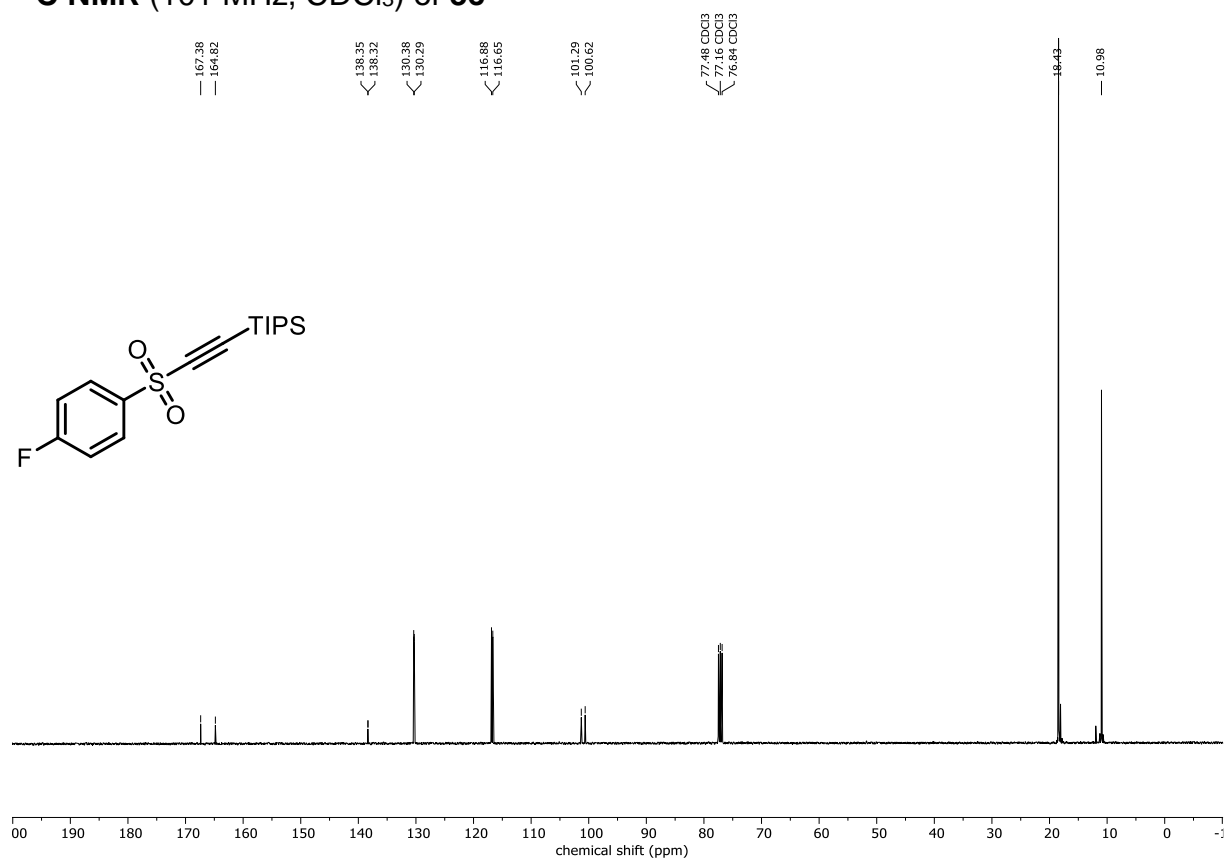

**<sup>1</sup>H NMR (400 MHz, CDCl<sub>3</sub>) of 3d**

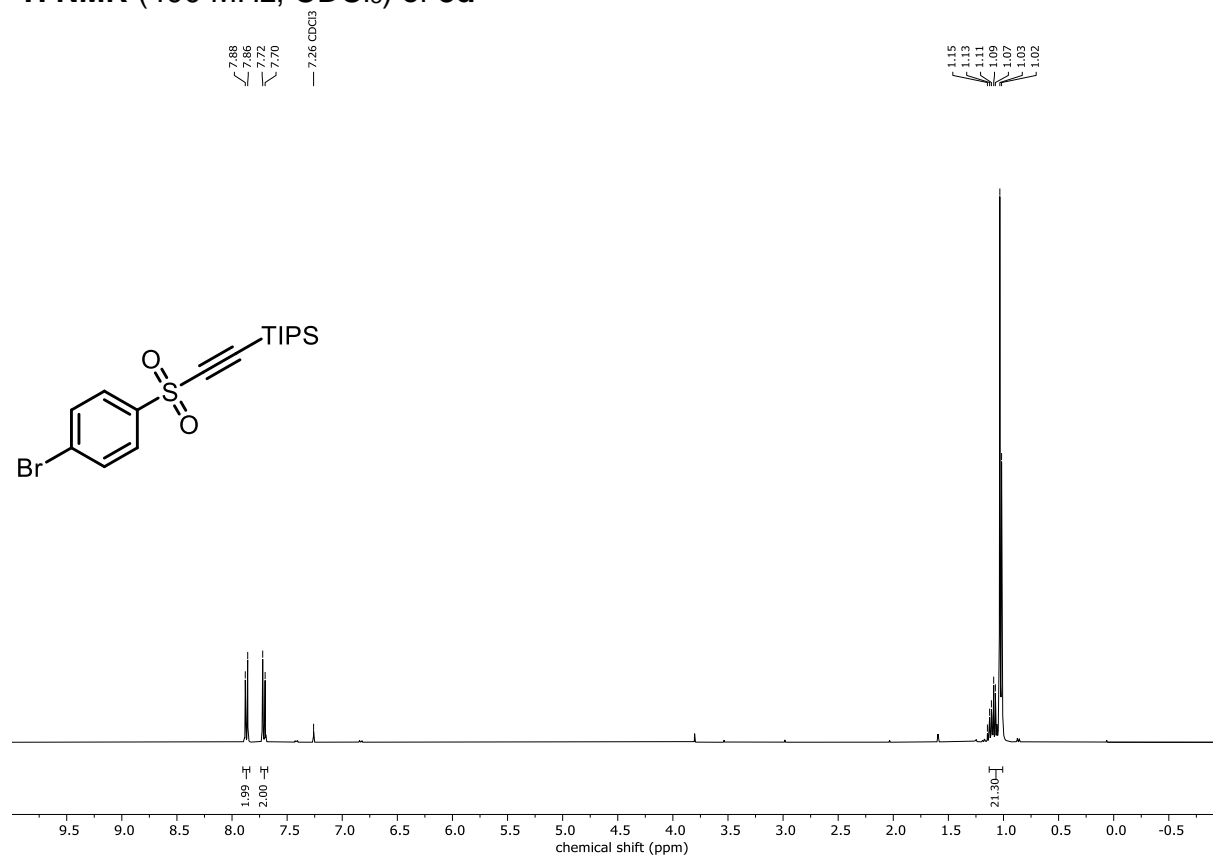

**<sup>13</sup>C NMR (101 MHz, CDCl<sub>3</sub>) of 3d**

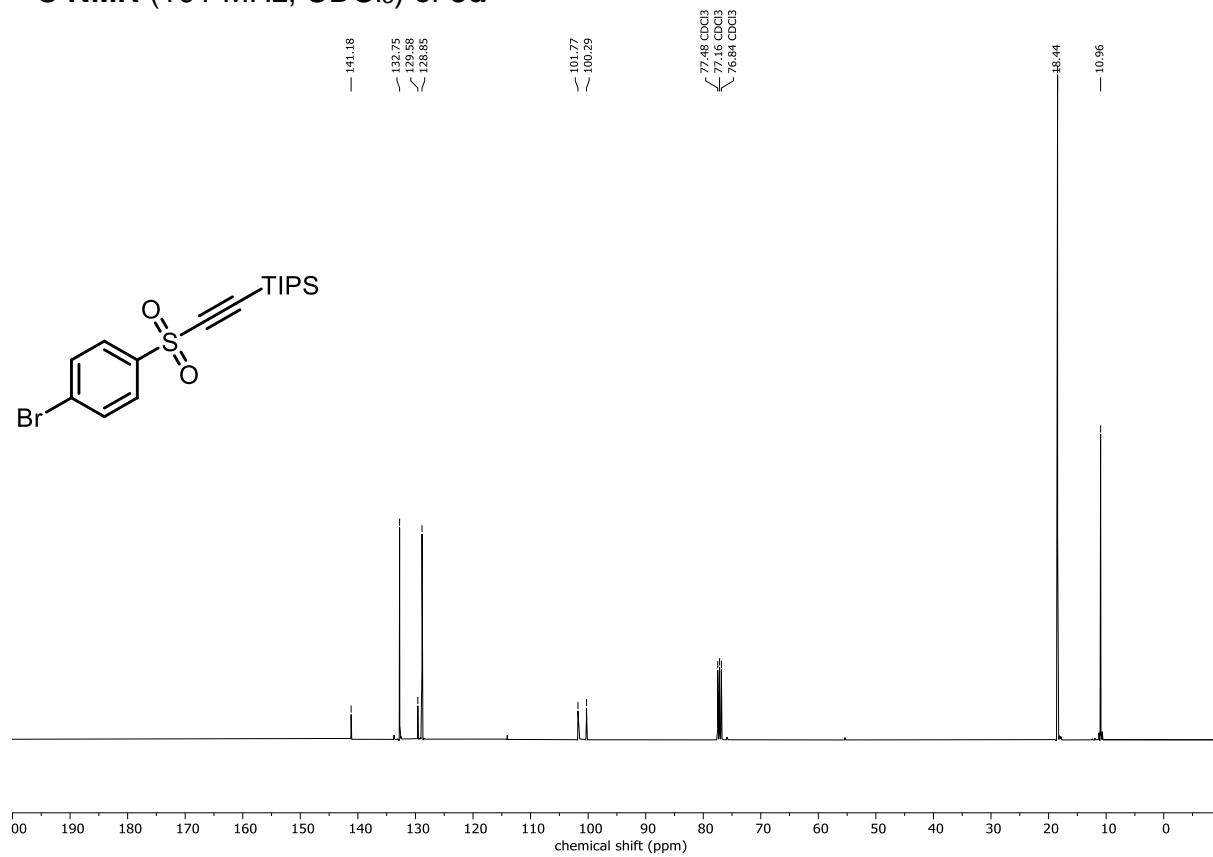

**<sup>1</sup>H NMR (400 MHz, CDCl<sub>3</sub>) of 3e**

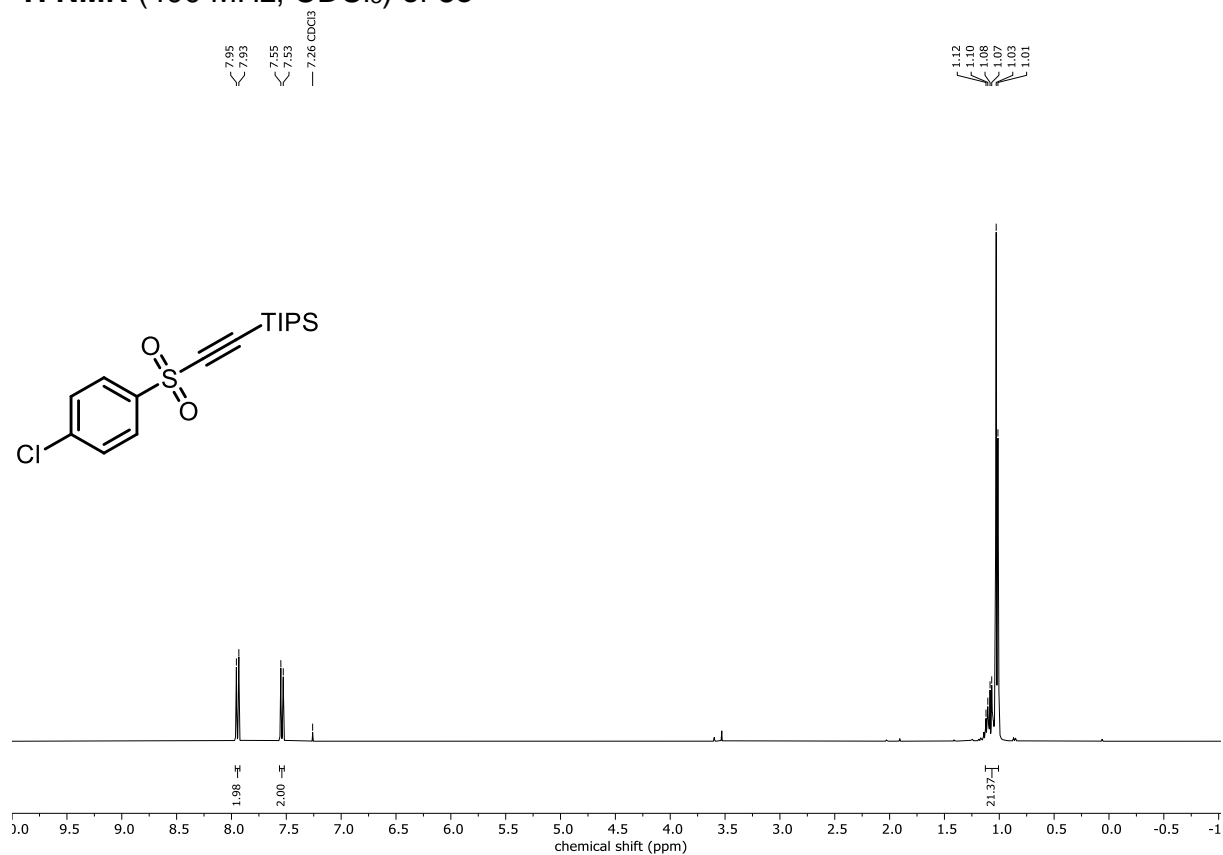

**<sup>13</sup>C NMR (101 MHz, CDCl<sub>3</sub>) of 3e**

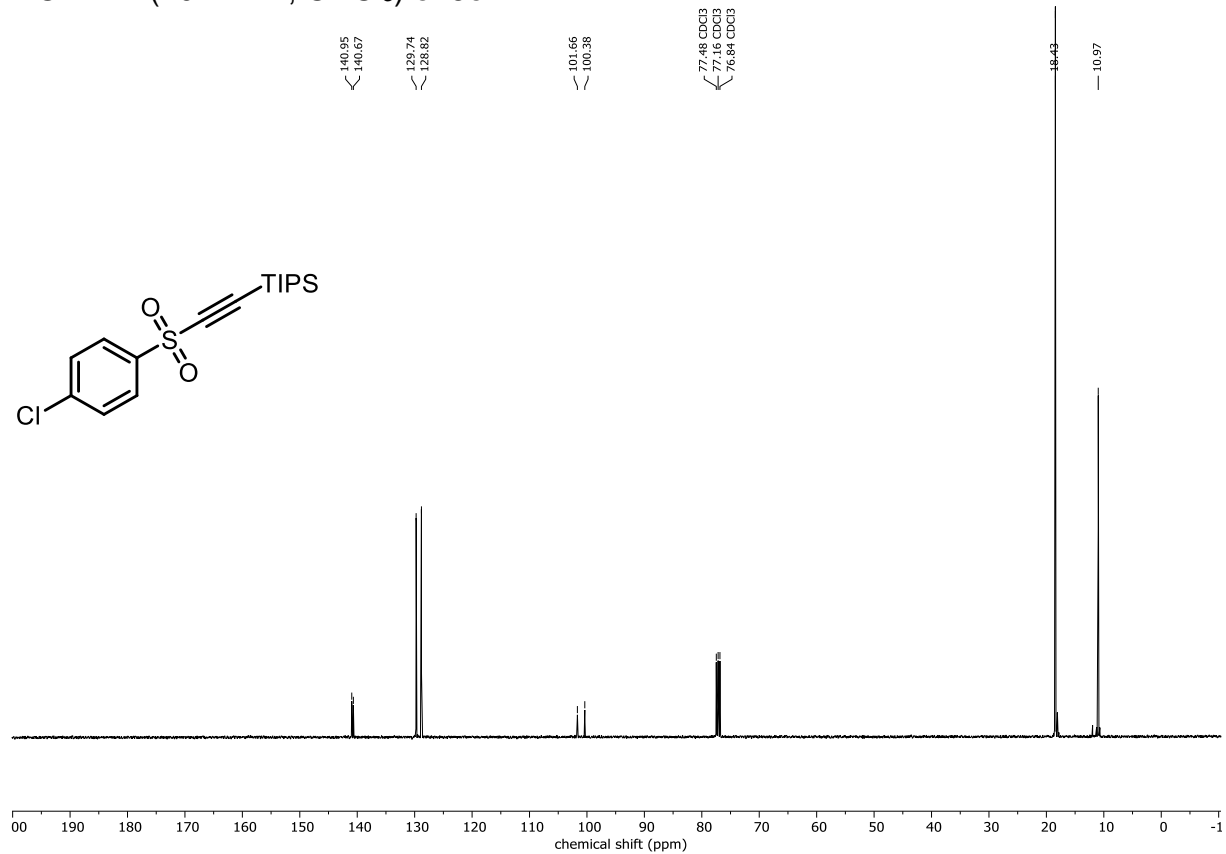



### $^1\text{H}$ NMR (400 MHz, $\text{CDCl}_3$ ) of **3f**

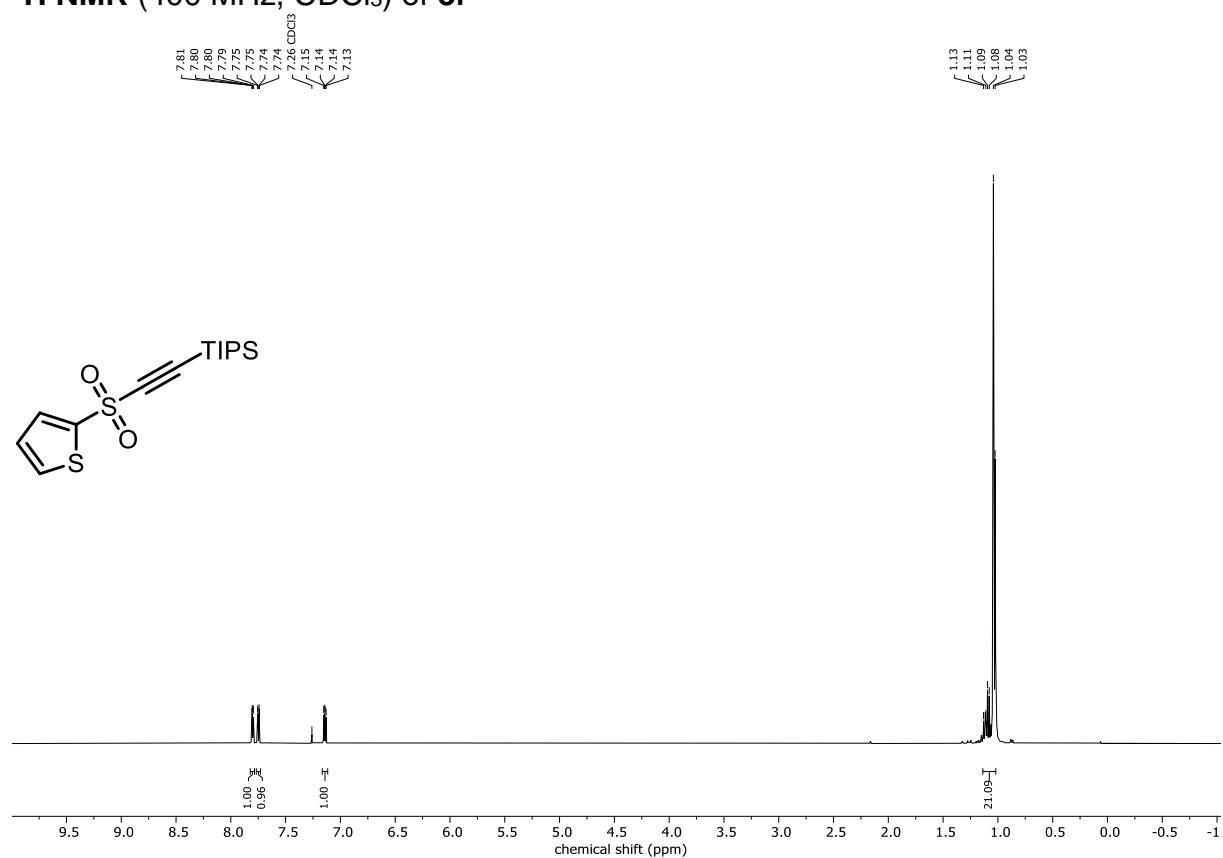

### $^{13}\text{C}$ NMR (101 MHz, $\text{CDCl}_3$ ) of **3f**

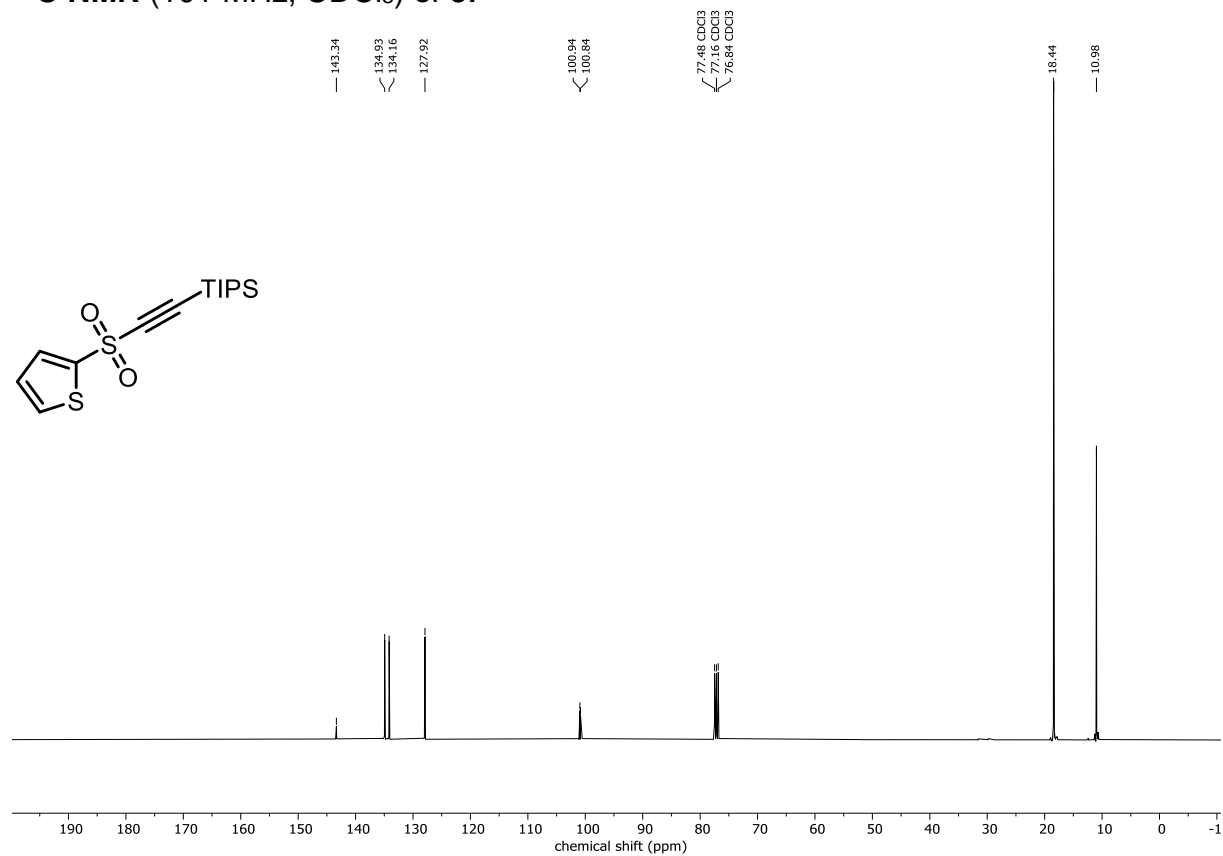

# <sup>1</sup>H NMR (400 MHz, CDCl<sub>3</sub>) of **3g**

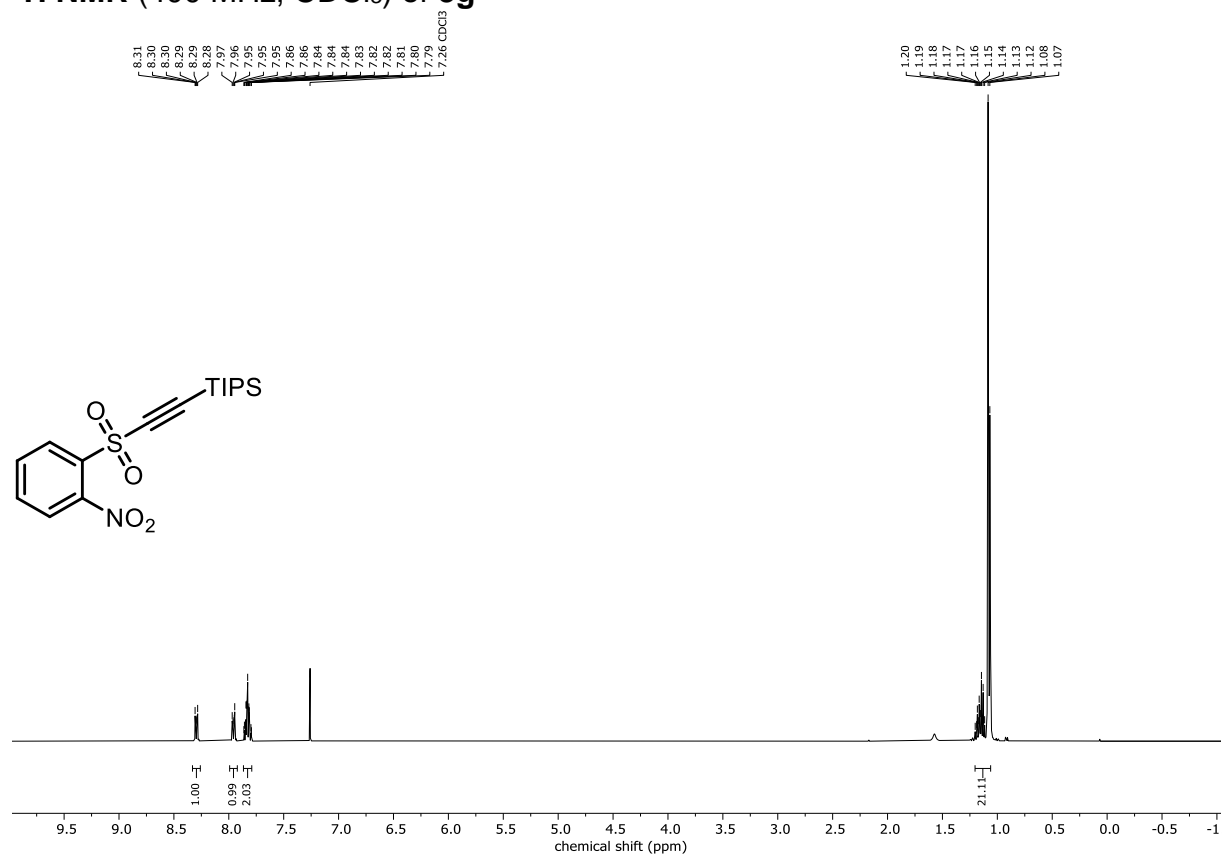

# <sup>13</sup>C NMR (101 MHz, CDCl<sub>3</sub>) of **3g**

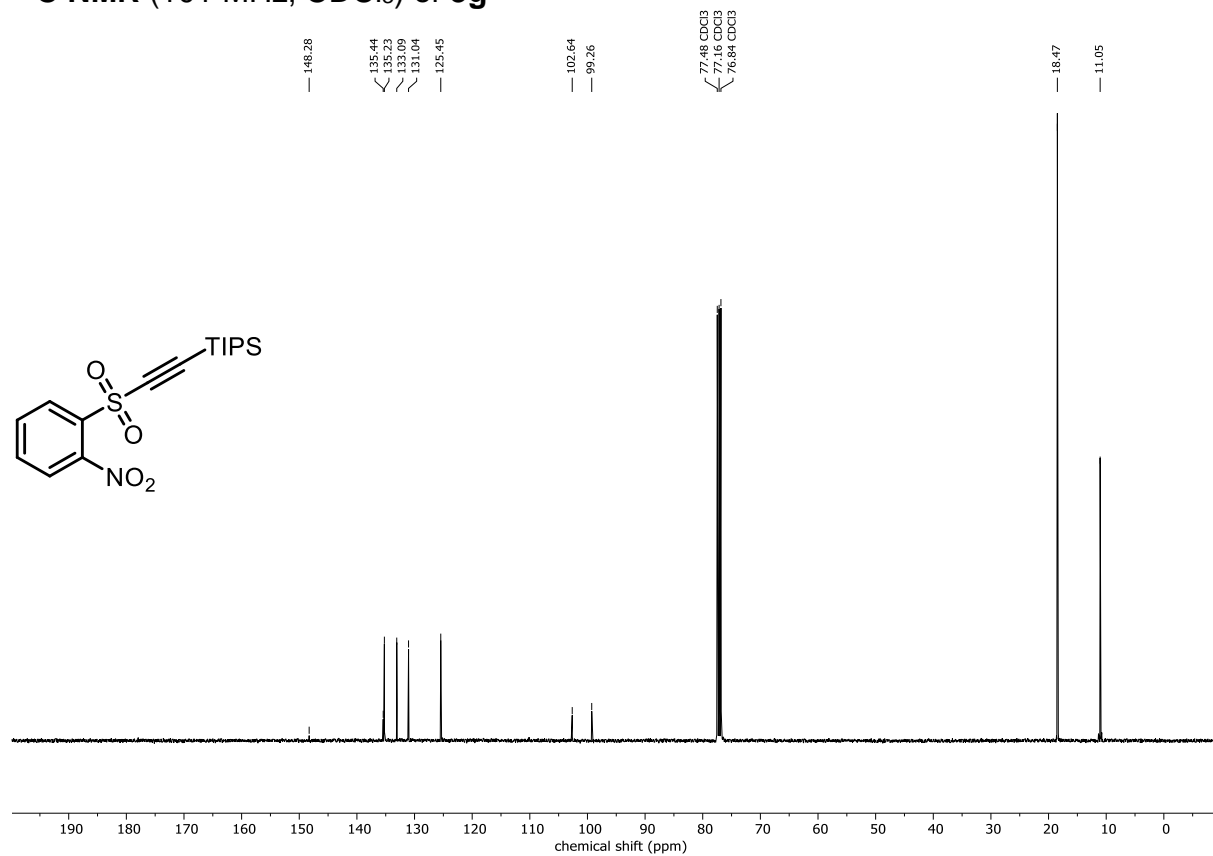

**<sup>1</sup>H NMR (400 MHz, CDCl<sub>3</sub>) of 3h**

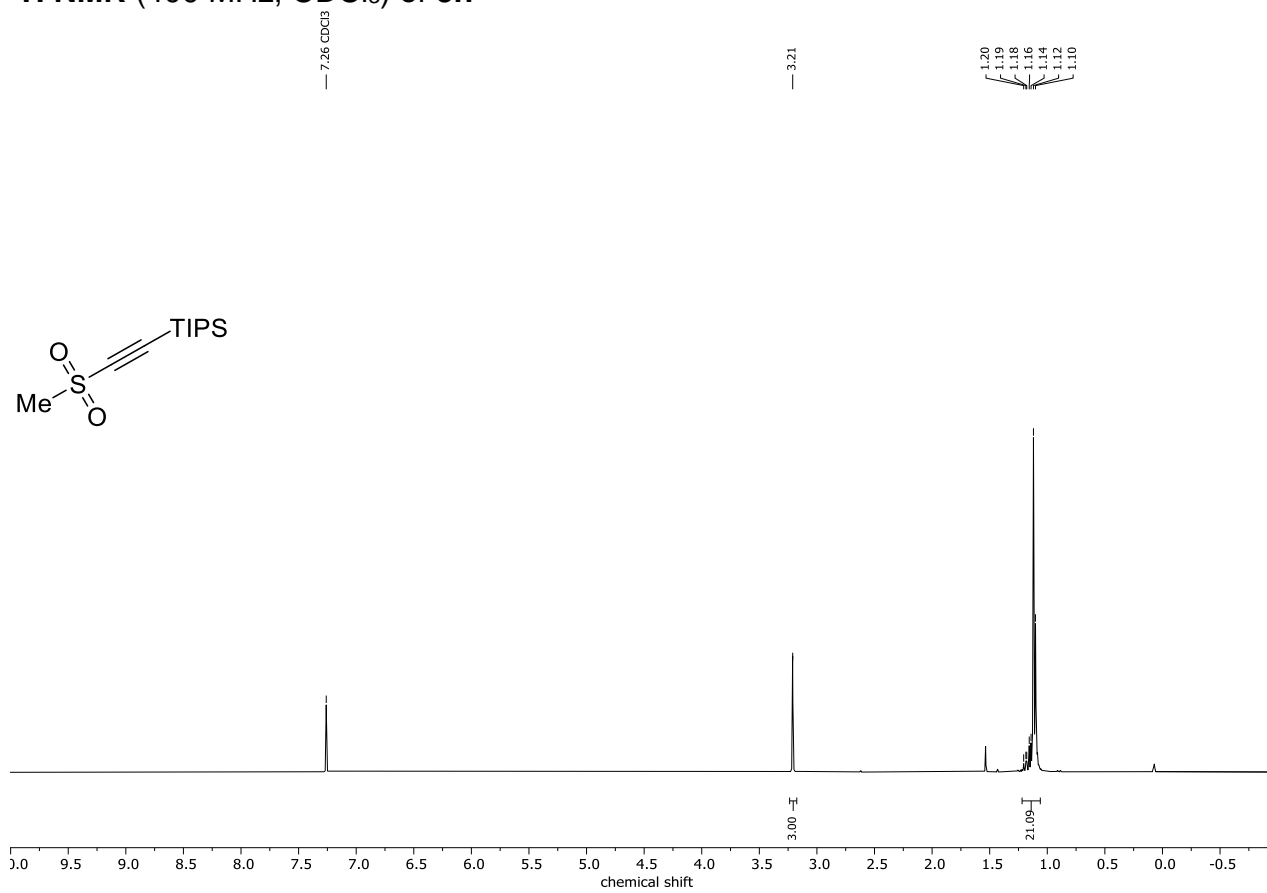

**<sup>13</sup>C NMR (101 MHz, CDCl<sub>3</sub>) of 3h**

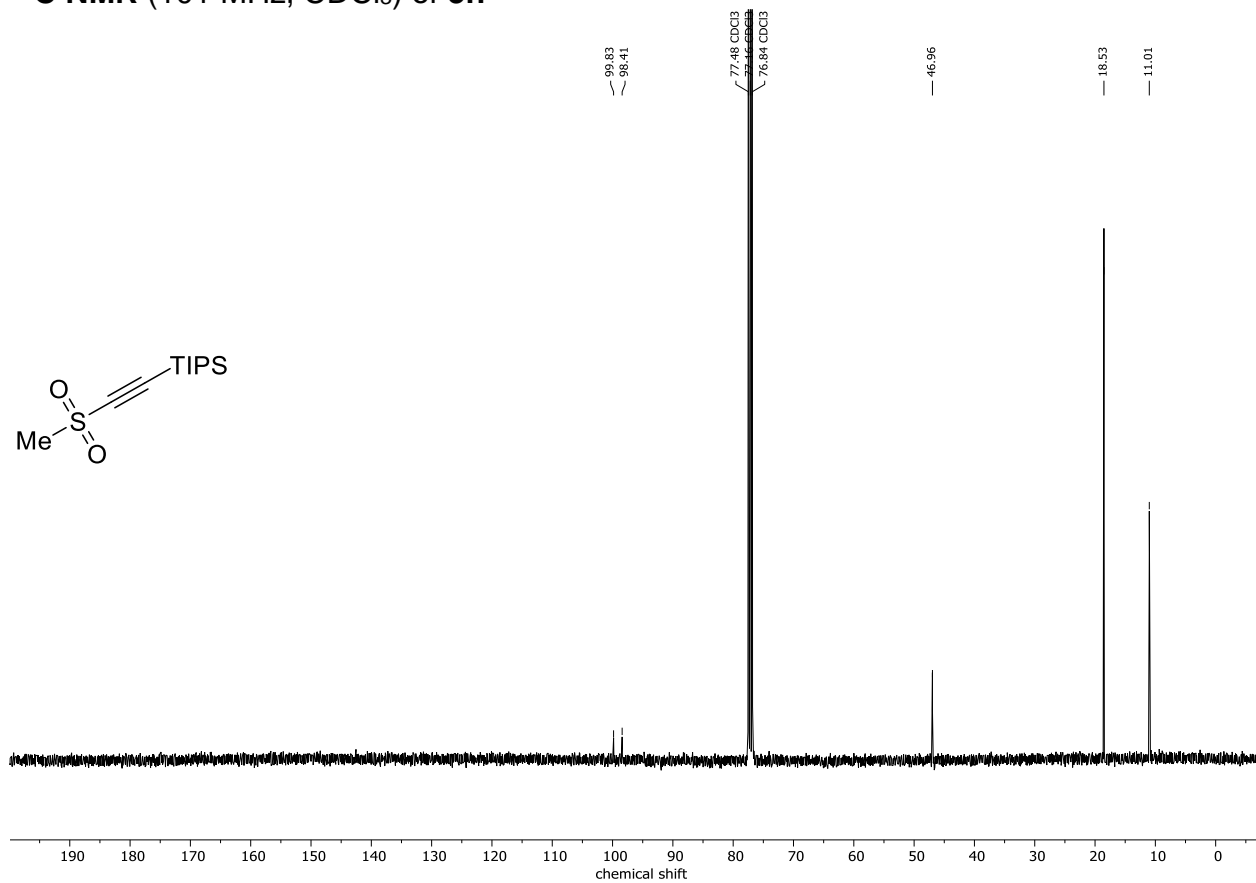

# <sup>1</sup>H NMR (400 MHz, CDCl<sub>3</sub>) of 4b

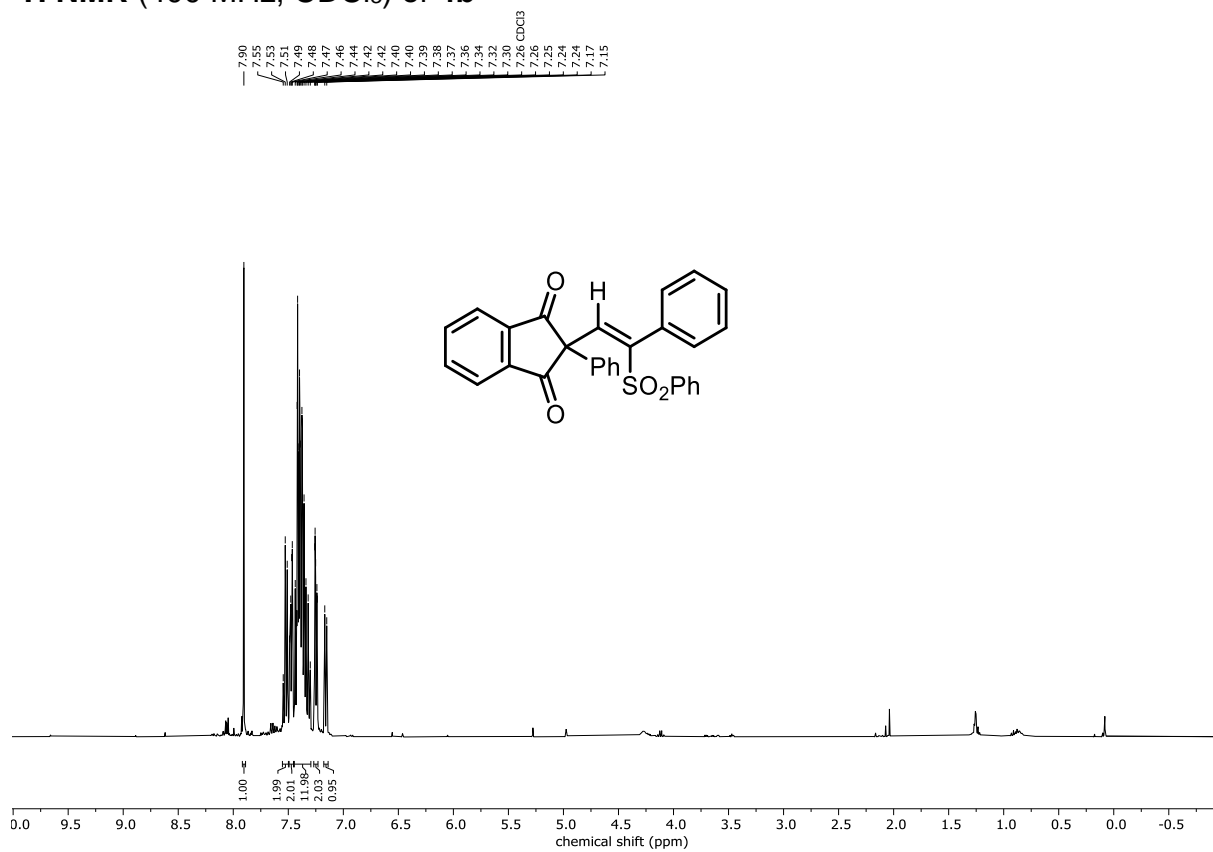

# <sup>13</sup>C NMR (101 MHz, CDCl<sub>3</sub>) of 4b

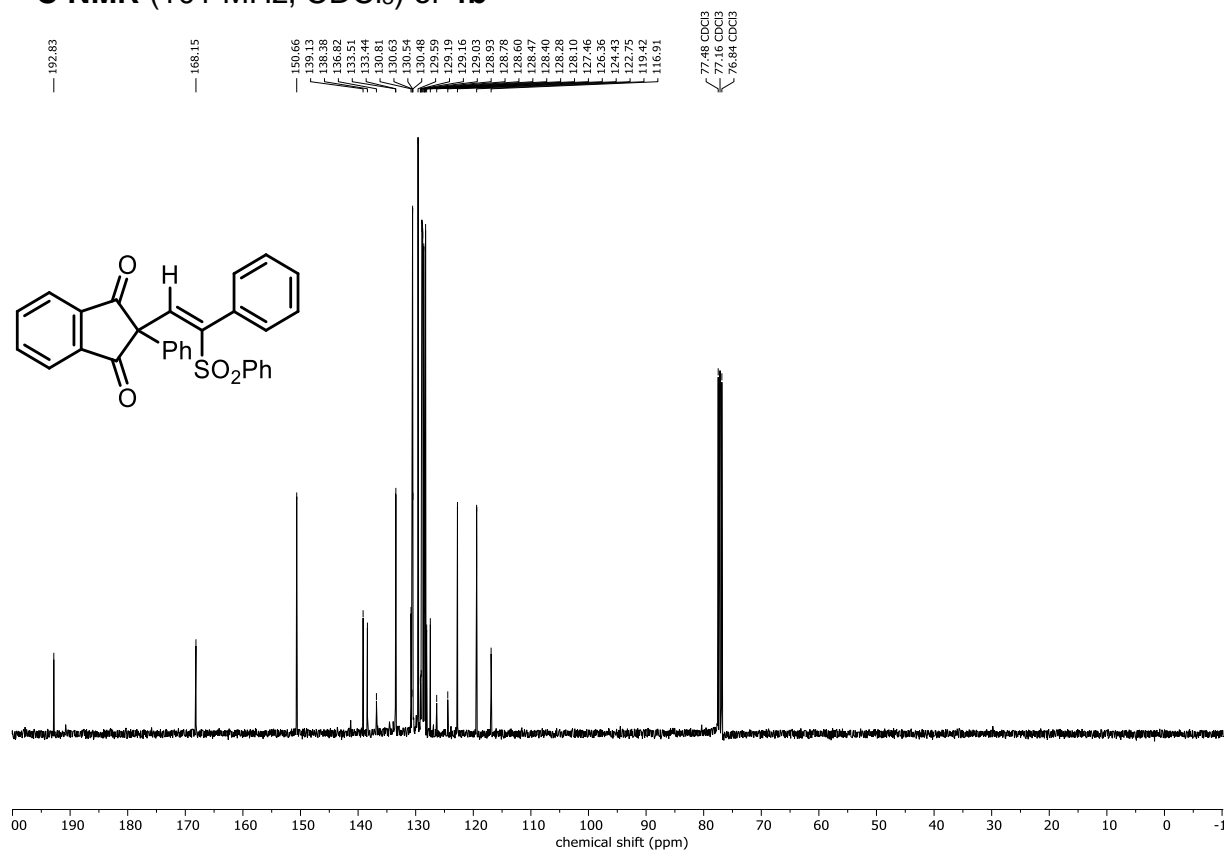

### <sup>1</sup>H NMR (400 MHz, CDCl<sub>3</sub>) of 4c

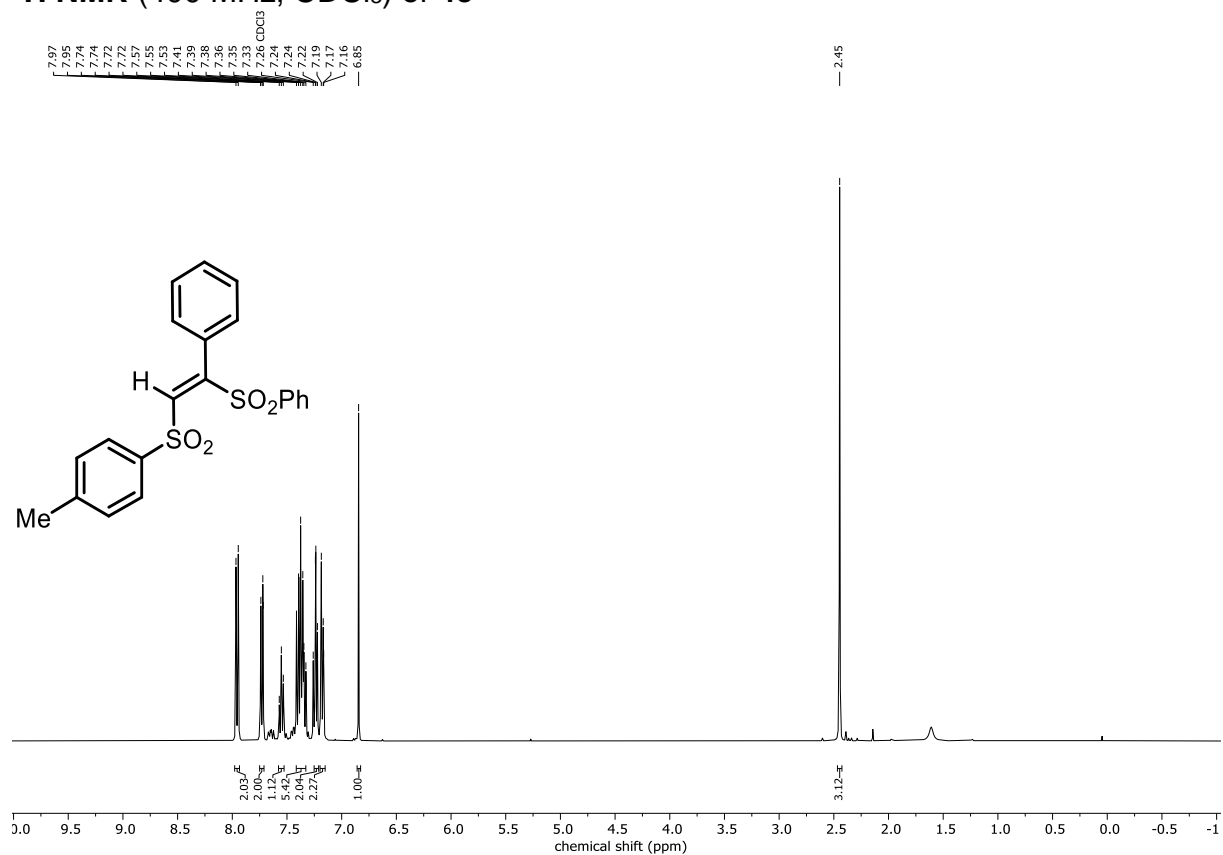

### <sup>13</sup>C NMR (101 MHz, CDCl<sub>3</sub>) of 4c

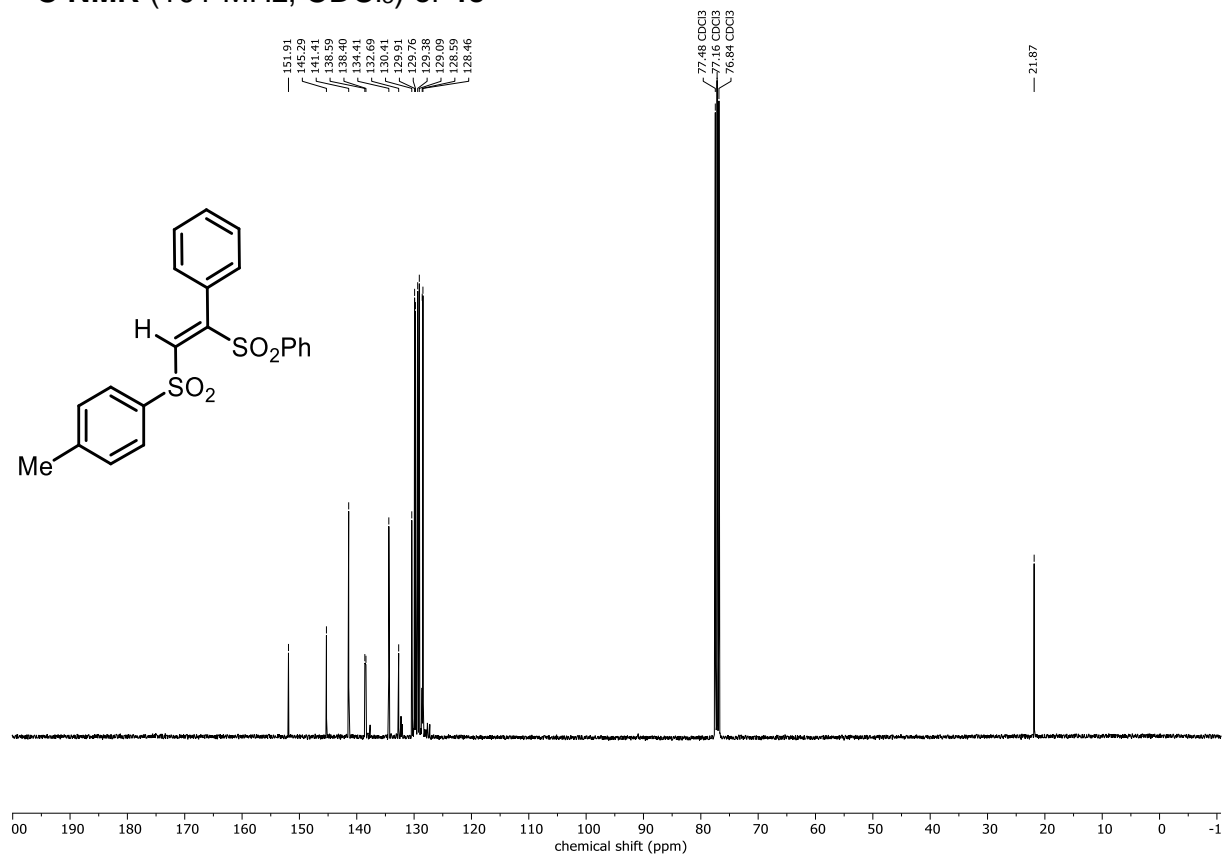

# <sup>1</sup>H NMR (400 MHz, CDCl<sub>3</sub>) of 4d

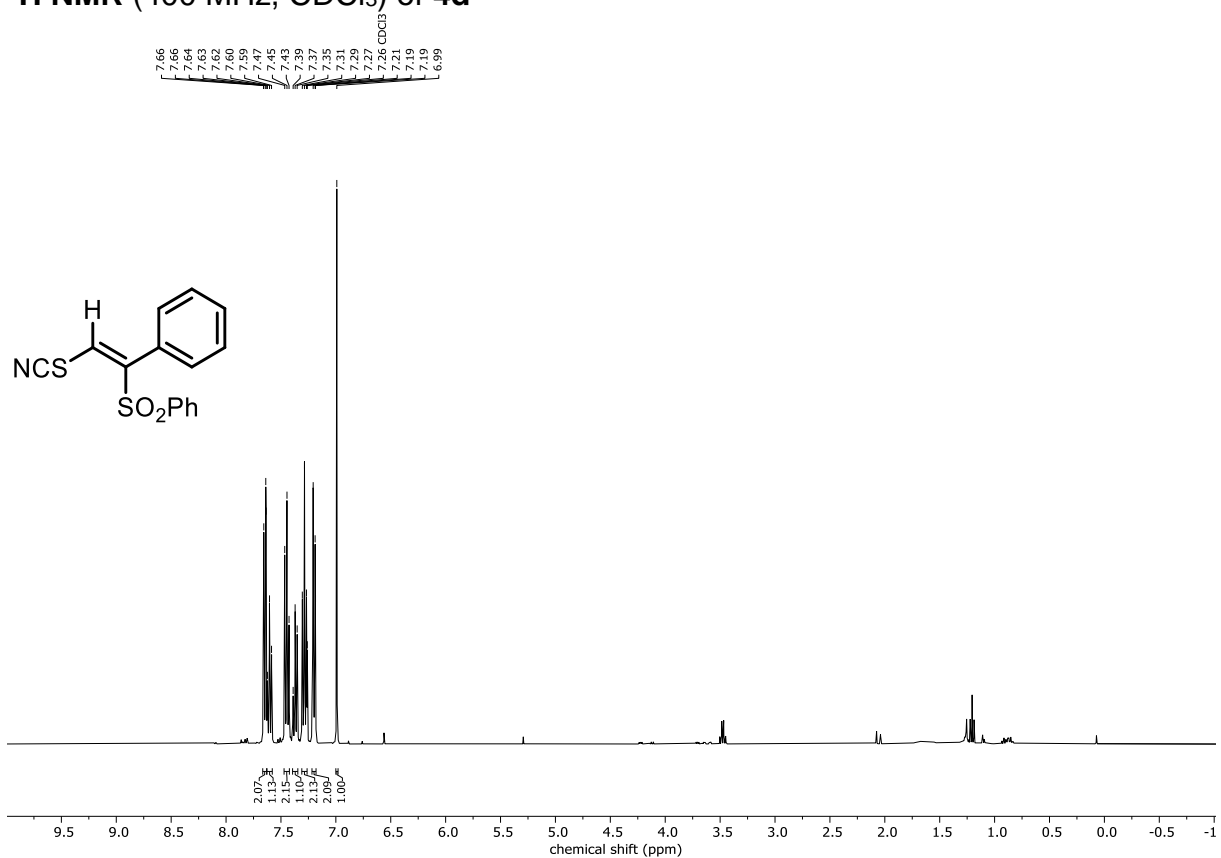

# <sup>13</sup>C NMR (101 MHz, CDCl<sub>3</sub>) of 4d

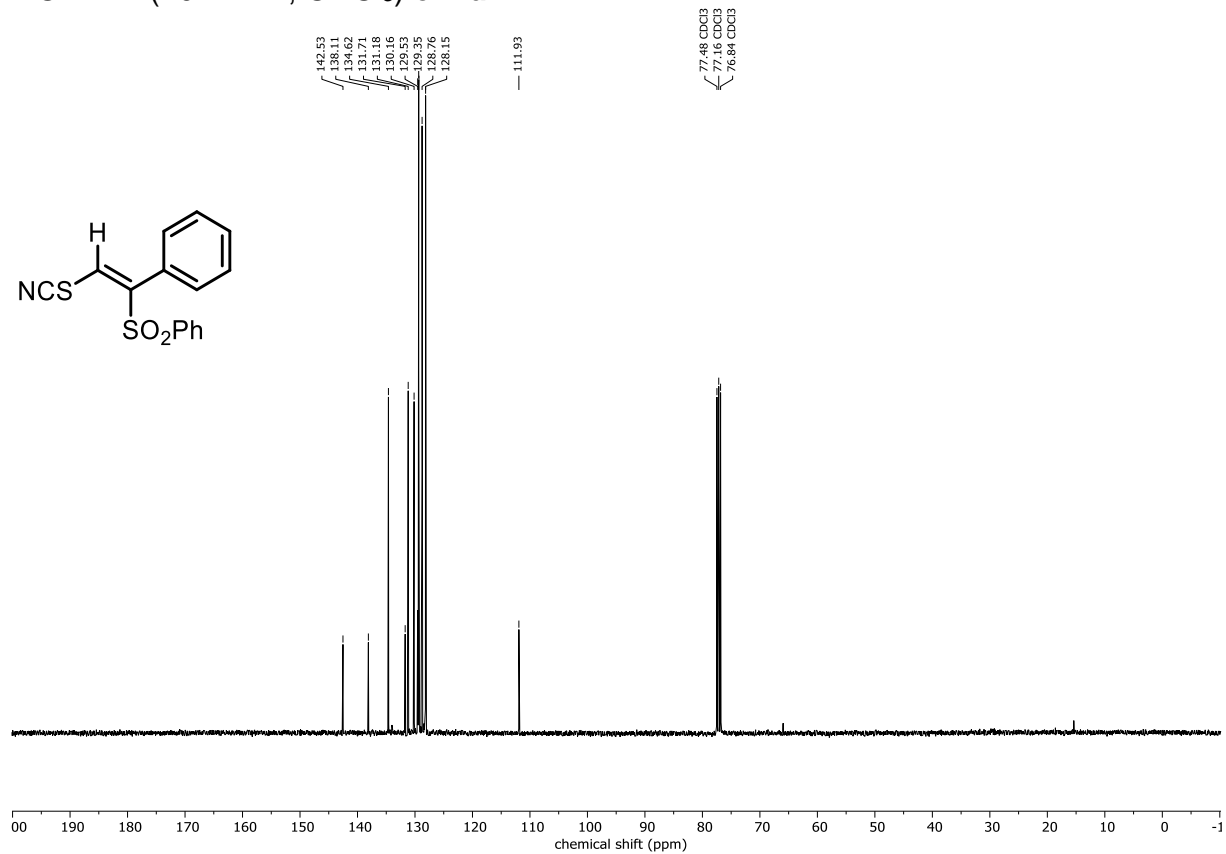

### $^1\text{H}$ NMR (400 MHz, $\text{CD}_3\text{CN}$ ) of **4e**

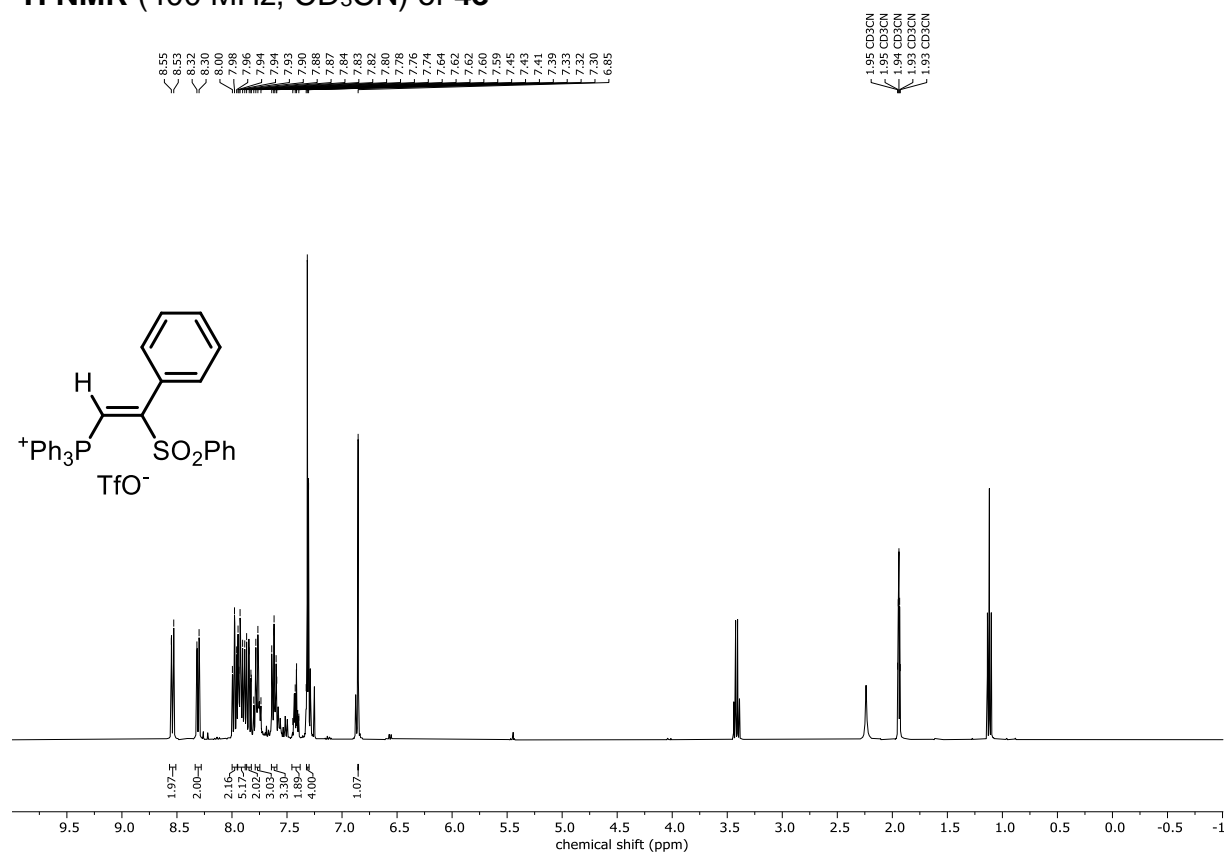

### $^{31}\text{P}$ NMR (162 MHz, $\text{CD}_3\text{CN}$ ) of **4e**

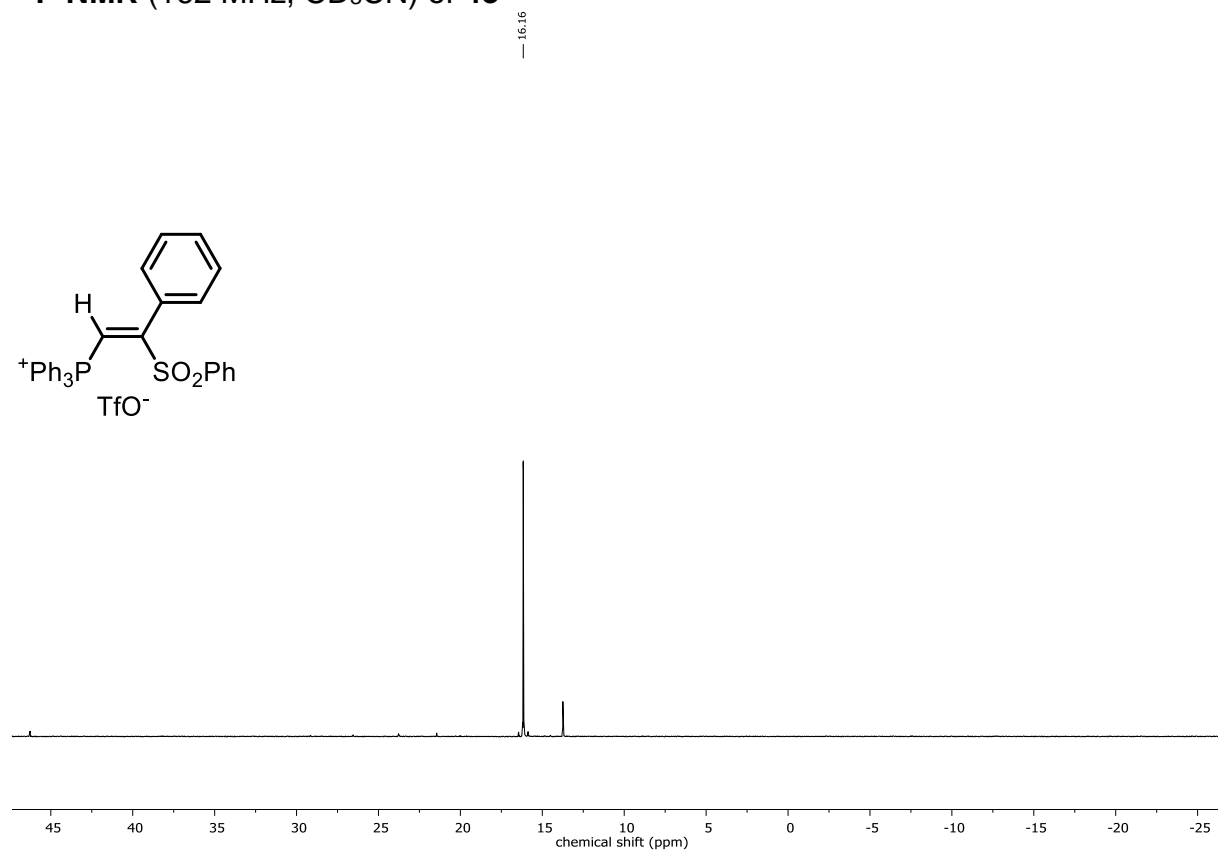

**<sup>13</sup>C NMR (101 MHz, CD<sub>3</sub>CN) of 4e**

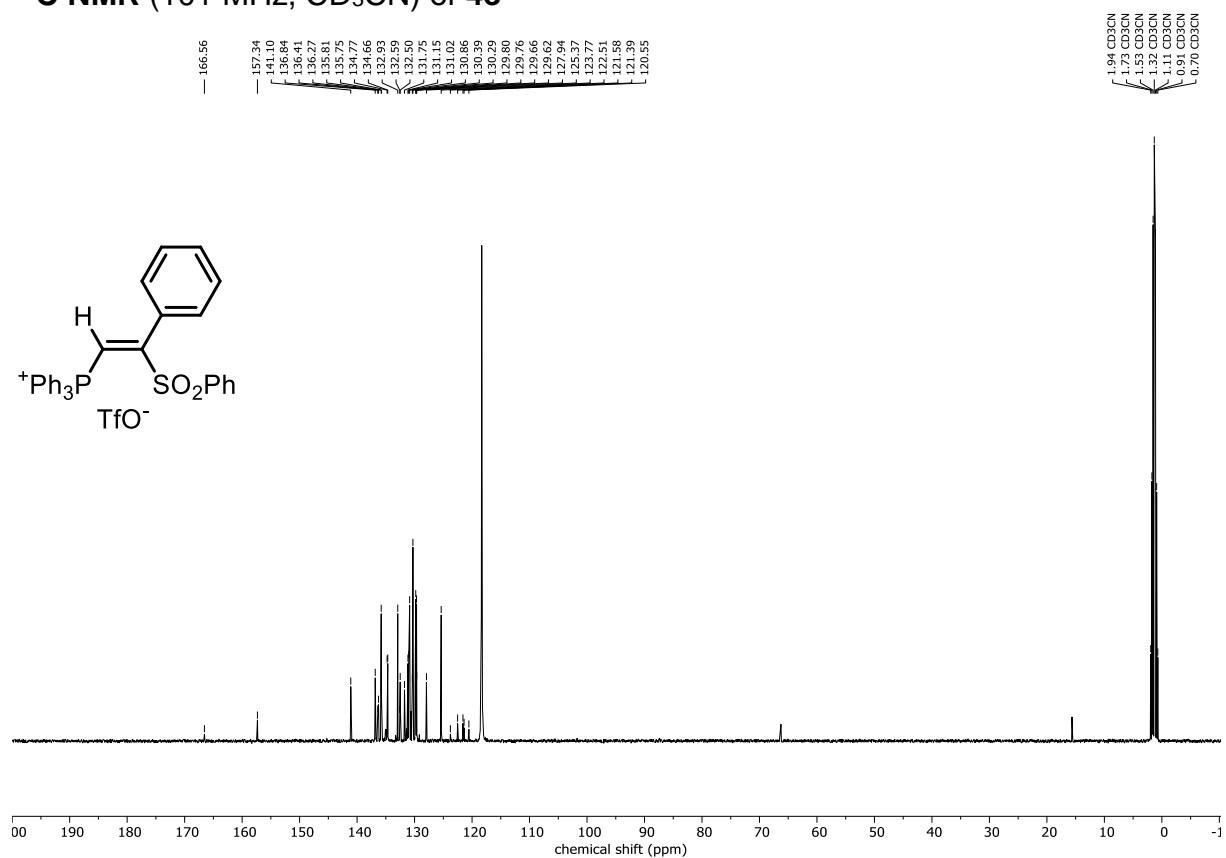



# <sup>1</sup>H NMR (400 MHz, CDCl<sub>3</sub>) of 4f

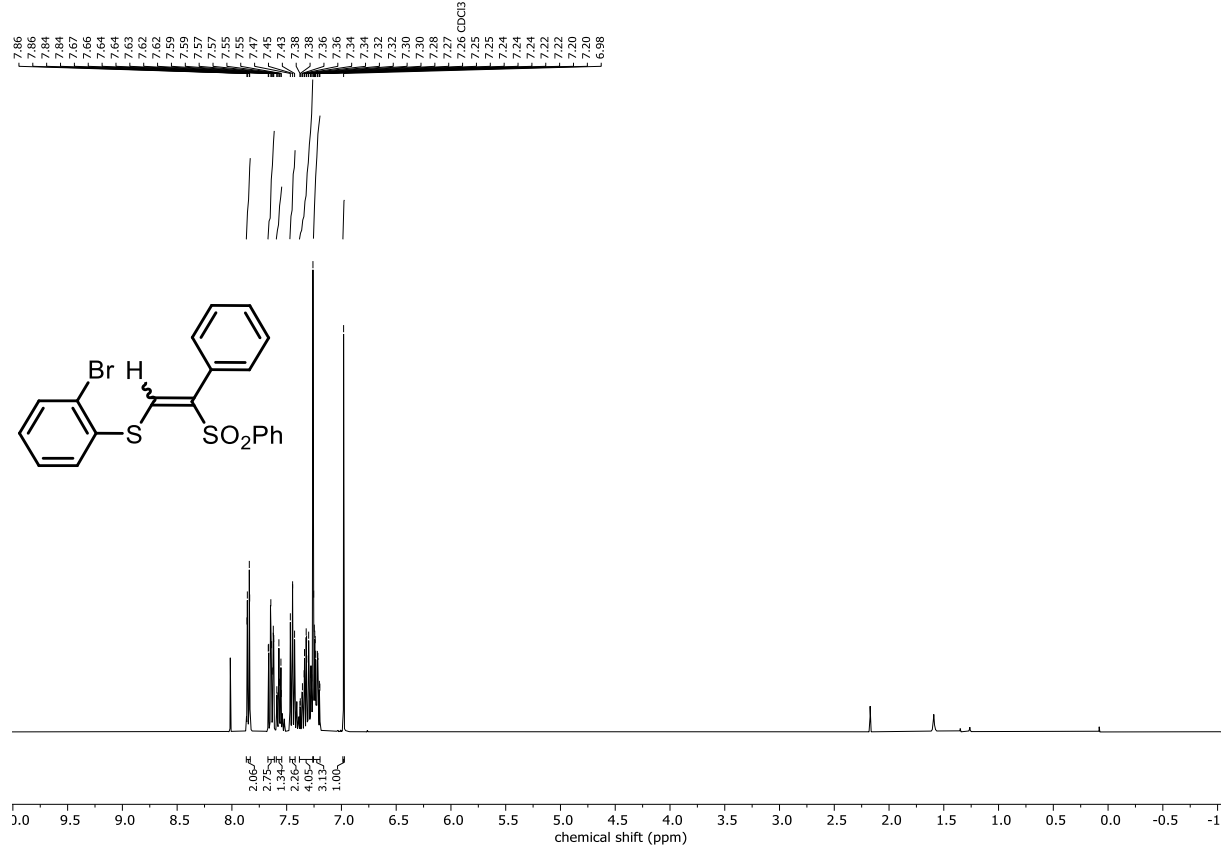

# <sup>13</sup>C NMR (101 MHz, CDCl<sub>3</sub>) of 4f

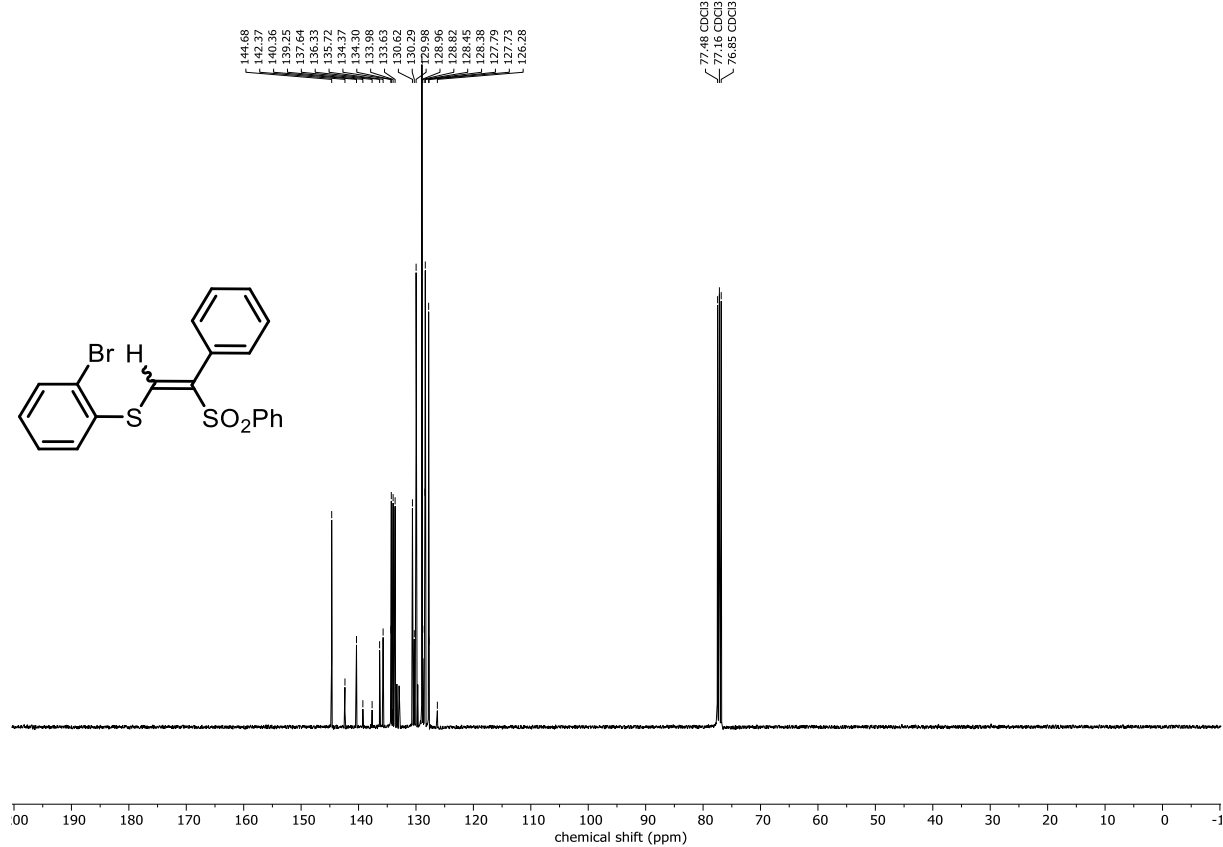

**<sup>1</sup>H NMR (400 MHz, CDCl<sub>3</sub>) of 4g**

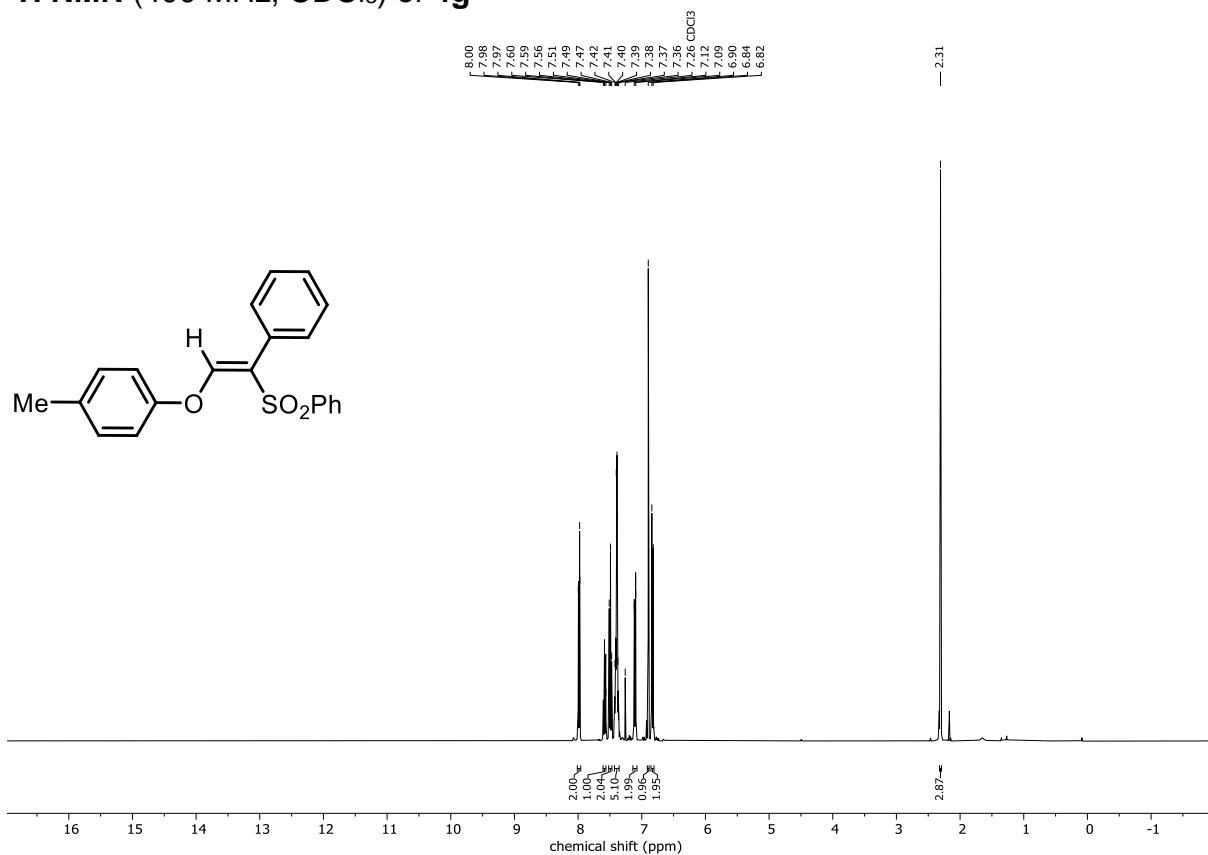

**<sup>13</sup>C NMR (101 MHz, CDCl<sub>3</sub>) of 4g**

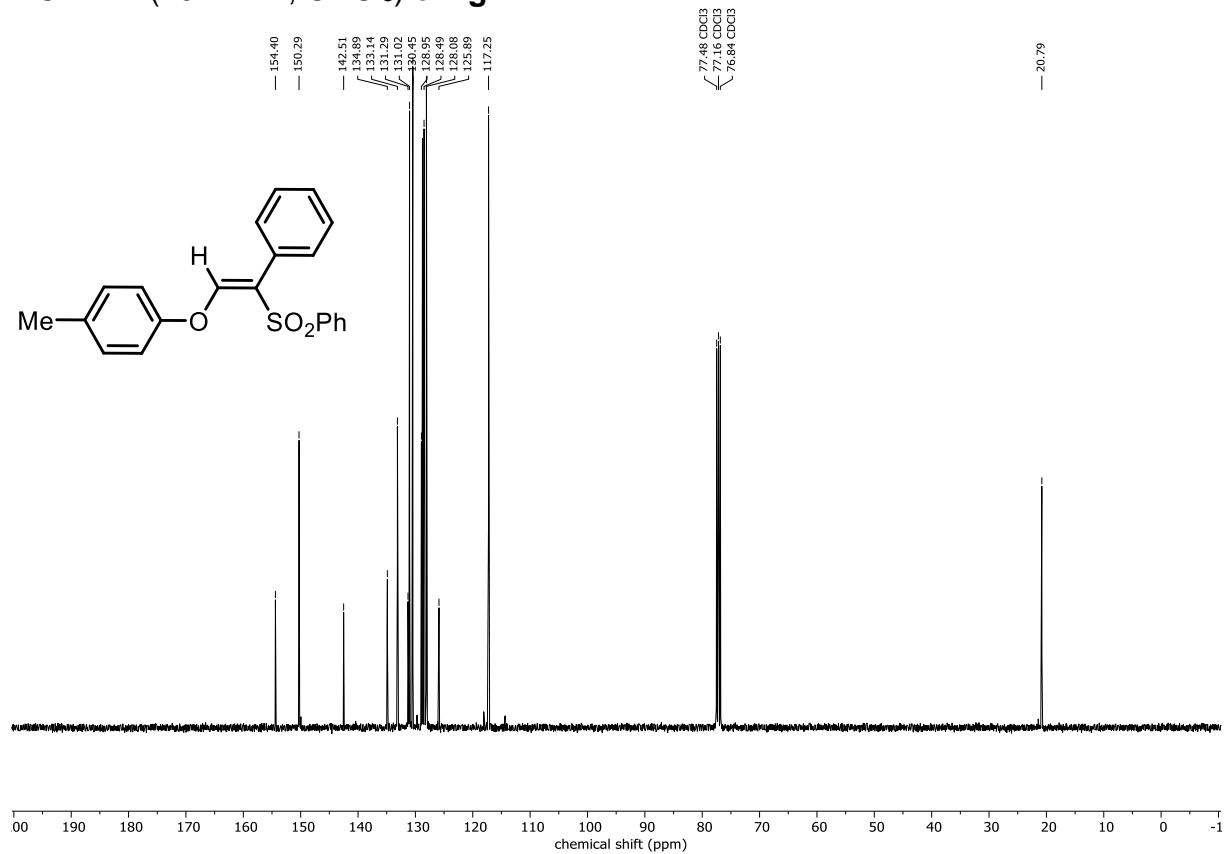

# <sup>1</sup>H NMR (400 MHz, CDCl<sub>3</sub>) of 4h

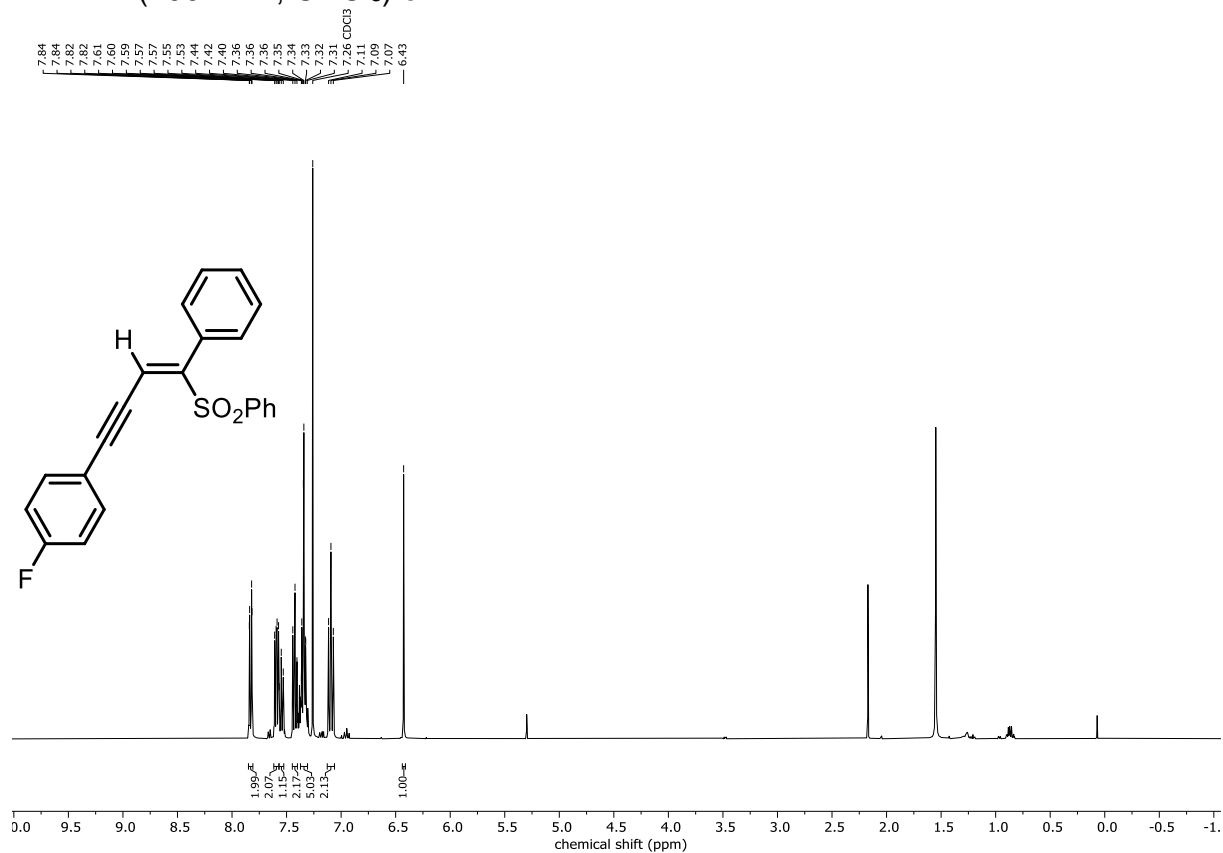

# <sup>19</sup>F NMR (376 MHz, CDCl<sub>3</sub>) of 4h

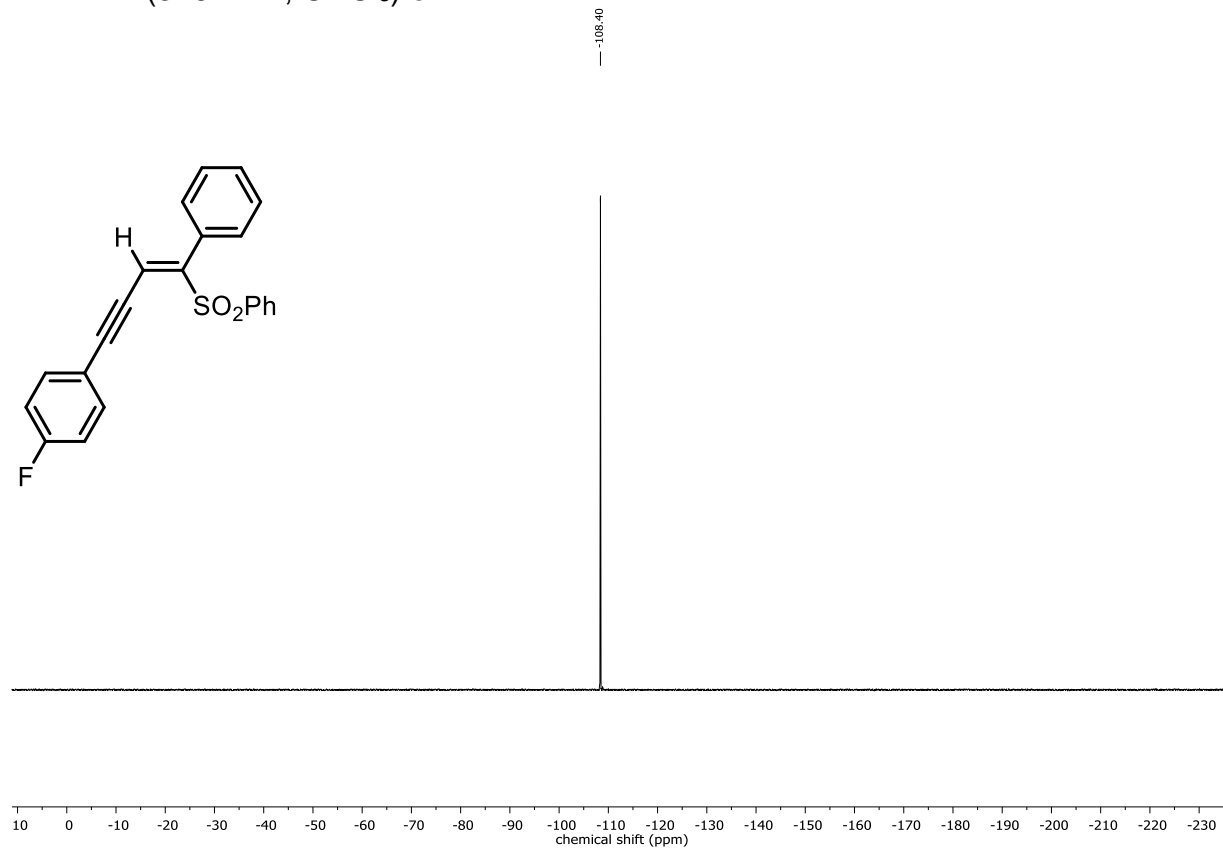

**<sup>13</sup>C NMR (101 MHz, CDCl<sub>3</sub>) of 4h**

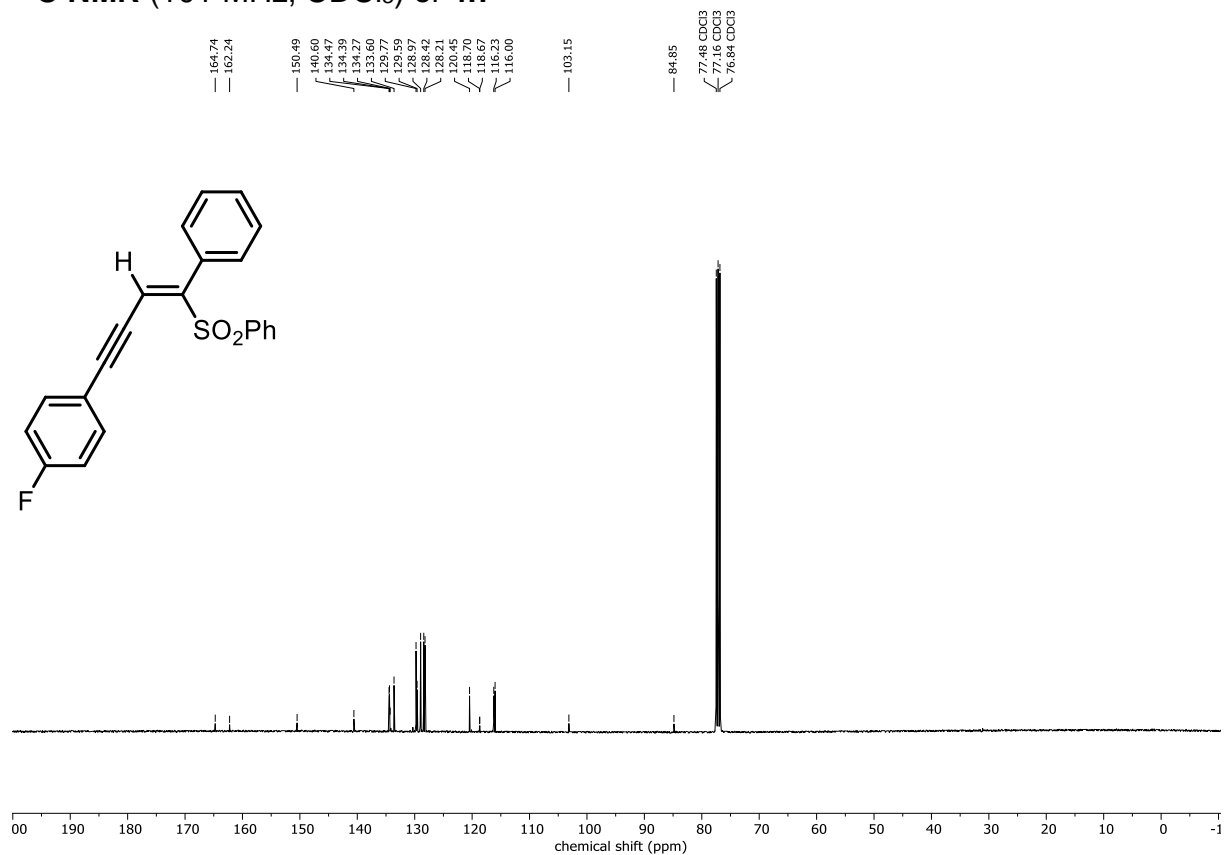

**<sup>1</sup>H NMR (400 MHz, CDCl<sub>3</sub>) of 4h'**

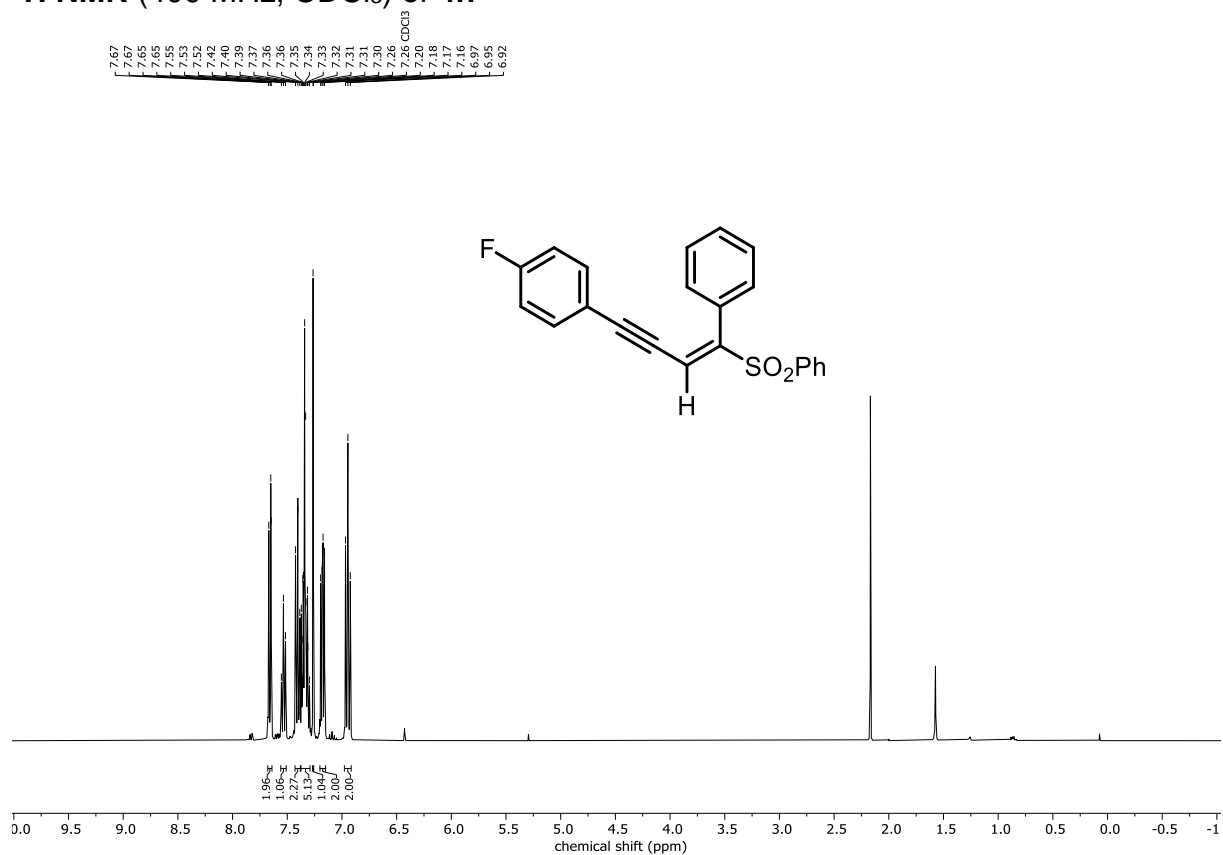

**<sup>19</sup>F NMR (376 MHz, CDCl<sub>3</sub>) of 4h'**

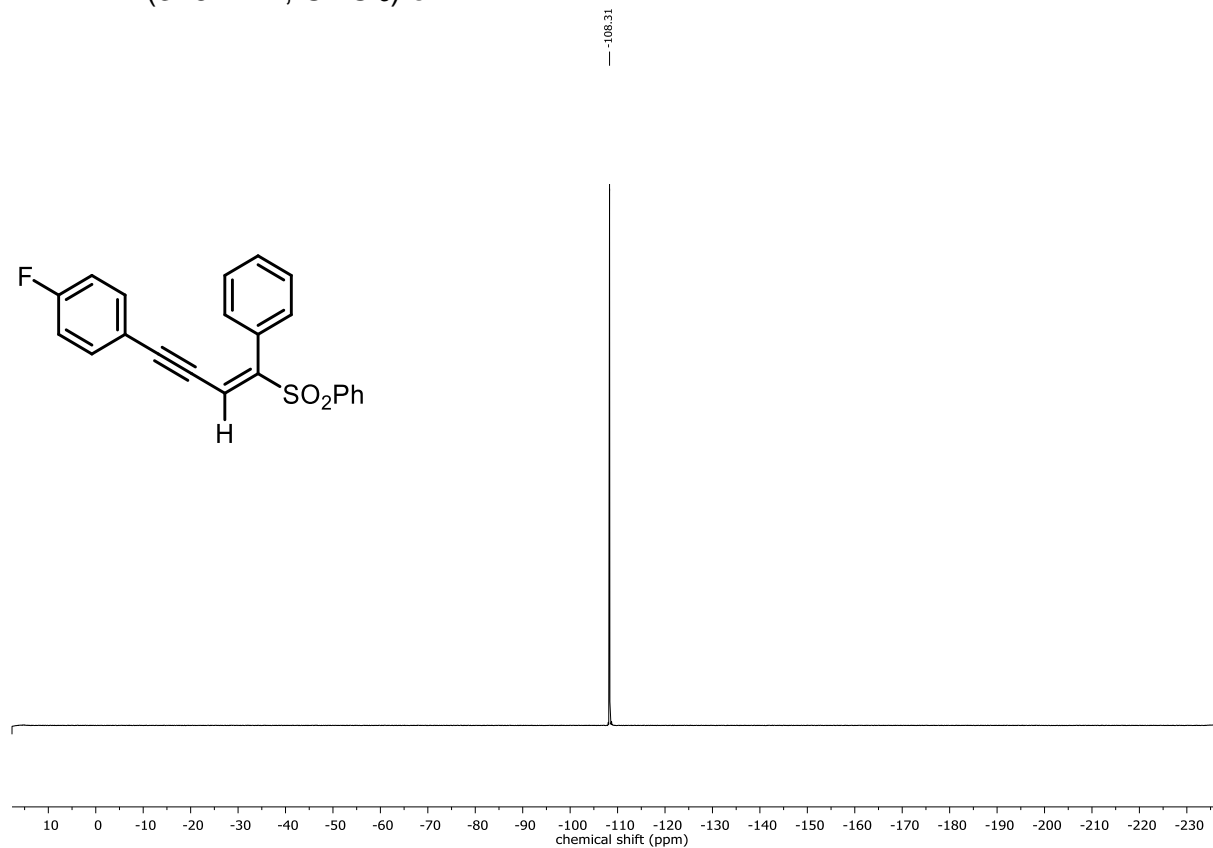

**<sup>13</sup>C NMR (101 MHz, CDCl<sub>3</sub>) of 4h'**

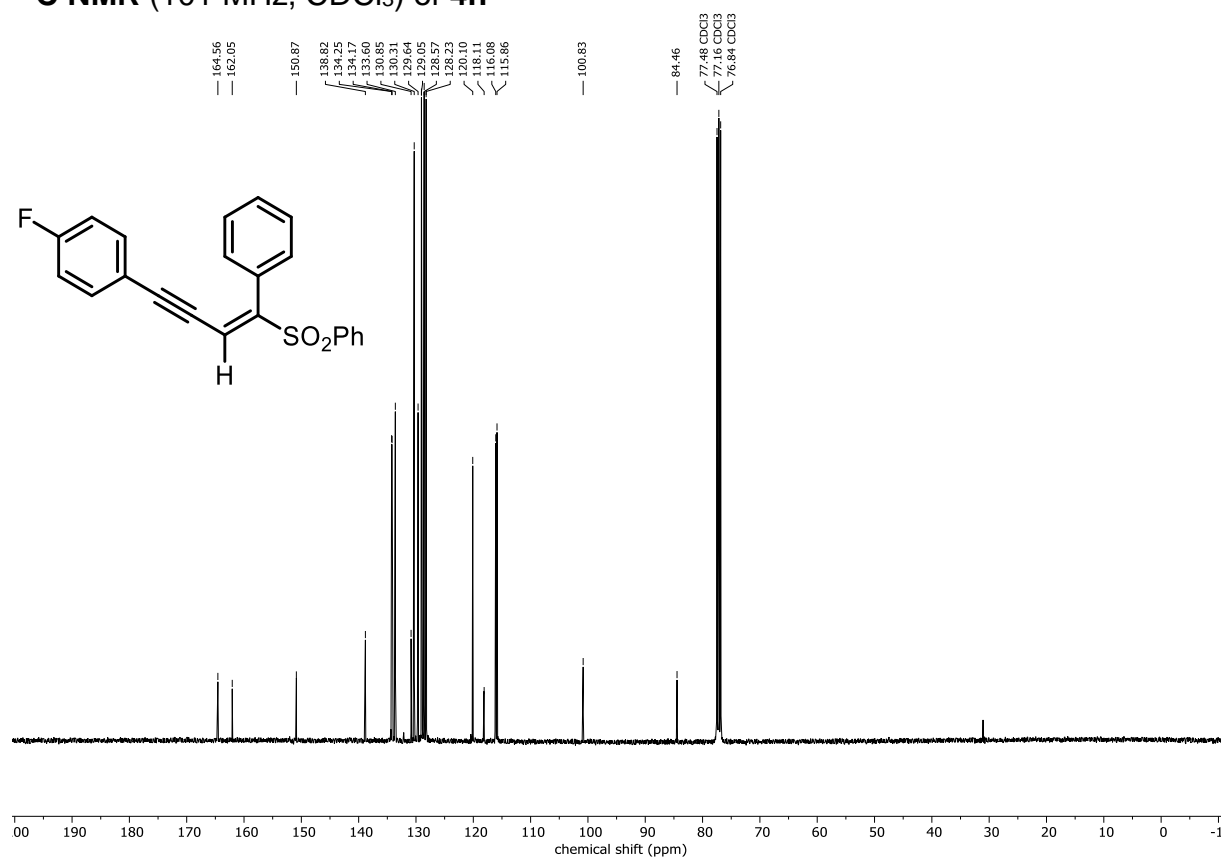

**<sup>1</sup>H NMR (400 MHz, CDCl<sub>3</sub>) of 4i**

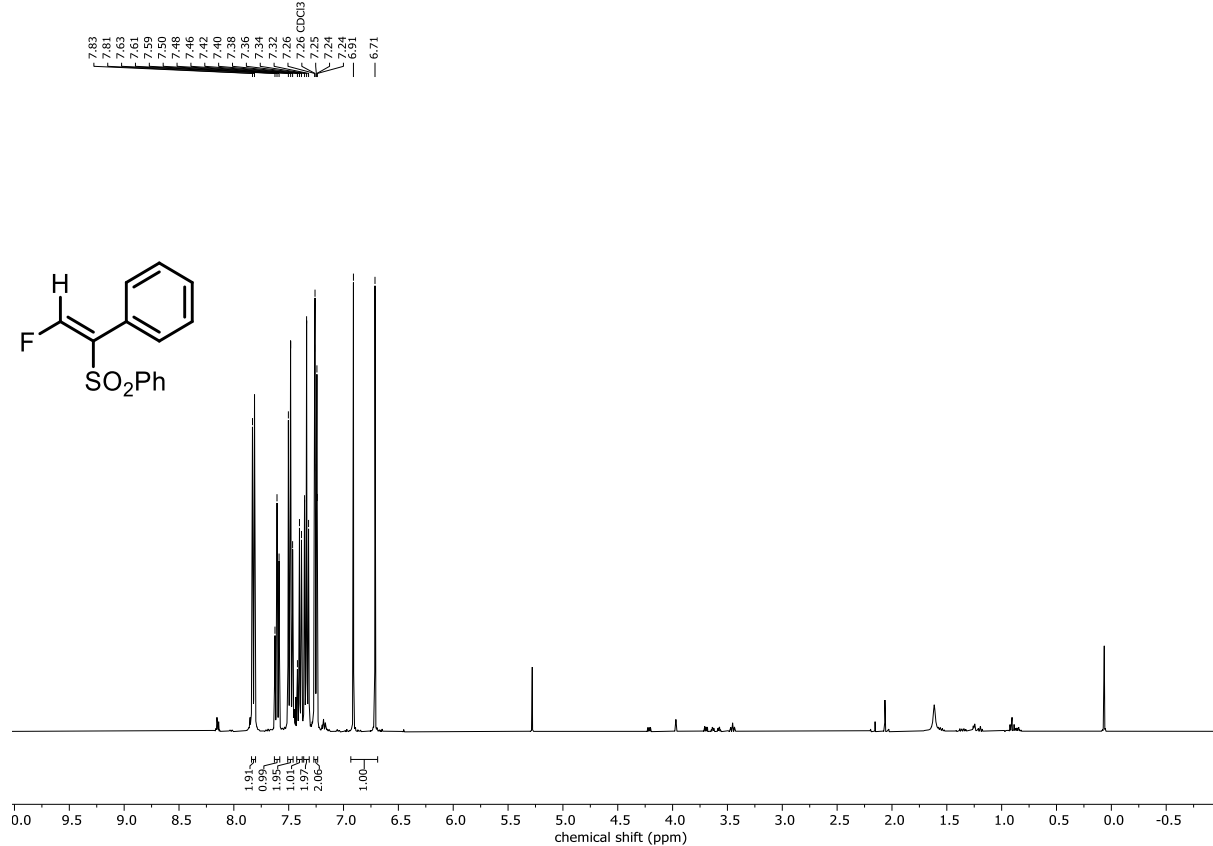

**<sup>19</sup>F NMR (376 MHz, CDCl<sub>3</sub>) of 4i**

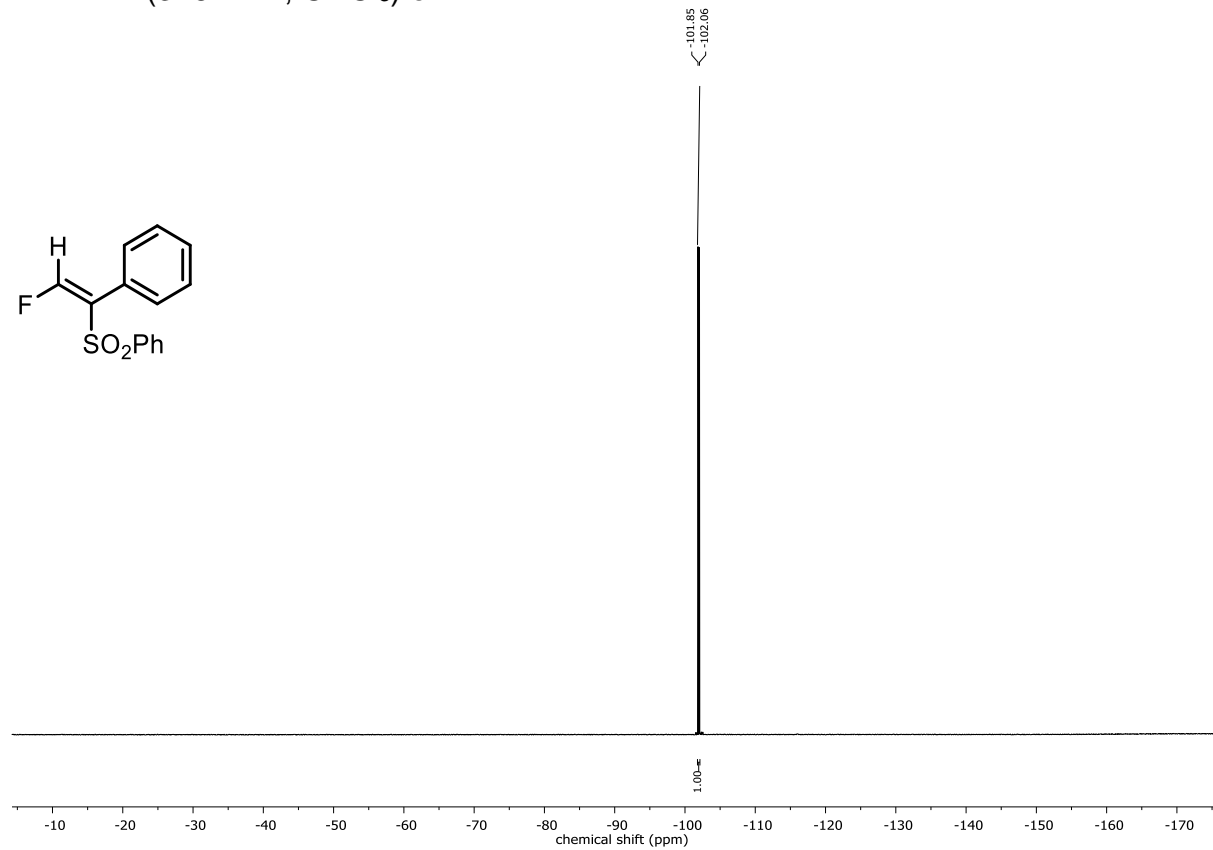

<sup>13</sup>C NMR (101 MHz, CDCl<sub>3</sub>) of **4i**

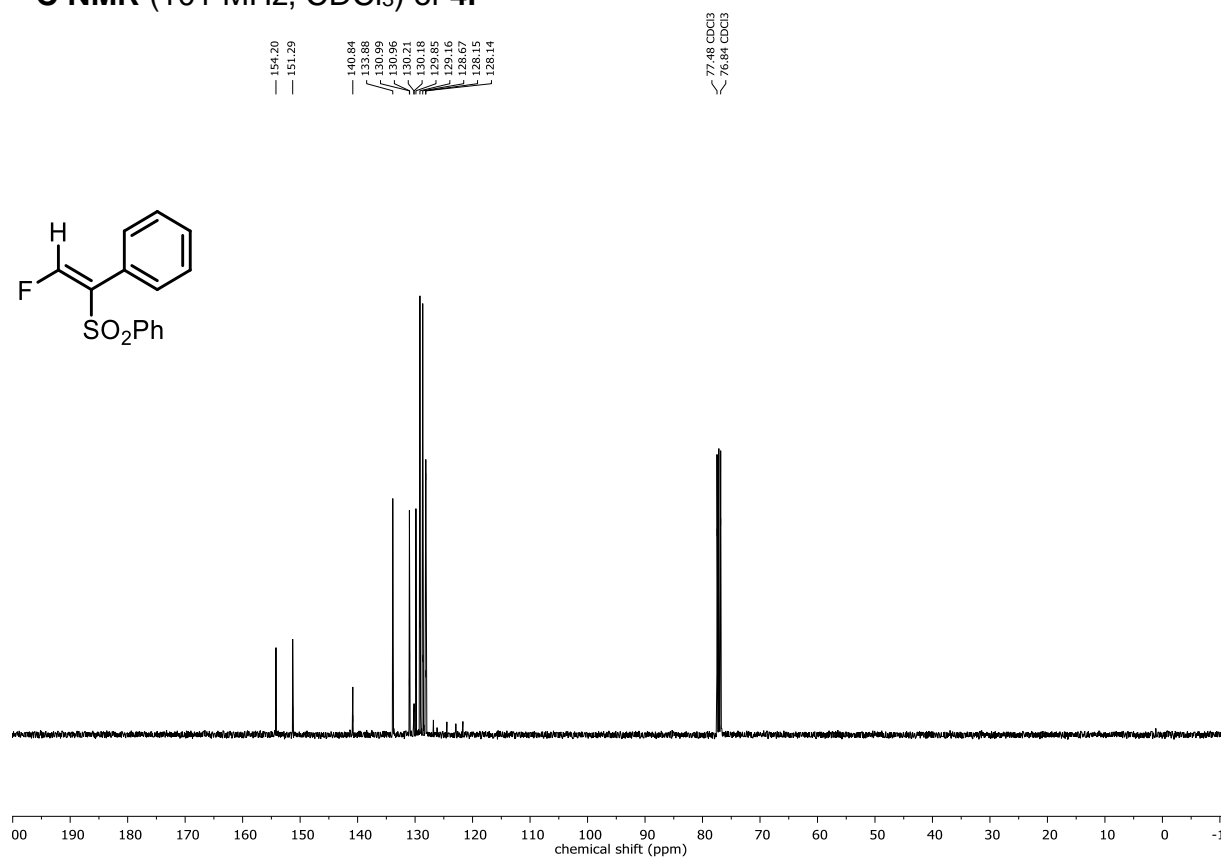



**<sup>1</sup>H NMR (400 MHz, CDCl<sub>3</sub>) of 4j**

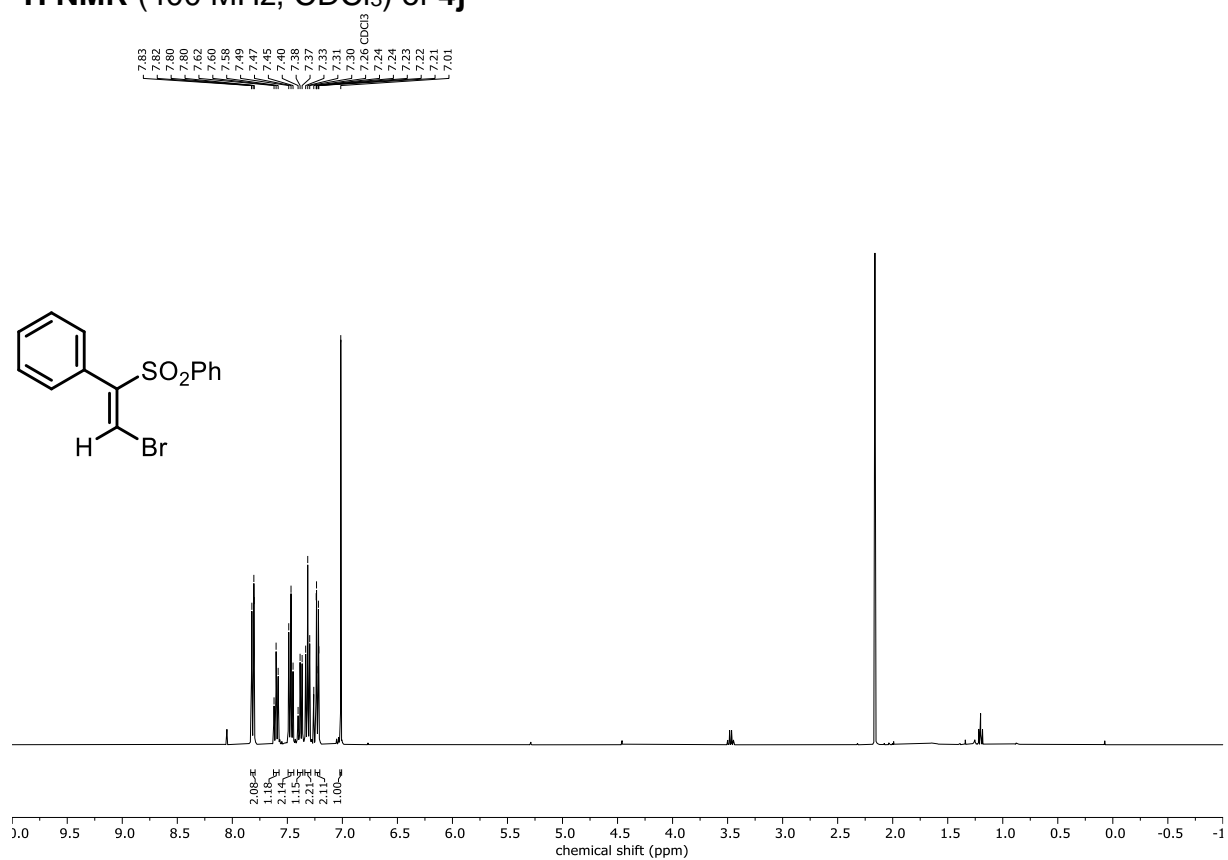

**<sup>13</sup>C NMR (101 MHz, CDCl<sub>3</sub>) of 4j**

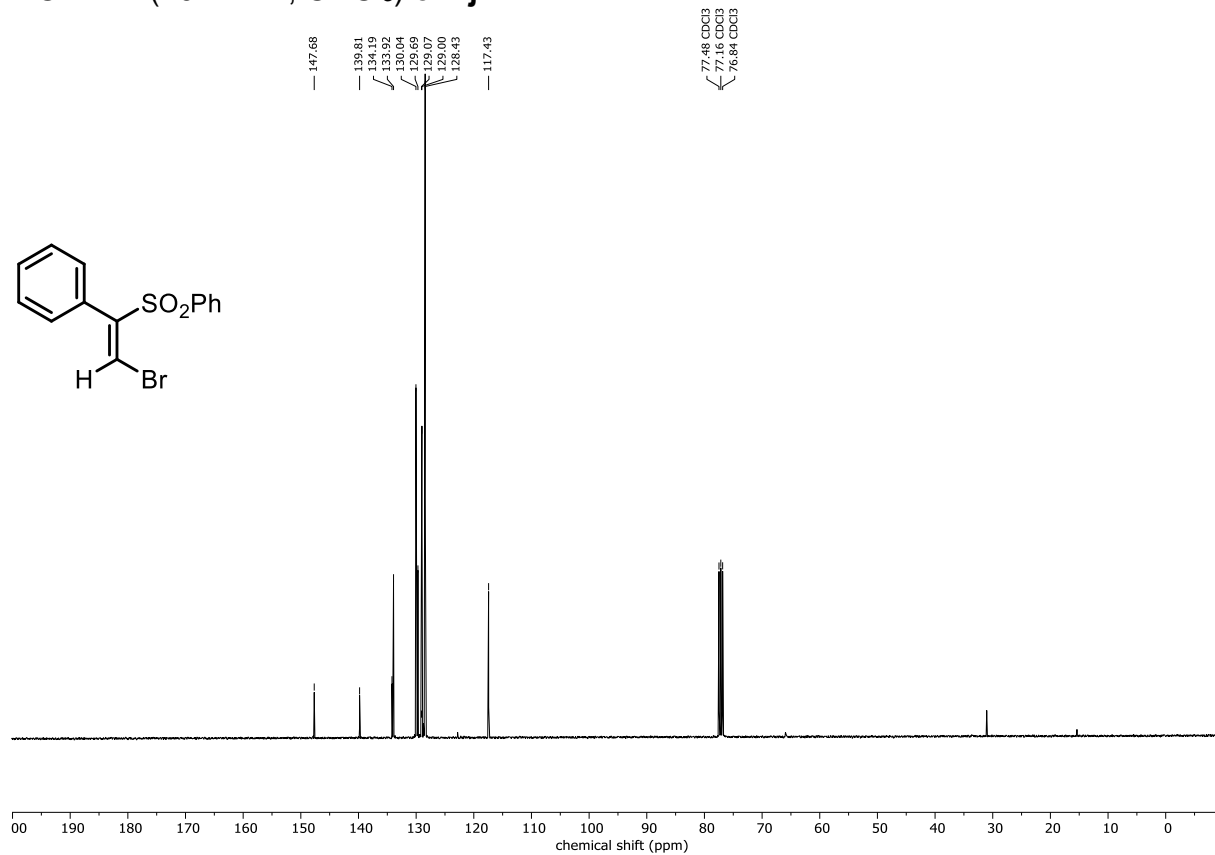

# <sup>1</sup>H NMR (400 MHz, CDCl<sub>3</sub>) of 4k

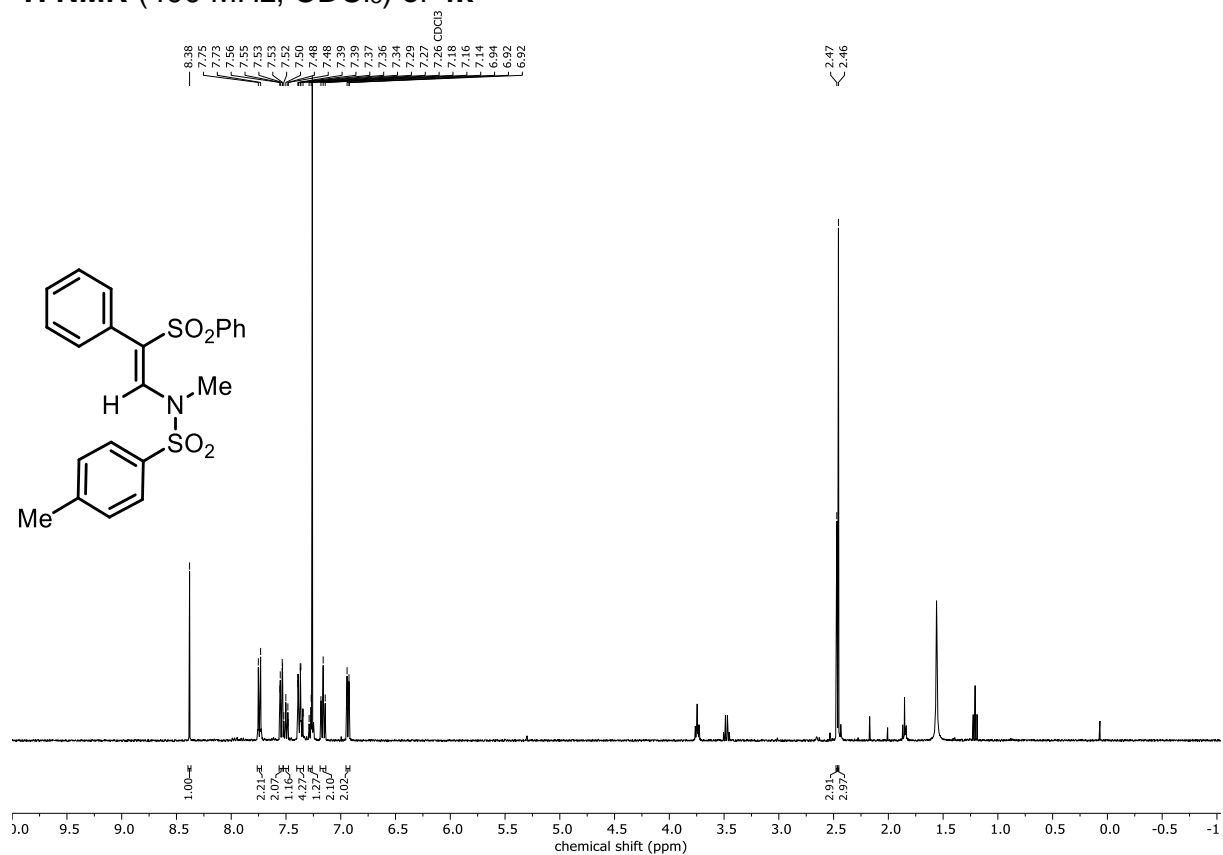

# <sup>13</sup>C NMR (101 MHz, CDCl<sub>3</sub>) of 4k

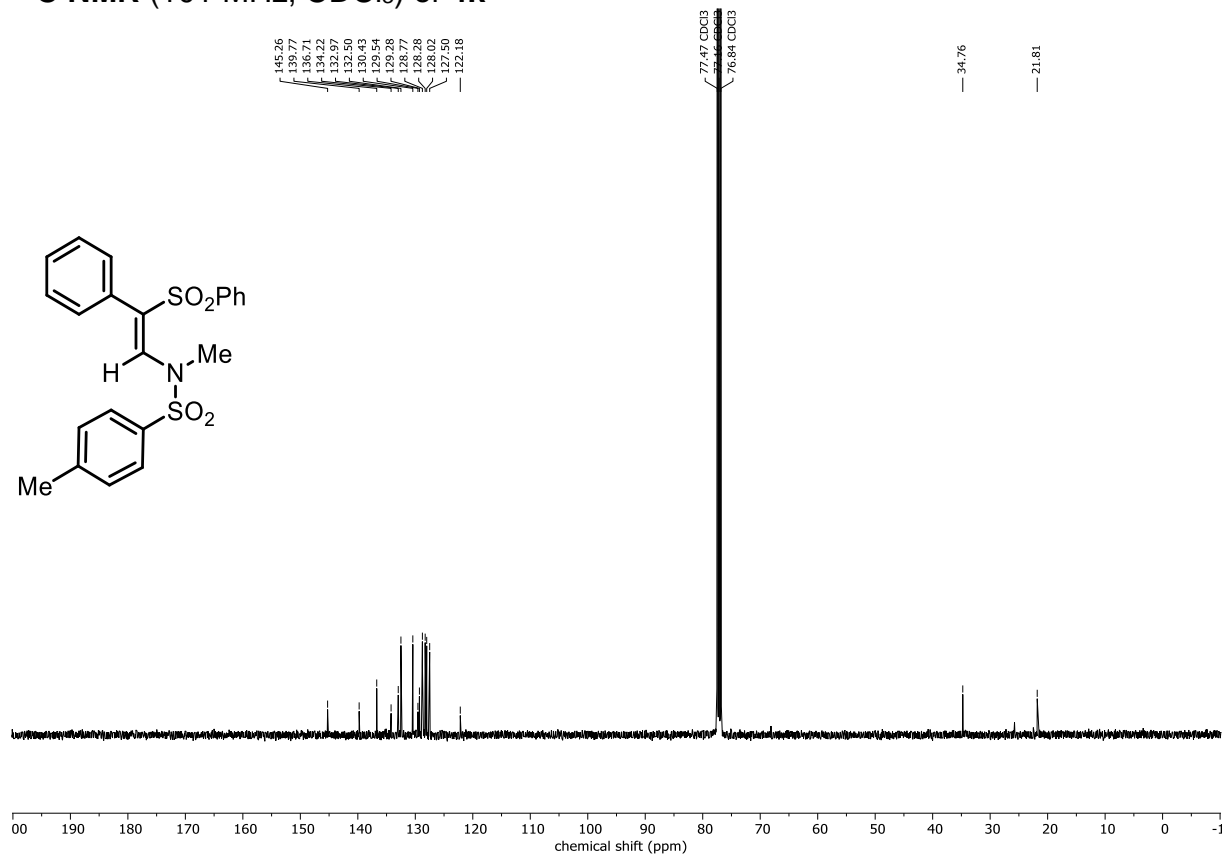

### $^1\text{H}$ NMR (400 MHz, $\text{CD}_3\text{CN}$ ) of **5a**

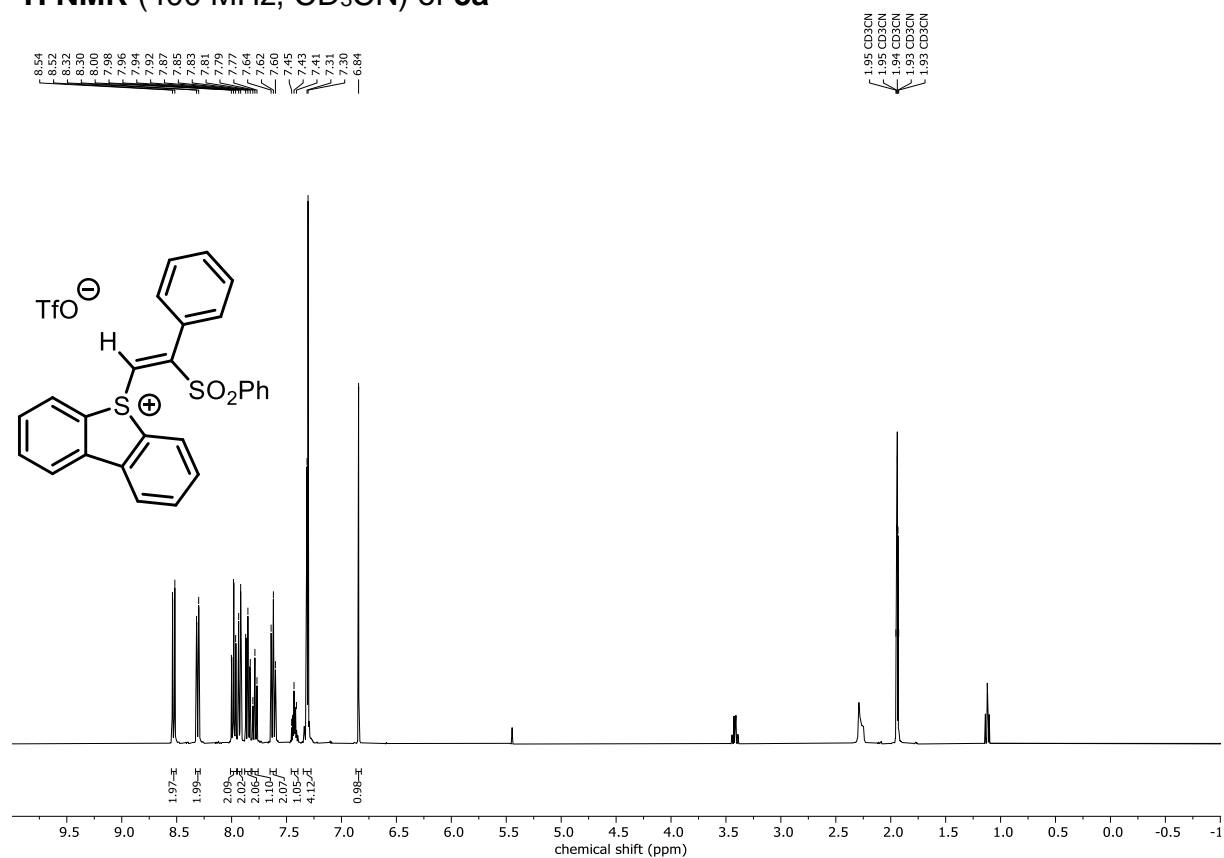

### $^{13}\text{C}$ NMR (101 MHz, $\text{CD}_3\text{CN}$ ) of **5a**

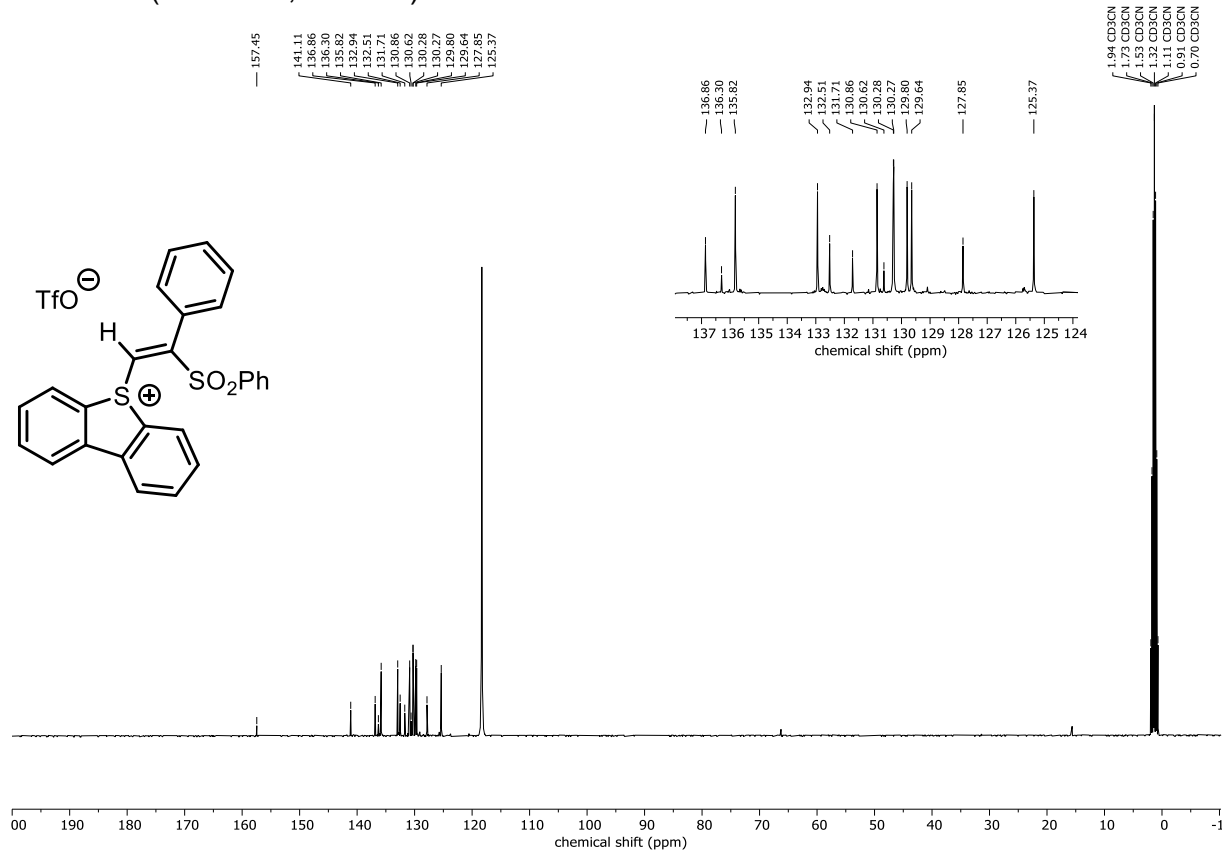

# <sup>1</sup>H NMR (400 MHz, CDCl<sub>3</sub>) of 6

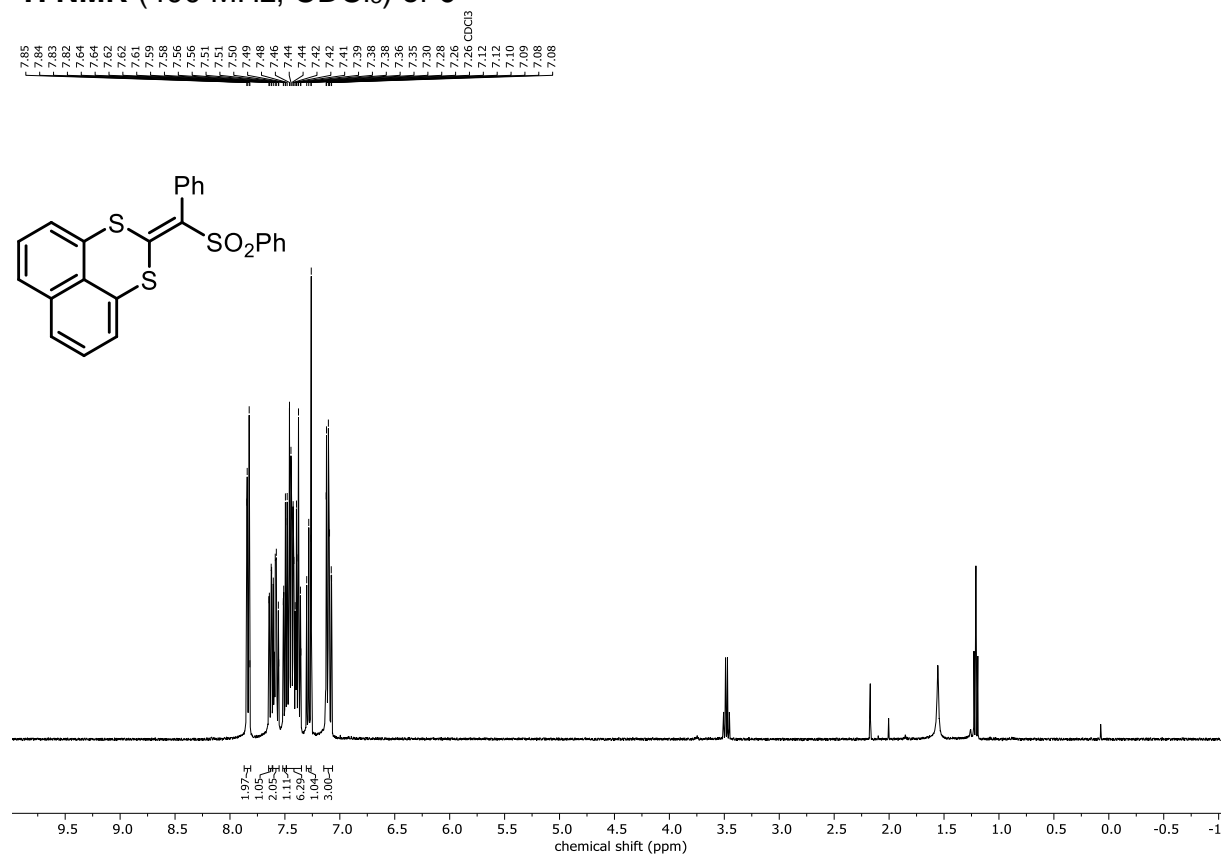

# <sup>13</sup>C NMR (101 MHz, CDCl<sub>3</sub>) of 6

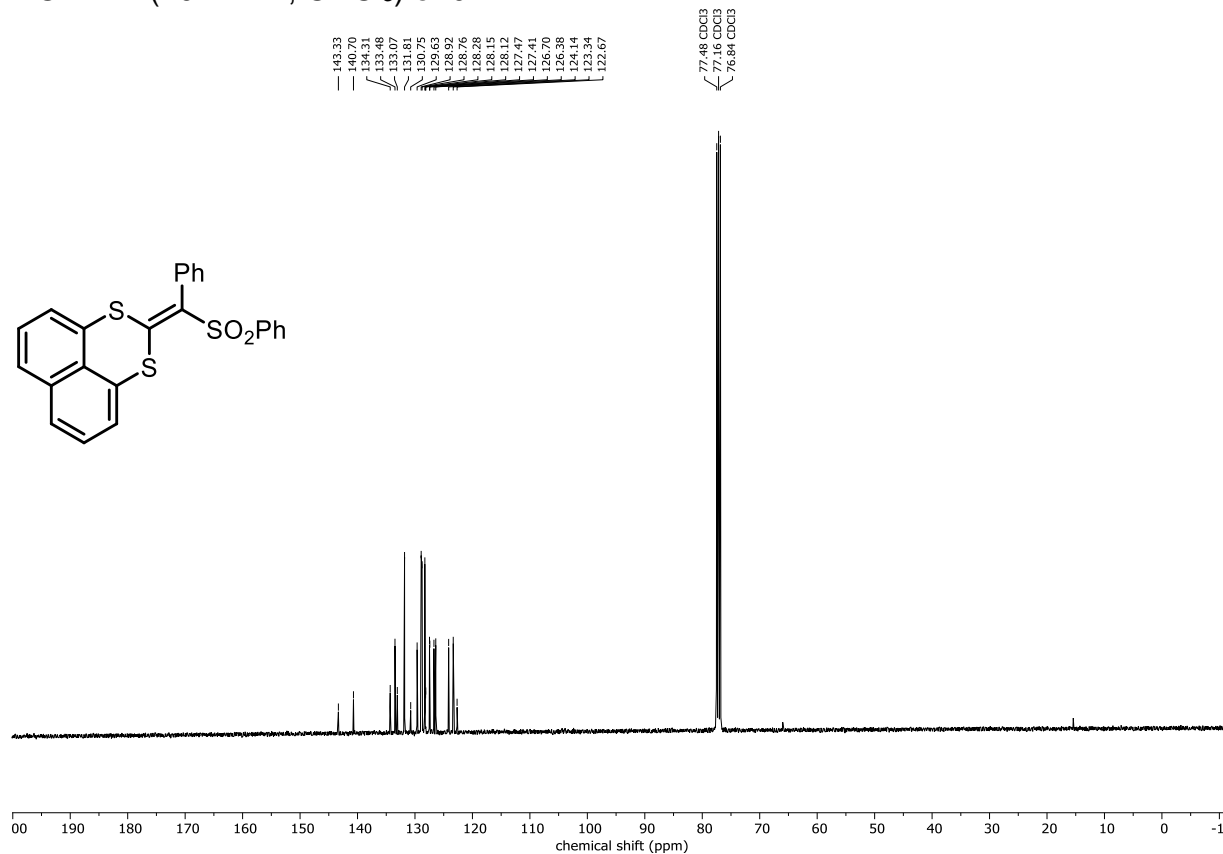

# <sup>1</sup>H NMR (400 MHz, CD<sub>3</sub>CN) of 7

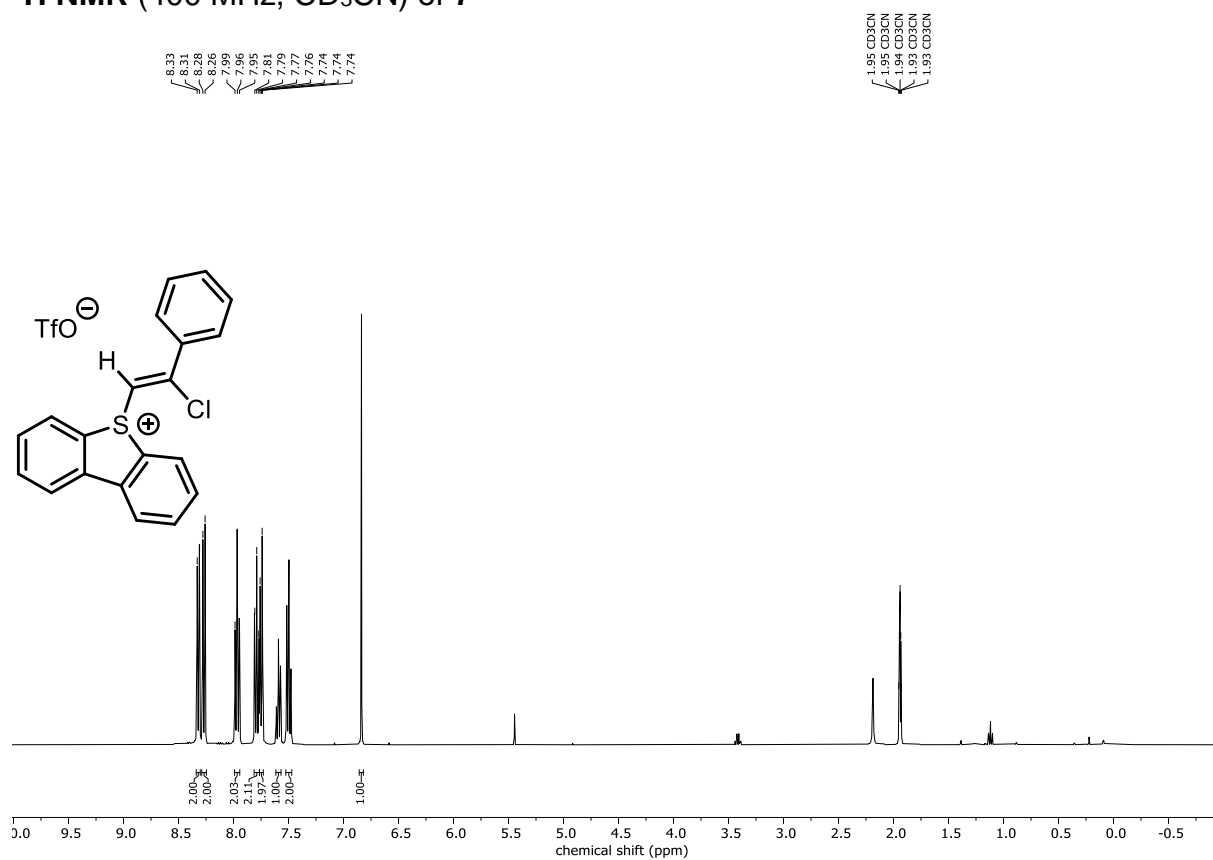

# <sup>13</sup>C NMR (101 MHz, CD<sub>3</sub>CN) of 7

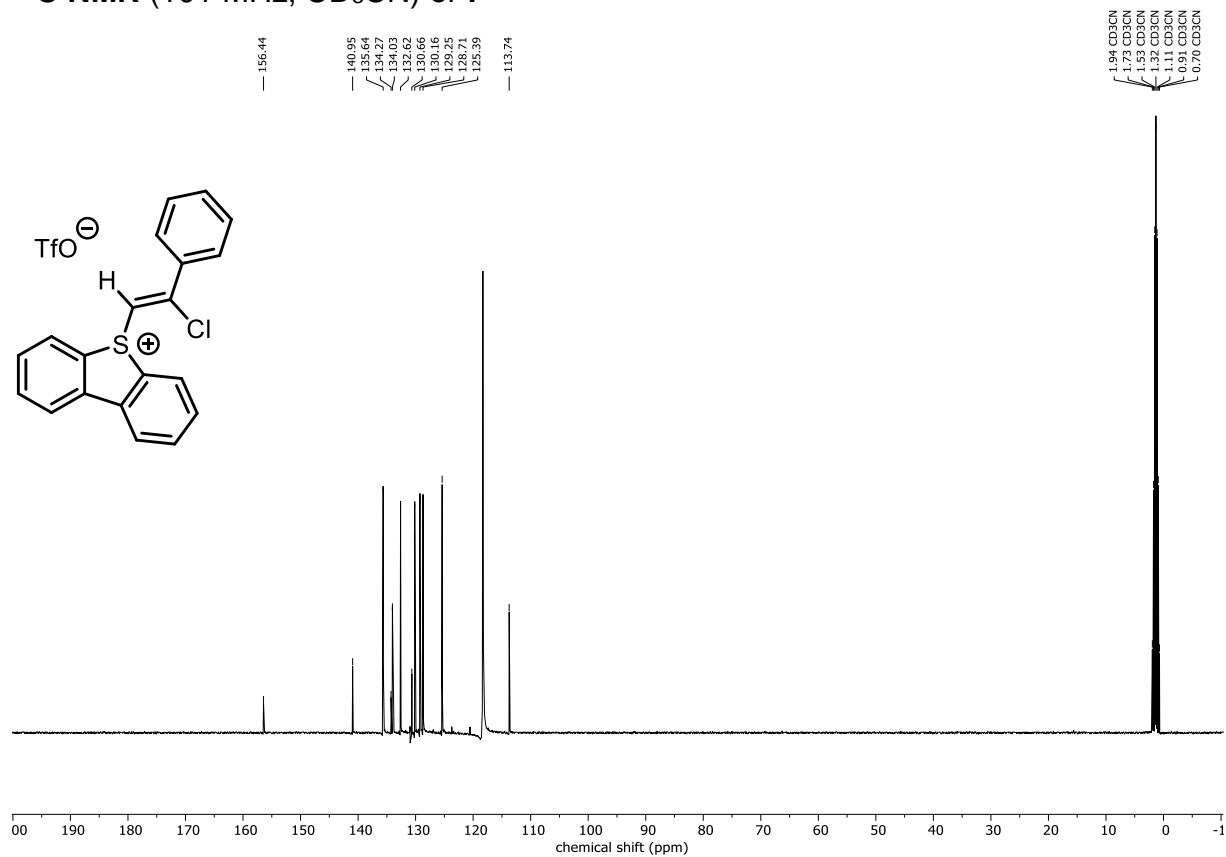

# <sup>1</sup>H NMR (400 MHz, CD<sub>3</sub>CN) of 8

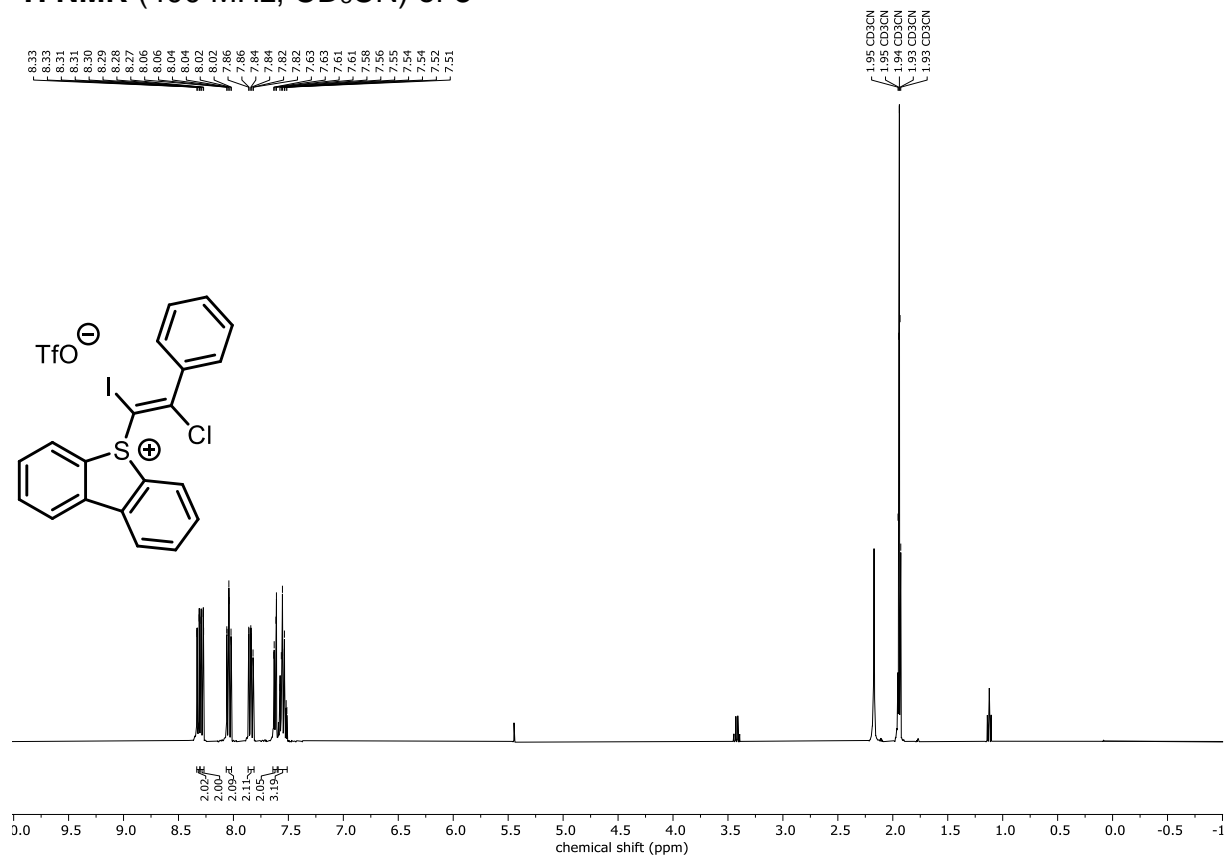

# <sup>13</sup>C NMR (101 MHz, CD<sub>3</sub>CN) of 8

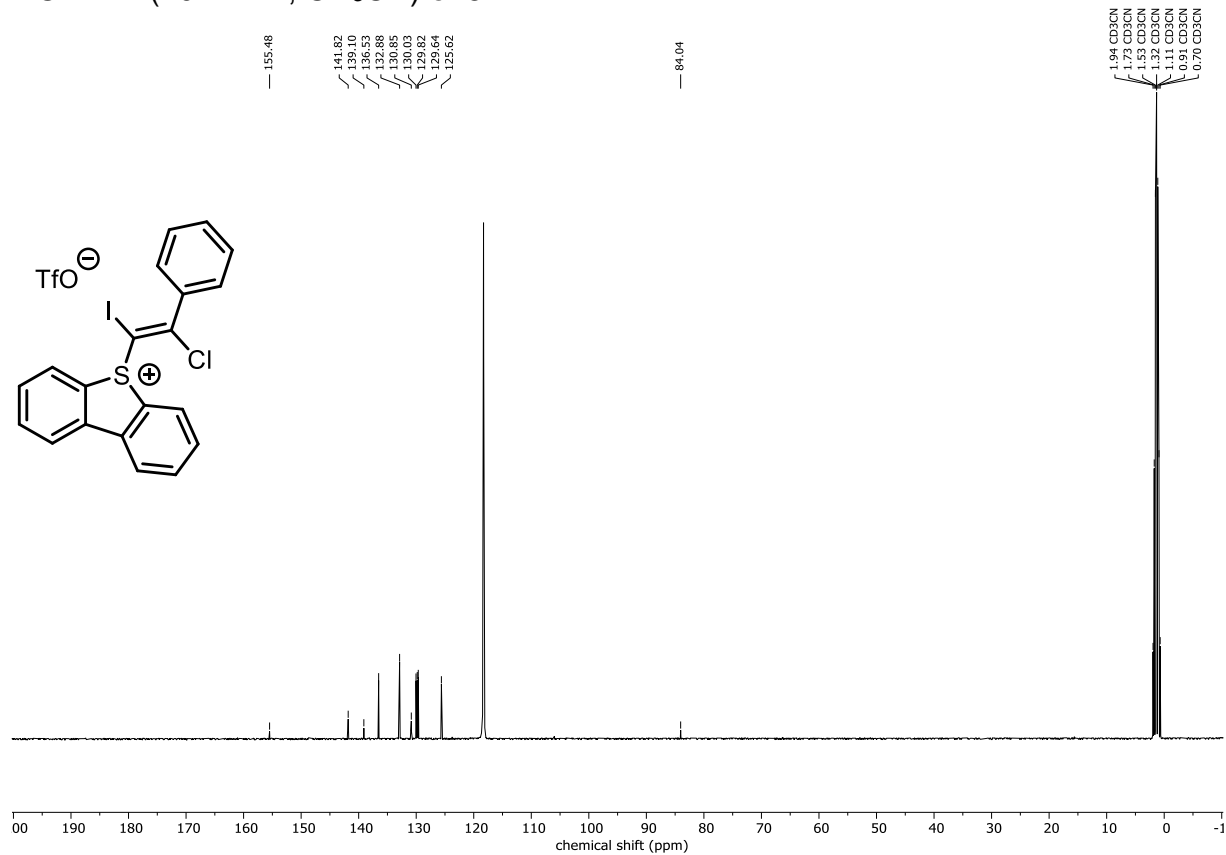

# <sup>1</sup>H NMR (400 MHz, CD<sub>3</sub>CN) of 9

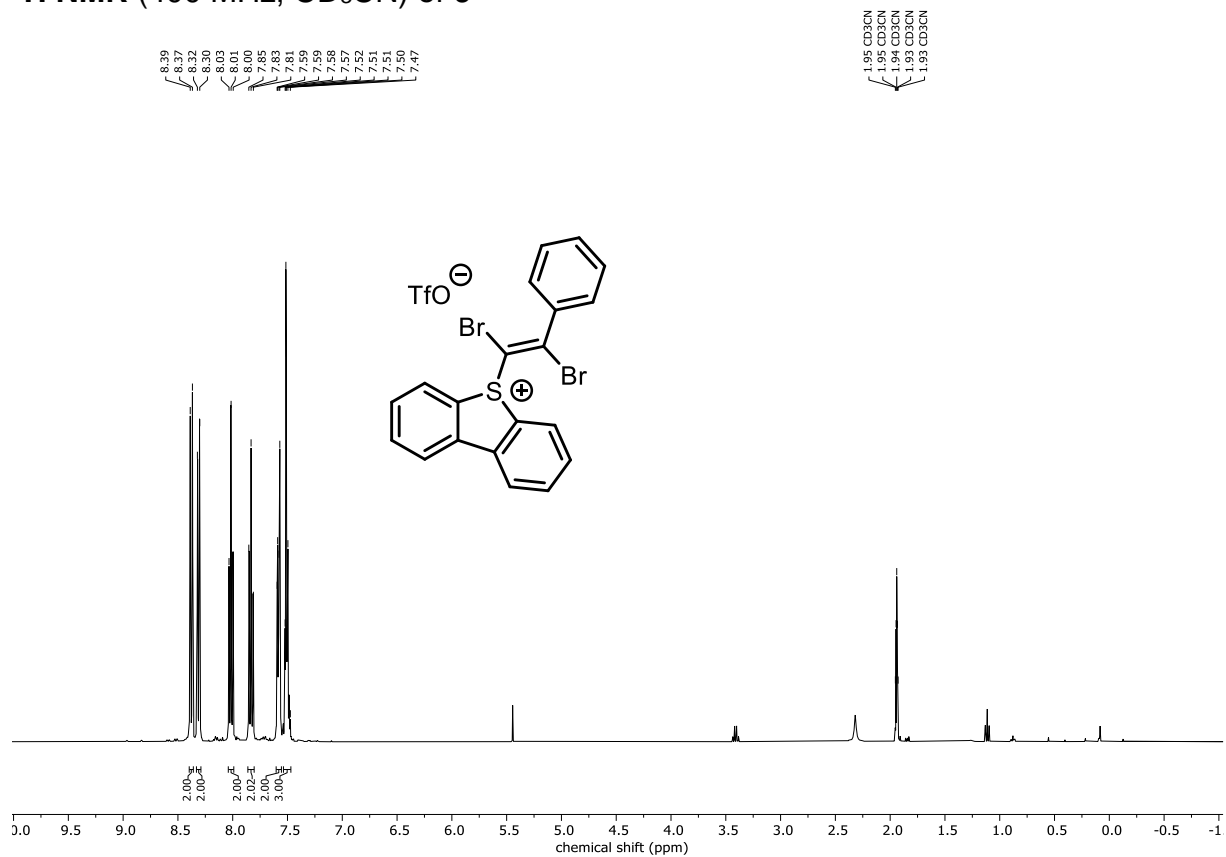

# <sup>13</sup>C NMR (101 MHz, CD<sub>3</sub>CN) of 9

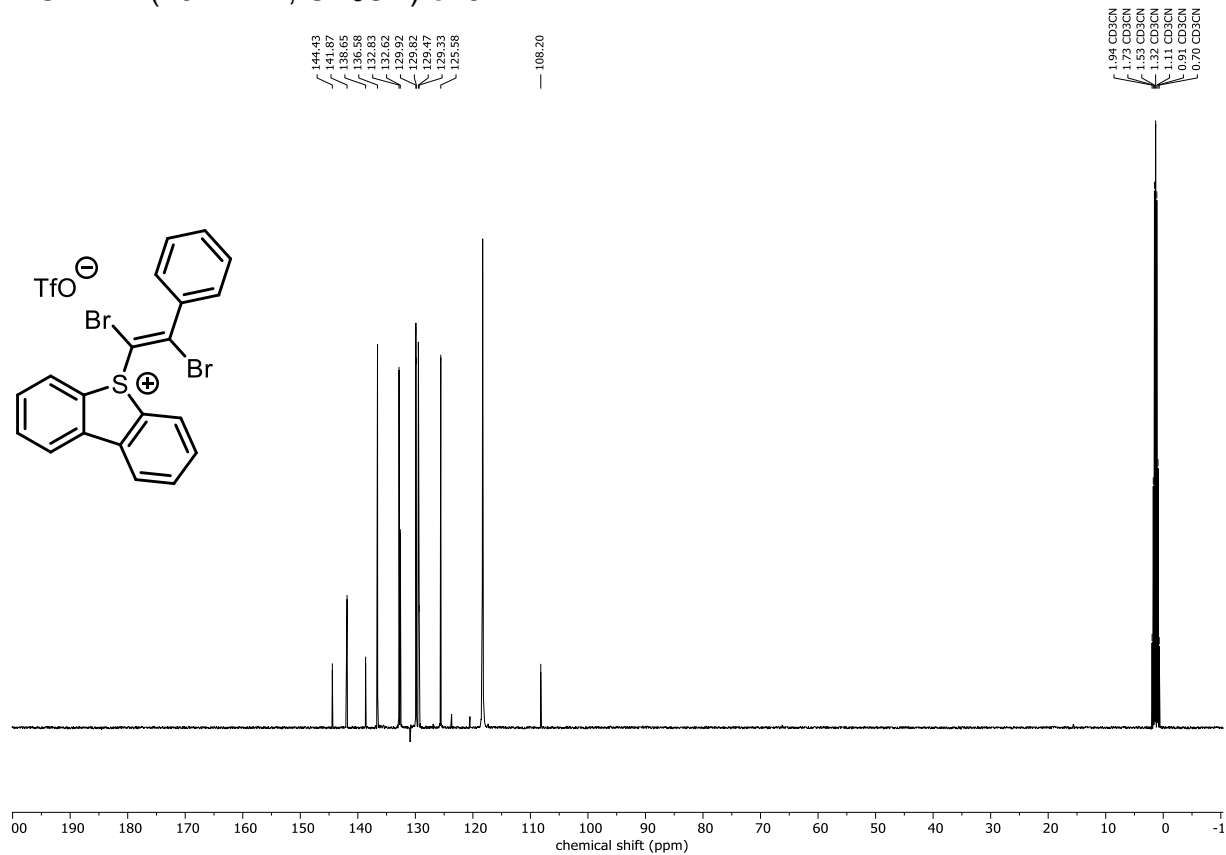

**$^1\text{H}$  NMR [400 MHz,  $(\text{CD}_3)_2\text{CO}$ ] of **10****

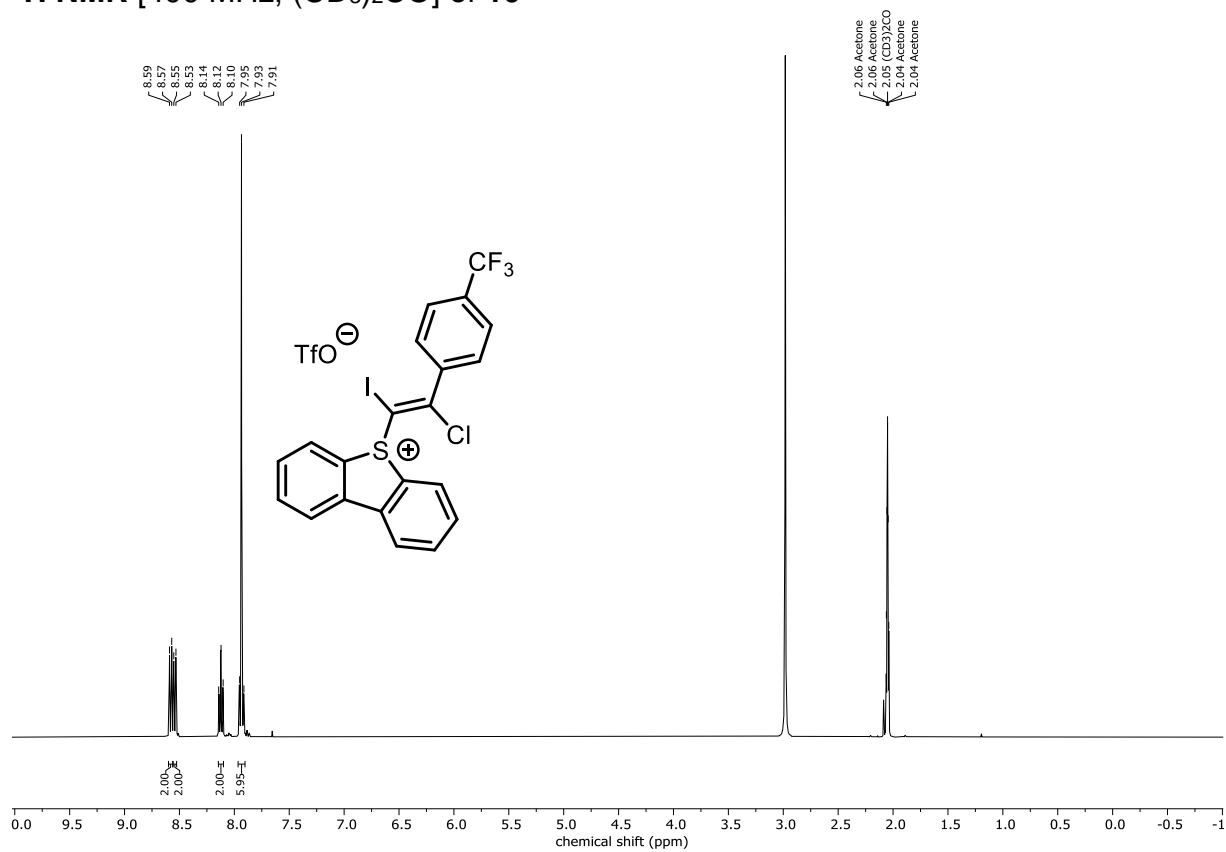

**$^{19}\text{F}$  NMR [377 MHz,  $(\text{CD}_3)_2\text{CO}$ ] of **10****

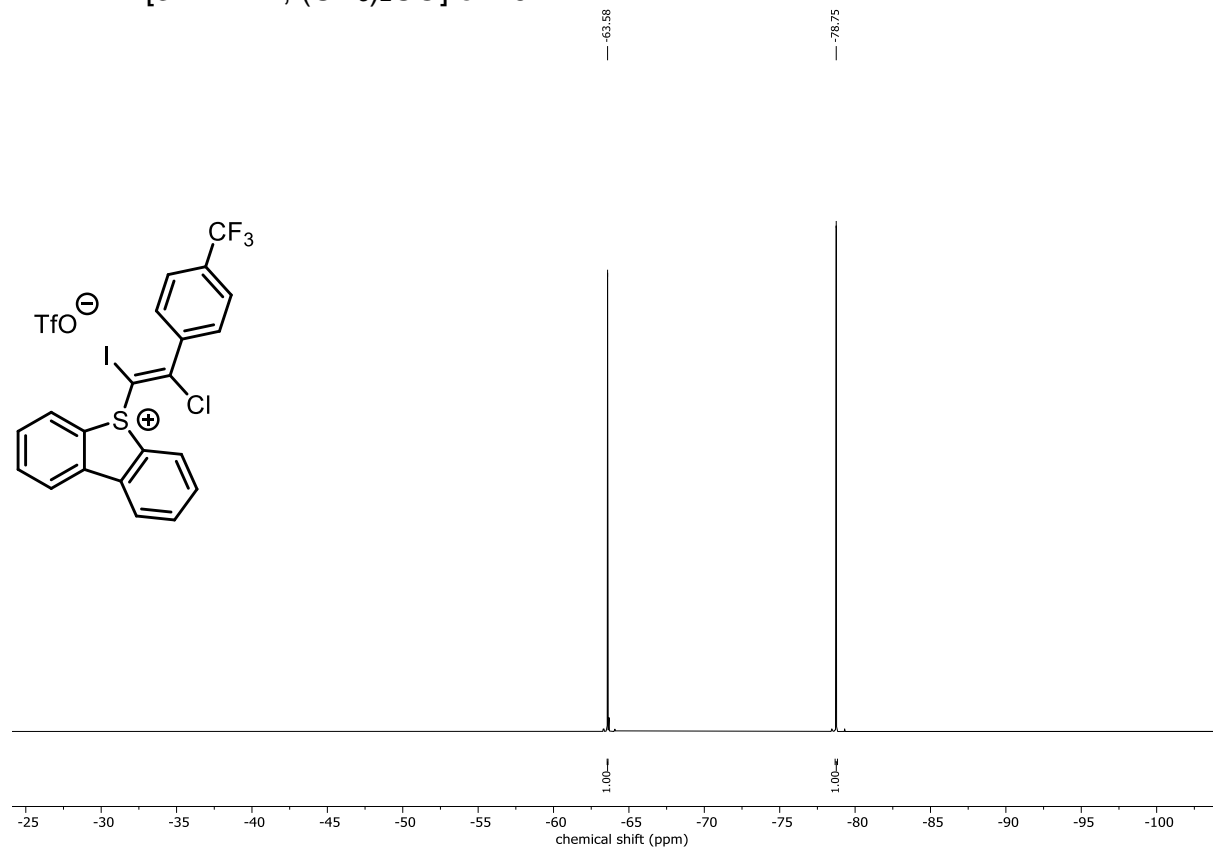



**<sup>13</sup>C NMR [101 MHz, (CD<sub>3</sub>)<sub>2</sub>CO] of 10**

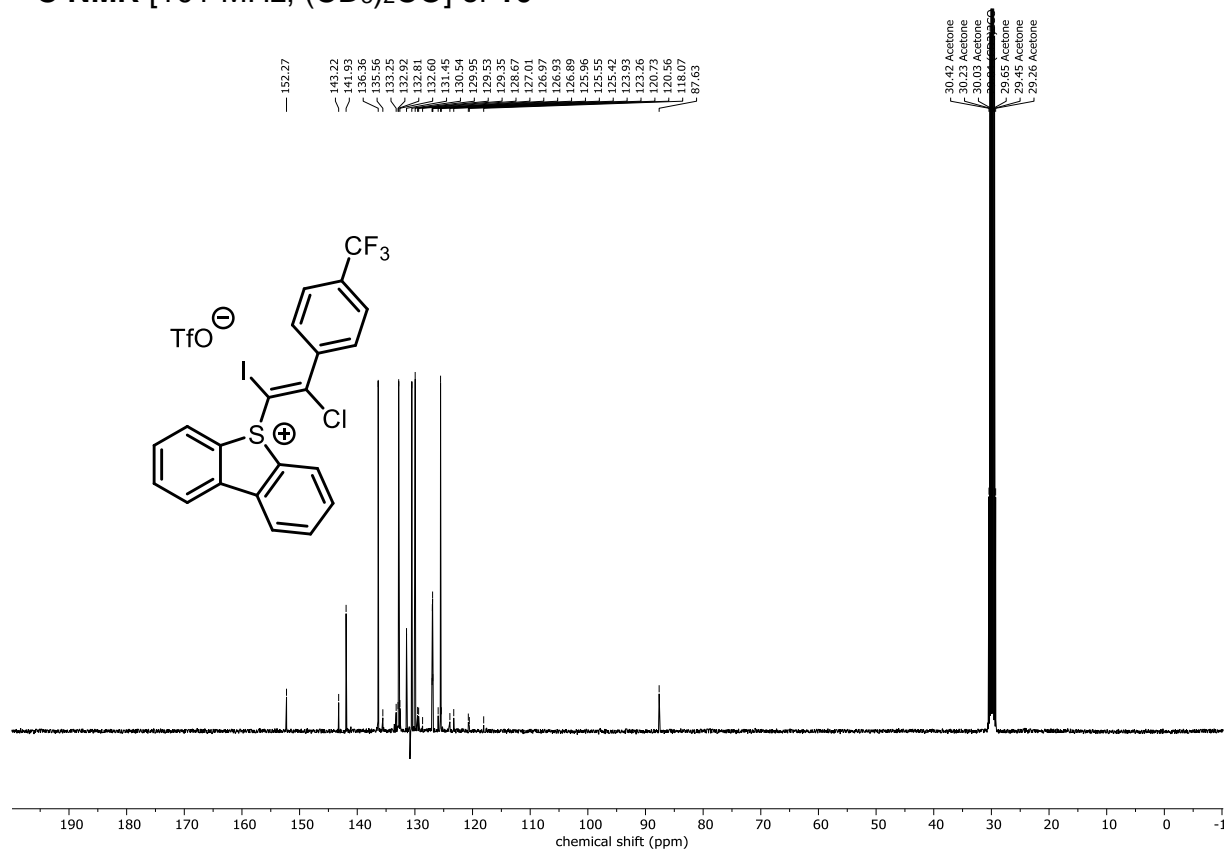

# <sup>1</sup>H NMR (400 MHz, CD<sub>3</sub>CN) of 11

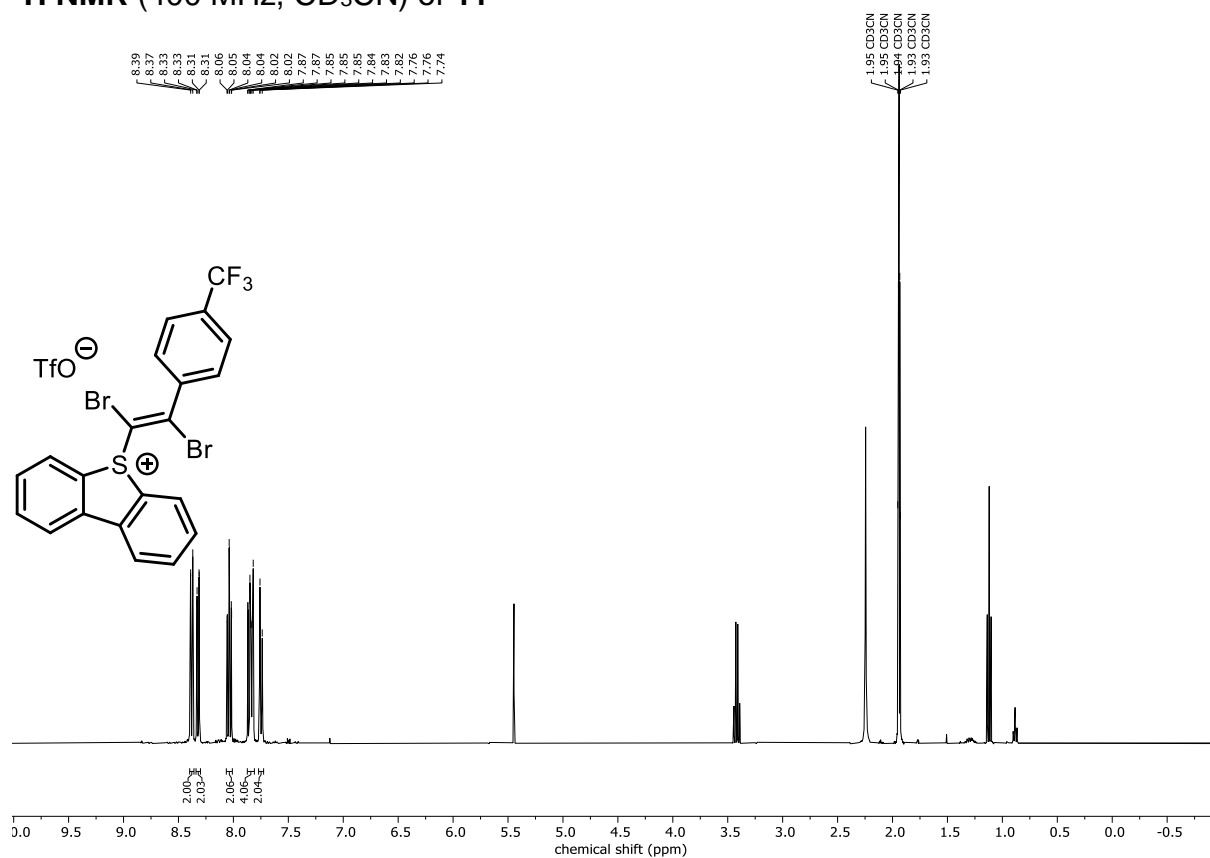

# <sup>19</sup>F NMR (377 MHz, CD<sub>3</sub>CN) of 11

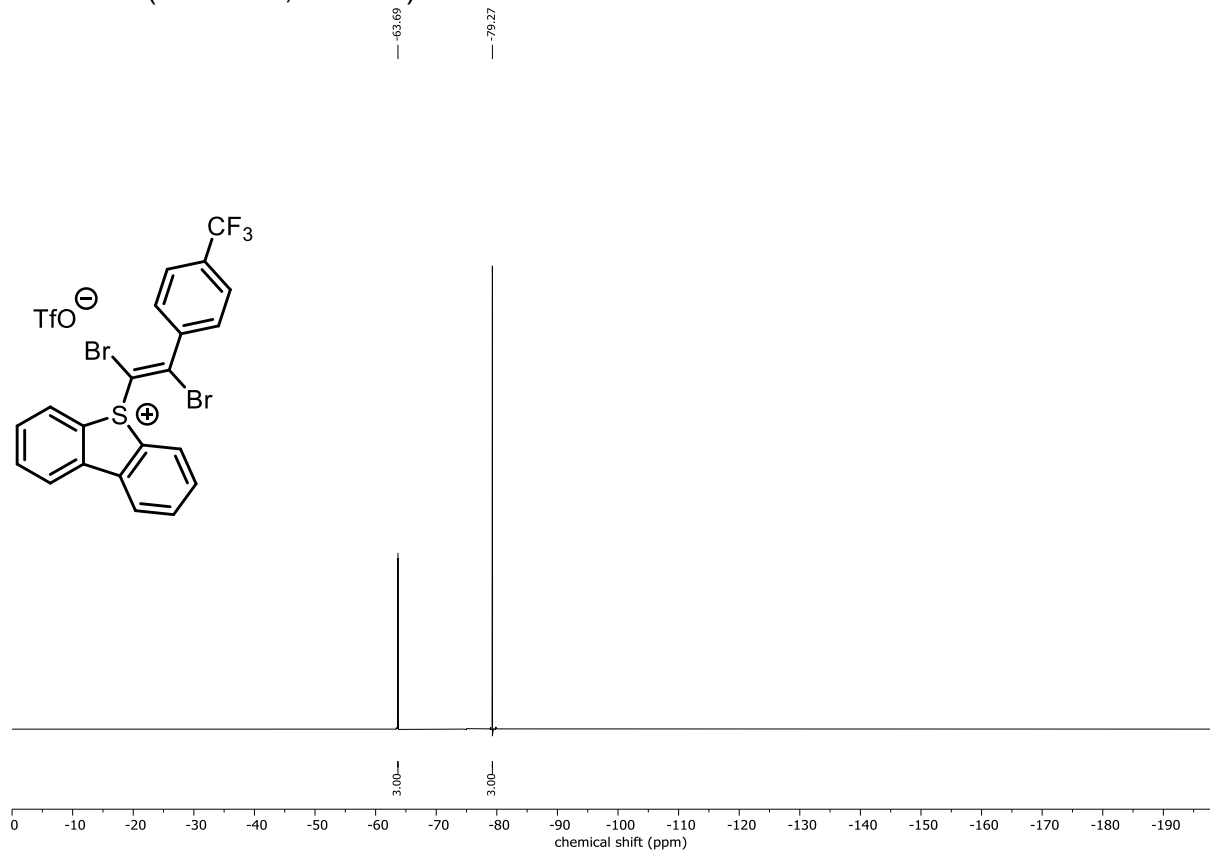

**<sup>13</sup>C NMR (101 MHz, CD<sub>3</sub>CN) of 11**

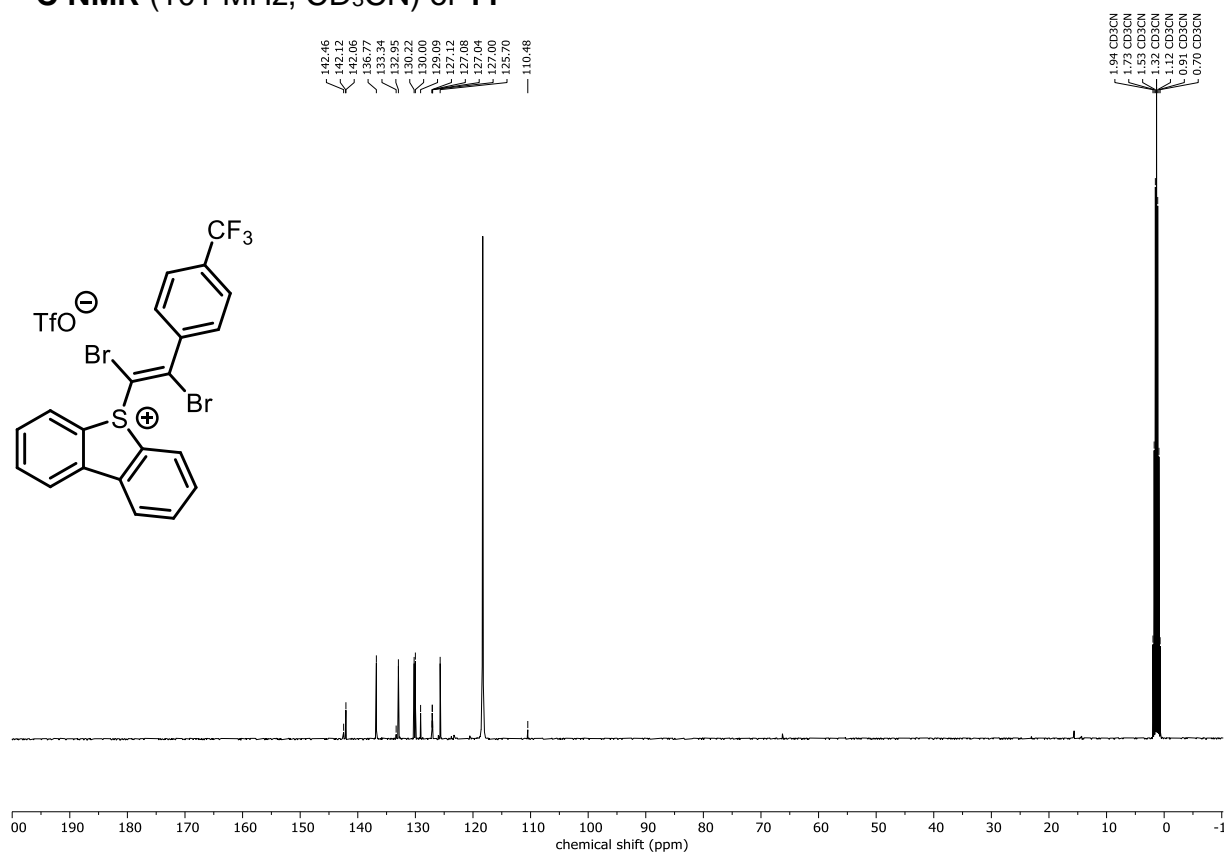

# <sup>1</sup>H NMR (400 MHz, CD<sub>3</sub>CN) of 12

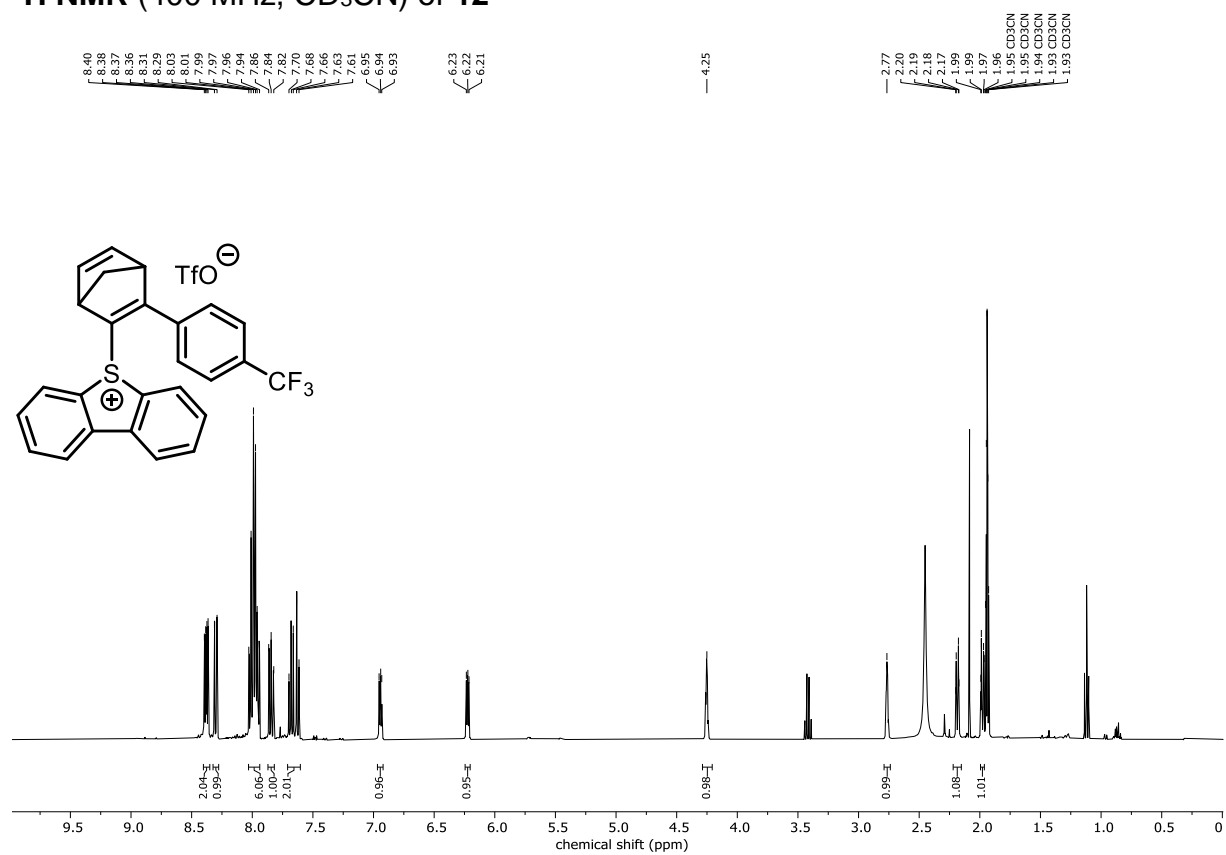

# <sup>19</sup>F NMR (377 MHz, CD<sub>3</sub>CN) of 12

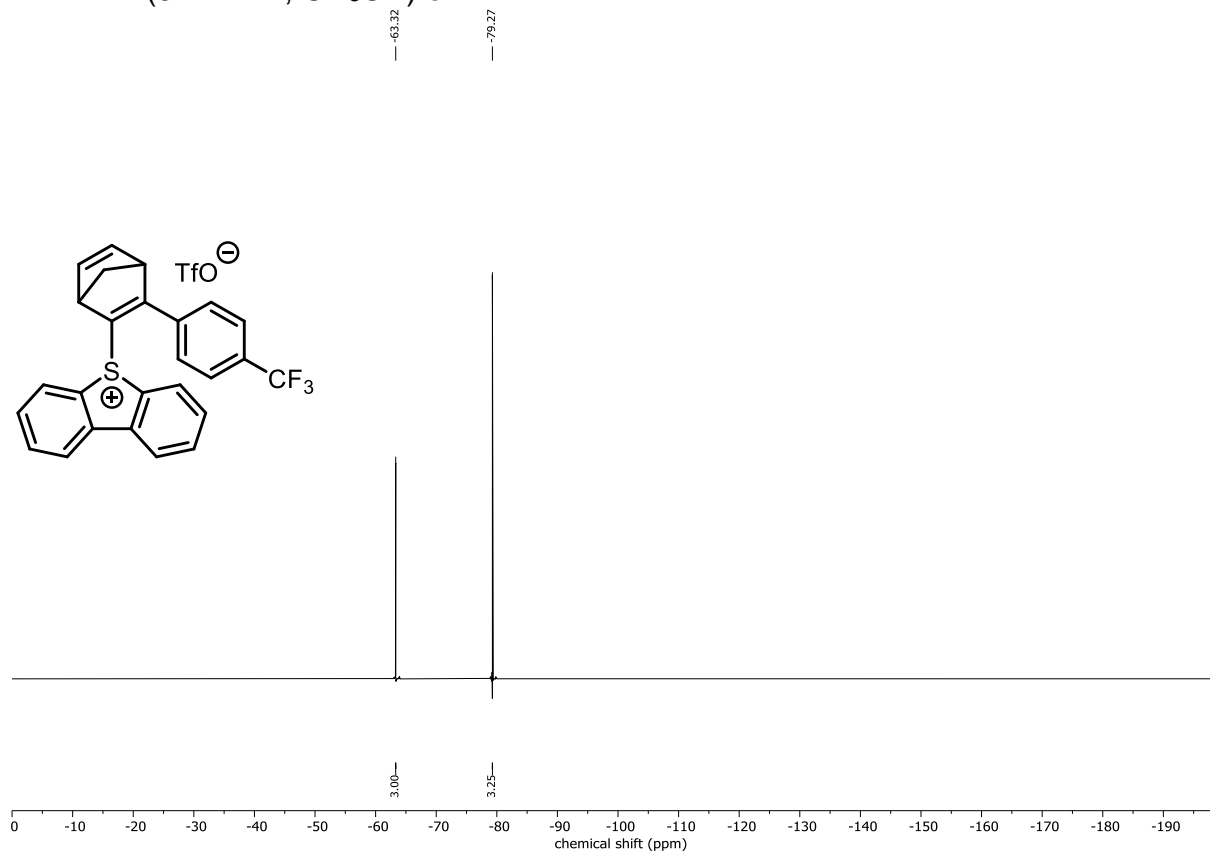

**<sup>13</sup>C NMR (101 MHz, CD<sub>3</sub>CN) of 12**

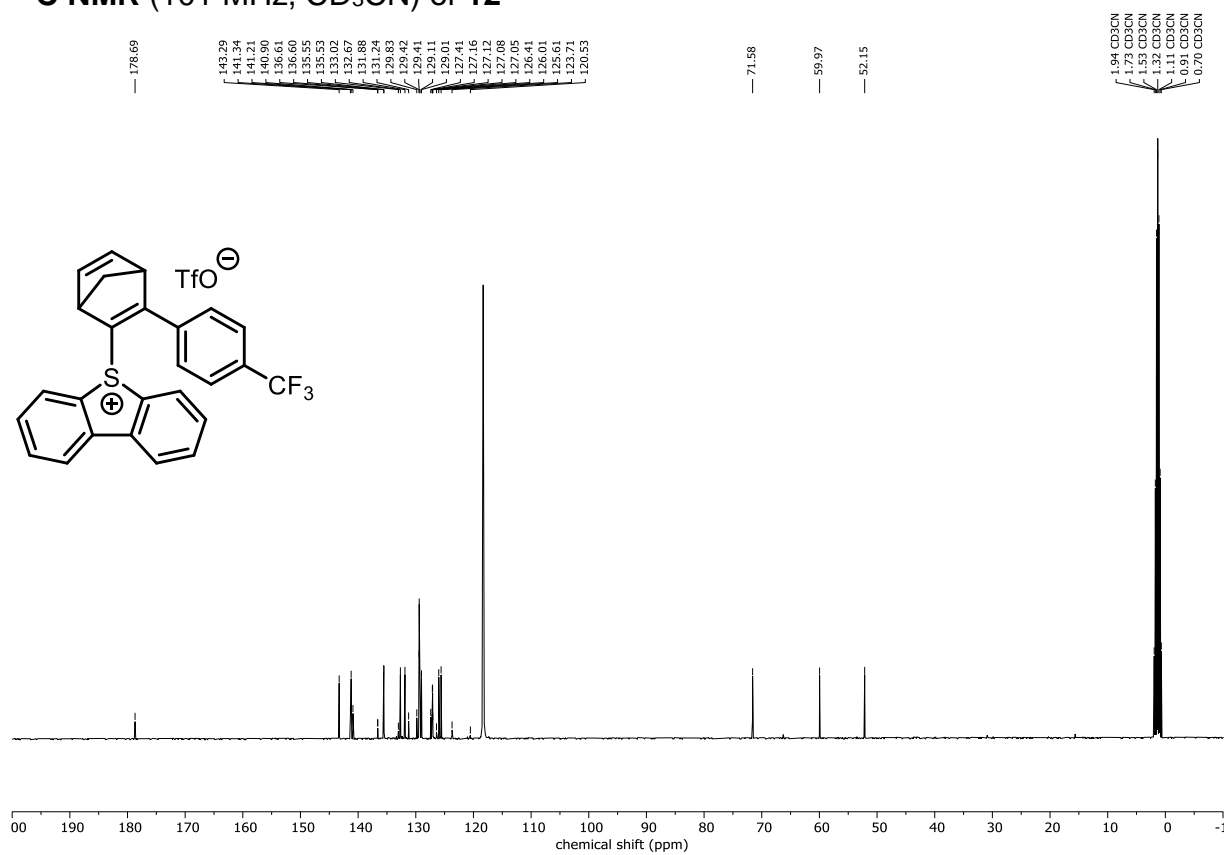



# <sup>1</sup>H NMR (400 MHz, CDCl<sub>3</sub>) of 14

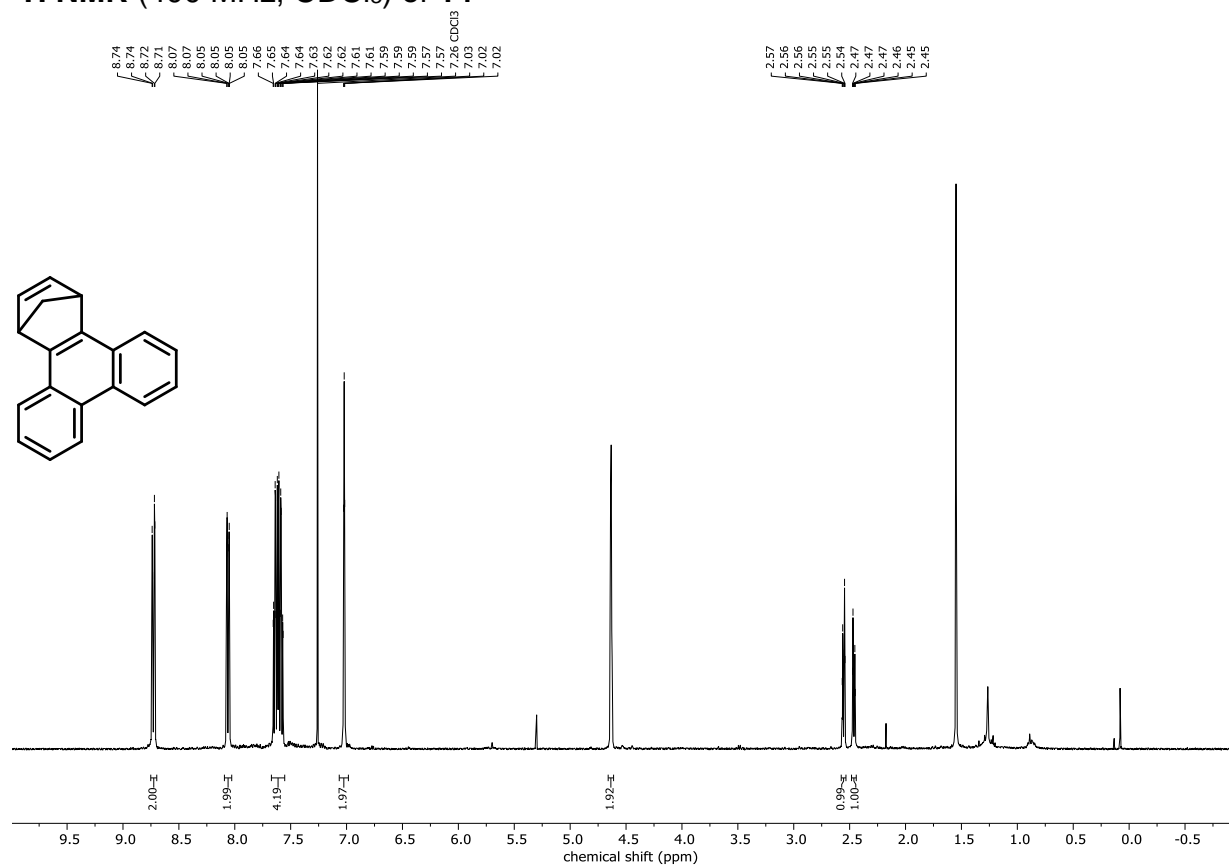

# <sup>13</sup>C NMR (101 MHz, CDCl<sub>3</sub>) of 14

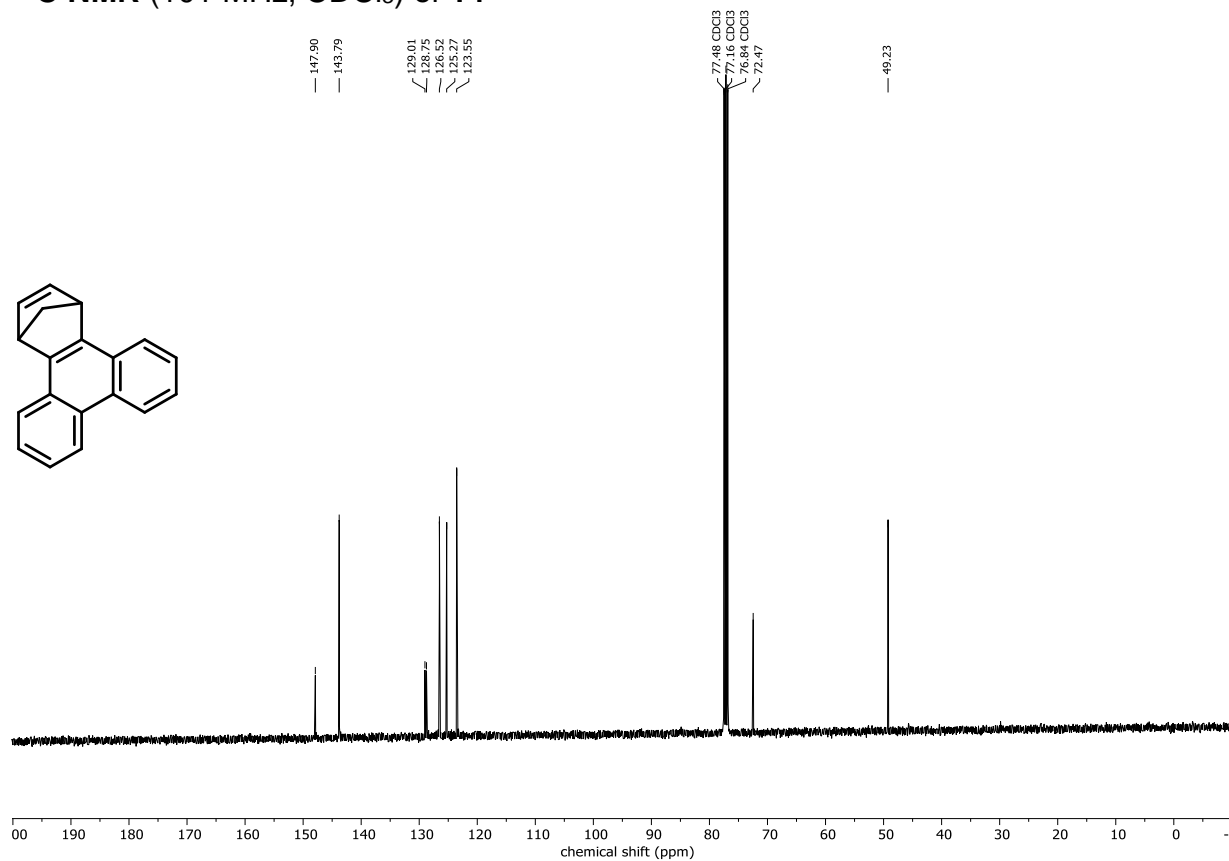

# <sup>1</sup>H NMR (400 MHz, CD<sub>3</sub>CN) of 15

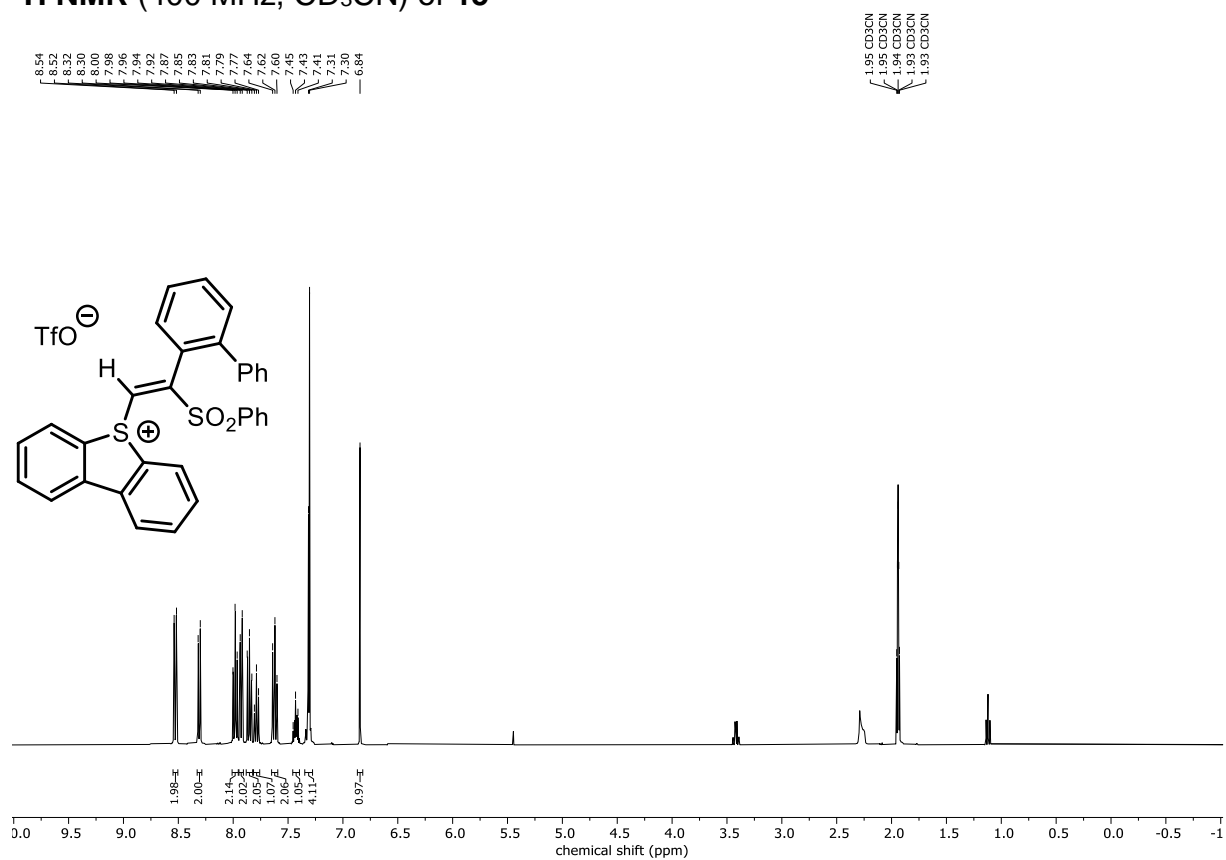

# <sup>13</sup>C NMR (101 MHz, CD<sub>3</sub>CN) of 15

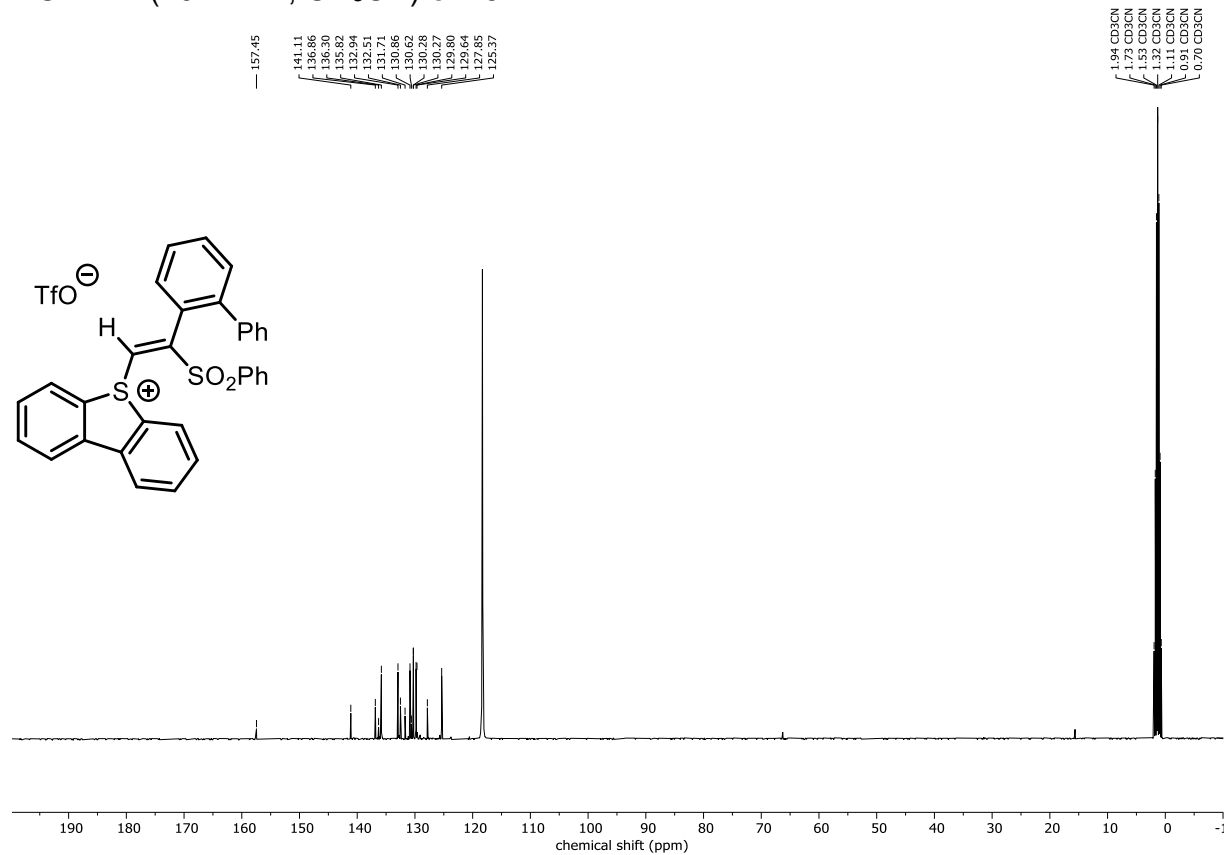



# <sup>1</sup>H NMR (400 MHz, CDCl<sub>3</sub>) of 16

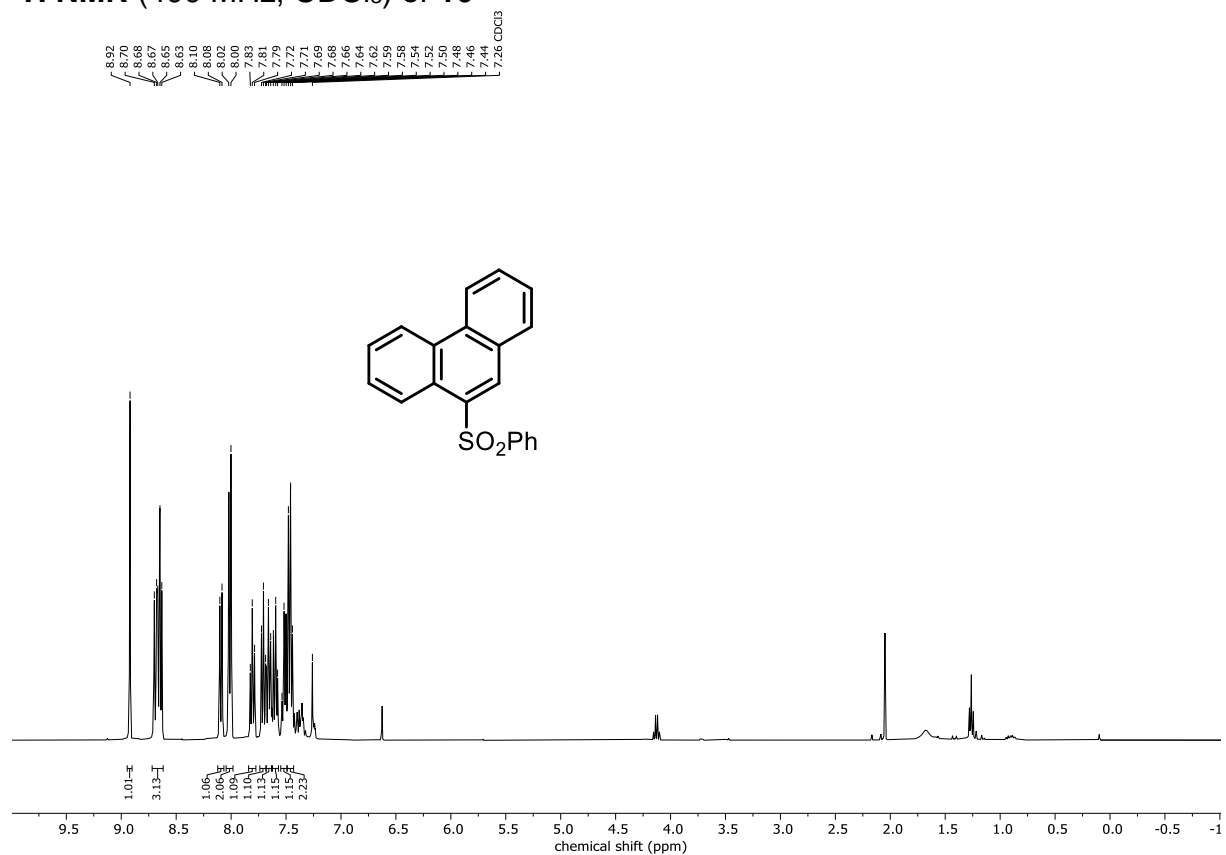

# <sup>13</sup>C NMR (101 MHz, CDCl<sub>3</sub>) of 16

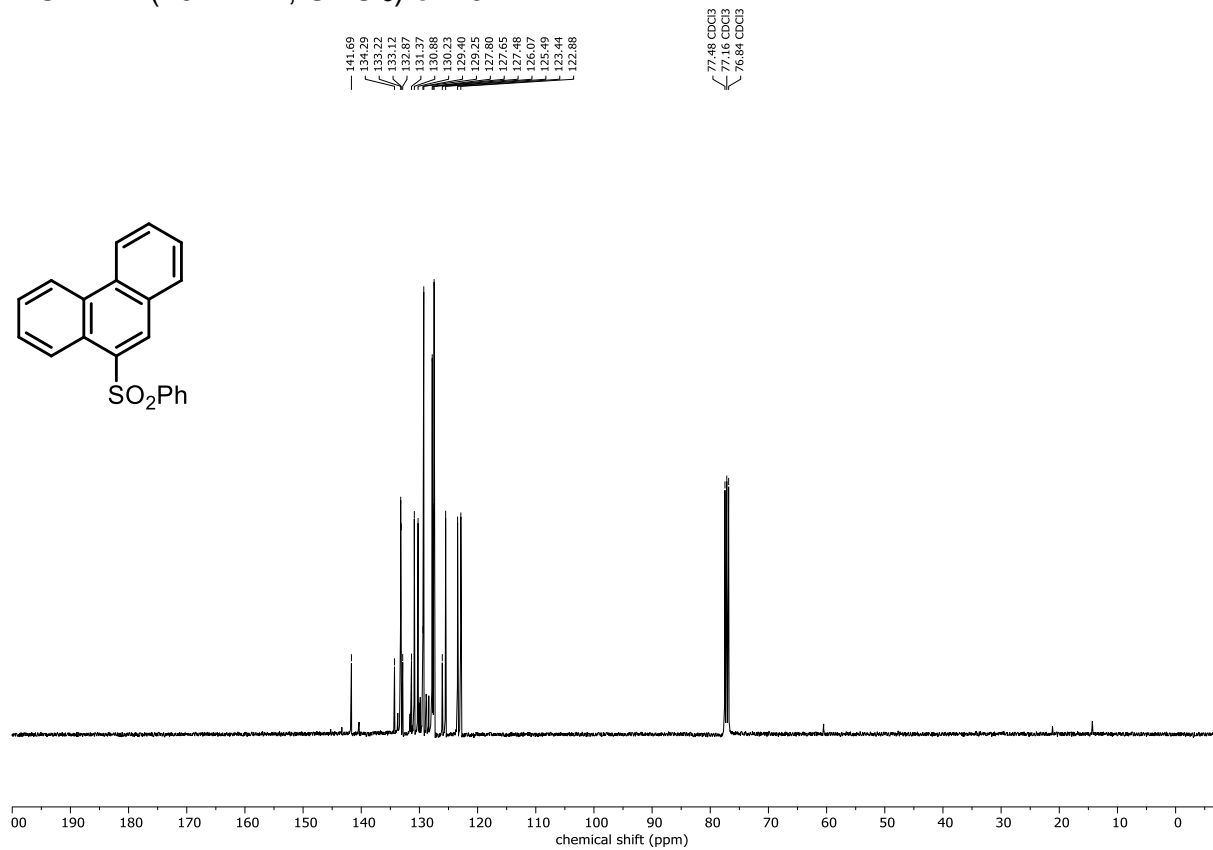

# <sup>1</sup>H NMR (300 MHz, CDCl<sub>3</sub>) of 21

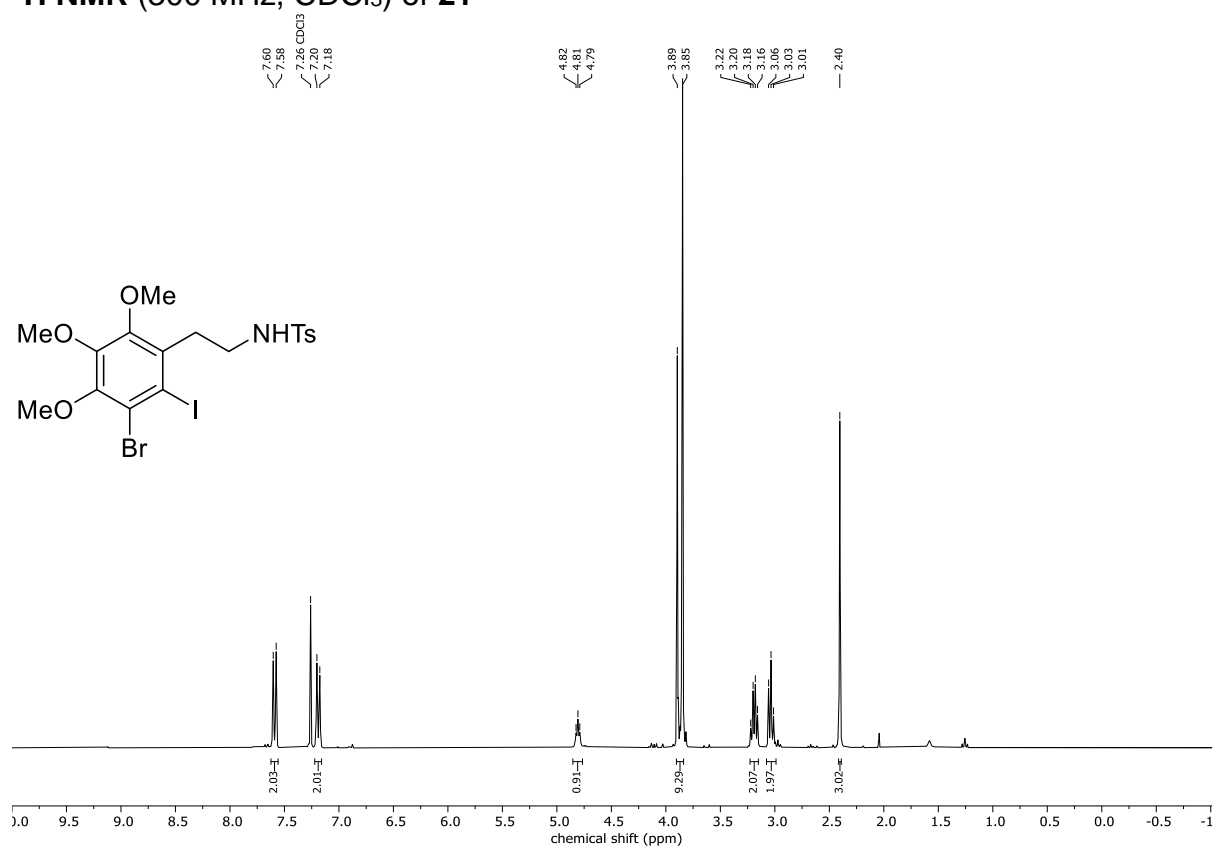

# <sup>13</sup>C NMR (75 MHz, CDCl<sub>3</sub>) of 21

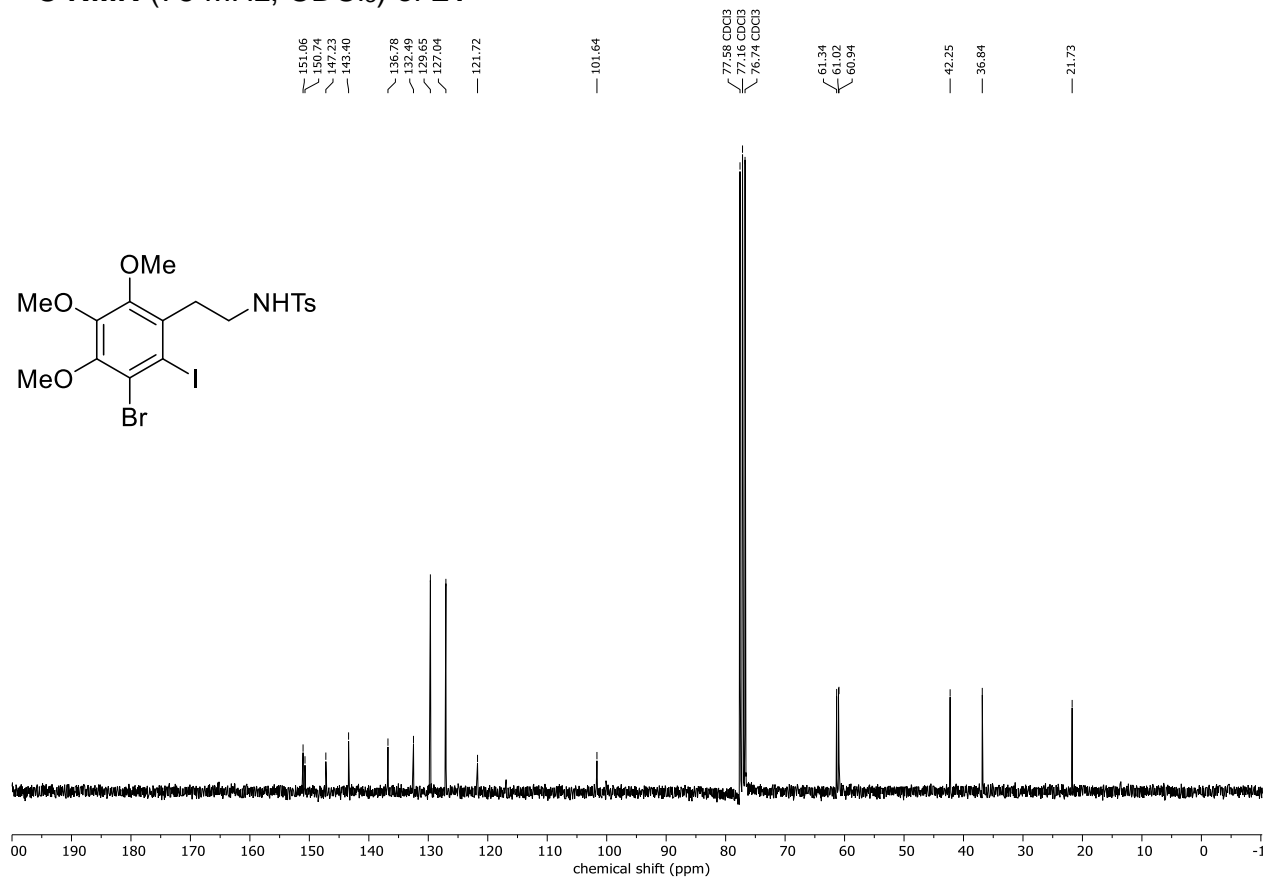

### $^1\text{H}$ NMR (300 MHz, $\text{CDCl}_3$ ) of **22**

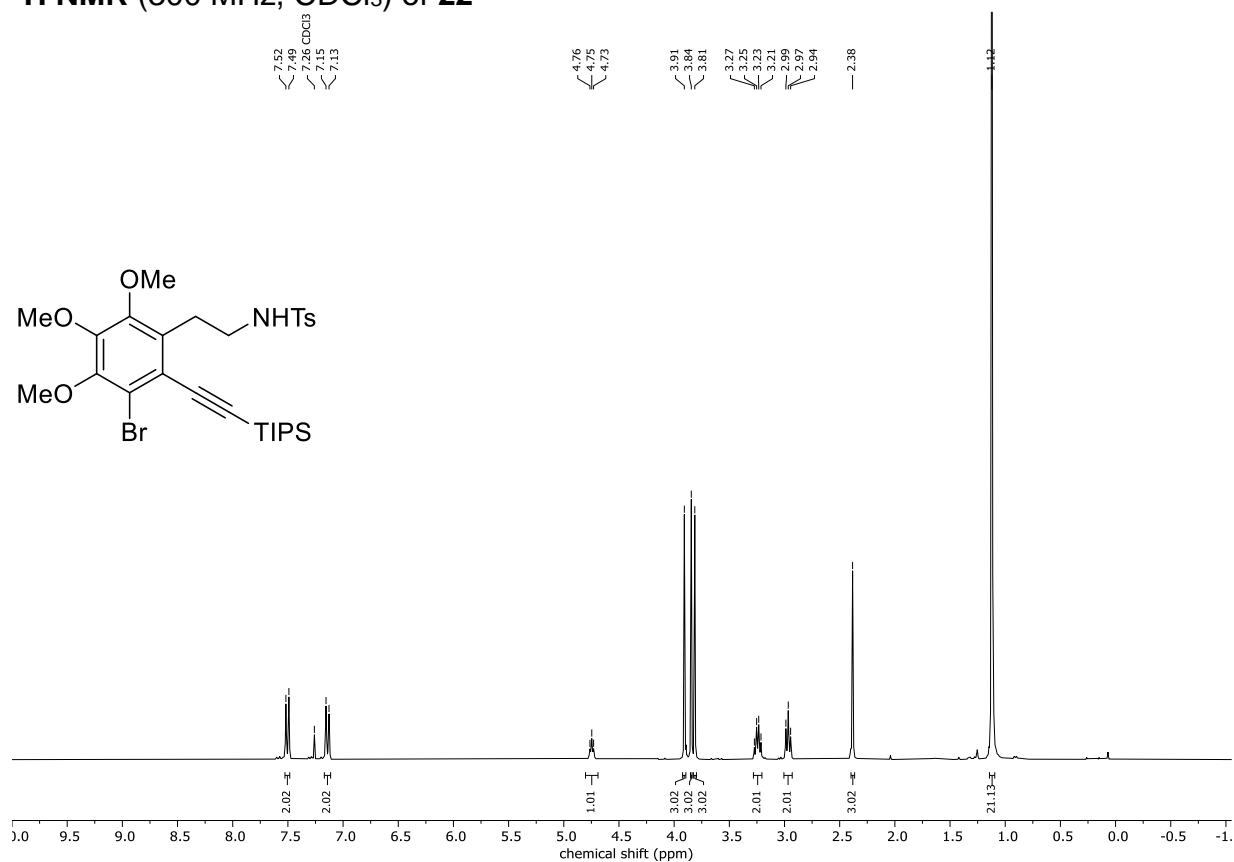

### $^{13}\text{C}$ NMR (75 MHz, $\text{CDCl}_3$ ) of **22**

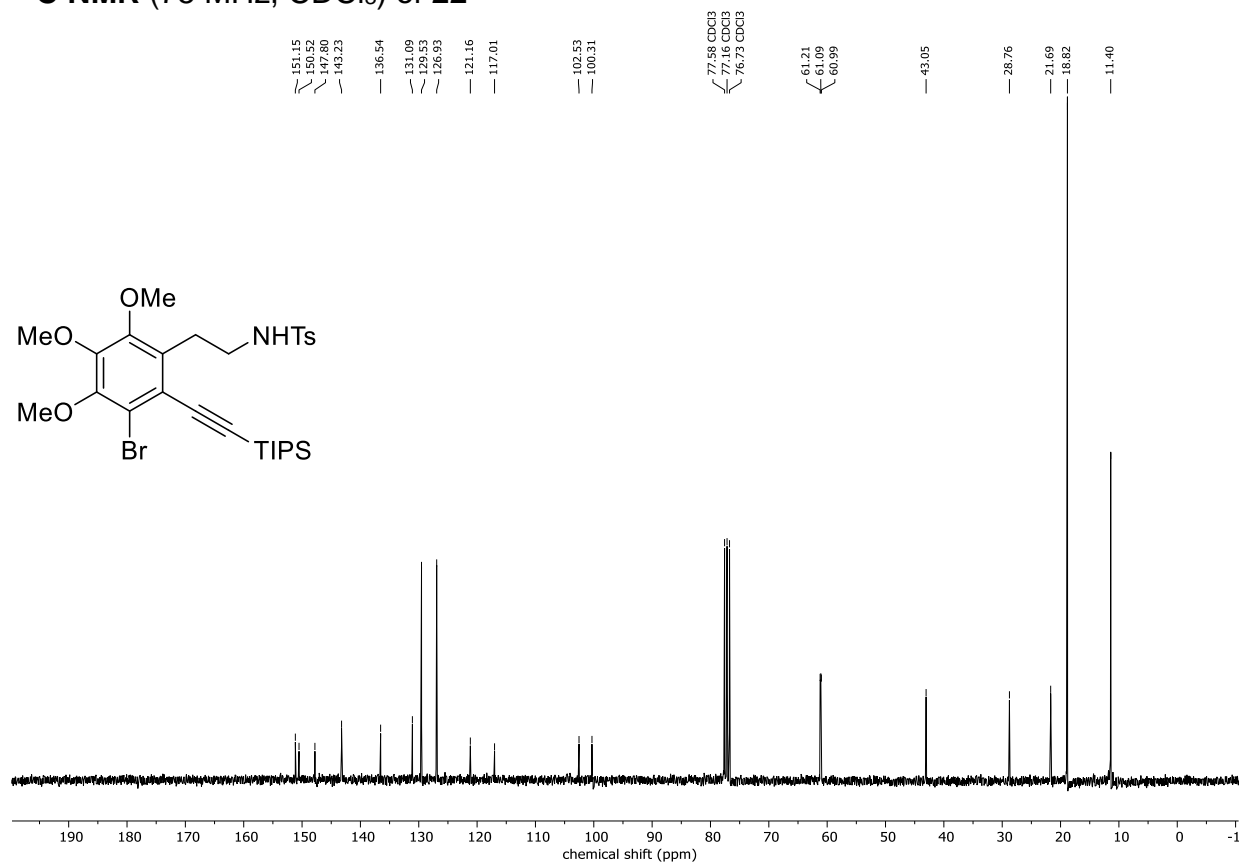

**<sup>1</sup>H NMR (400 MHz, CDCl<sub>3</sub>) of 23**

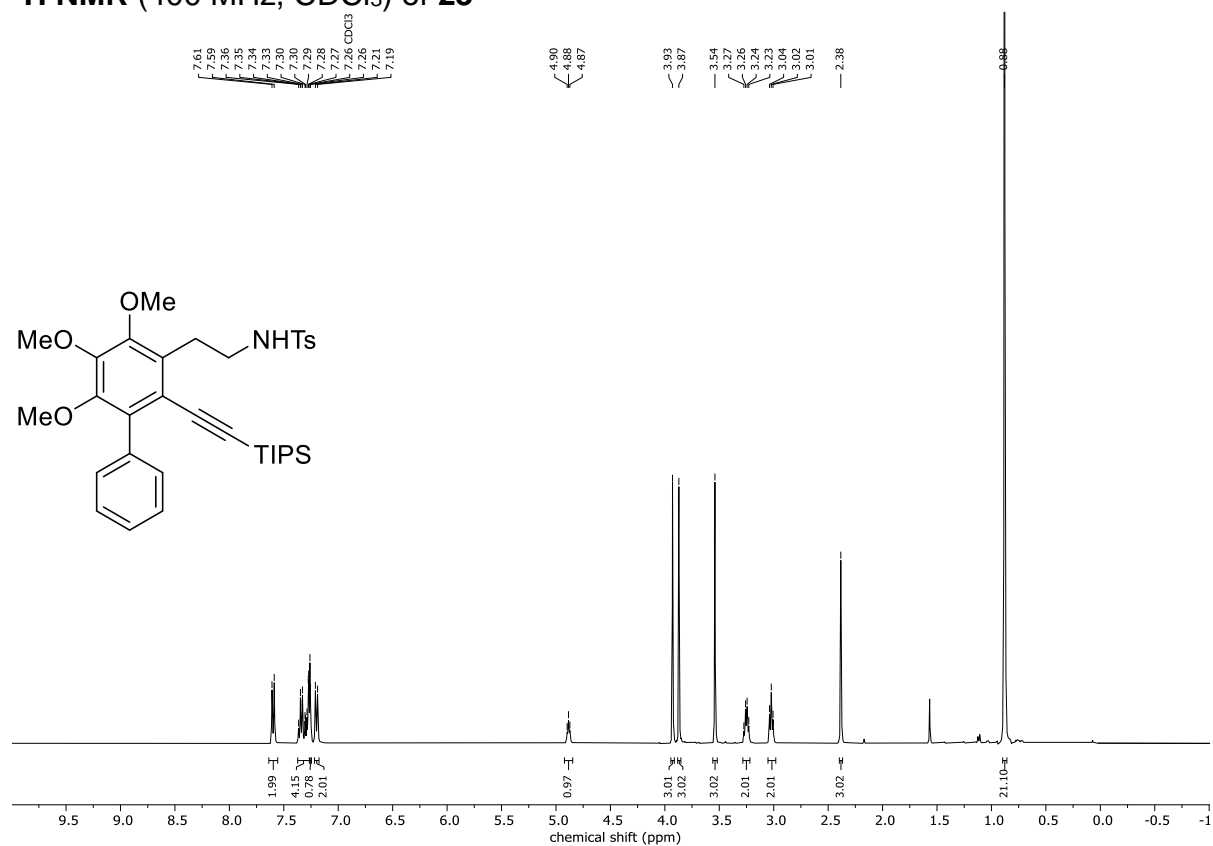

**<sup>13</sup>C NMR (101 MHz, CDCl<sub>3</sub>) of 23**

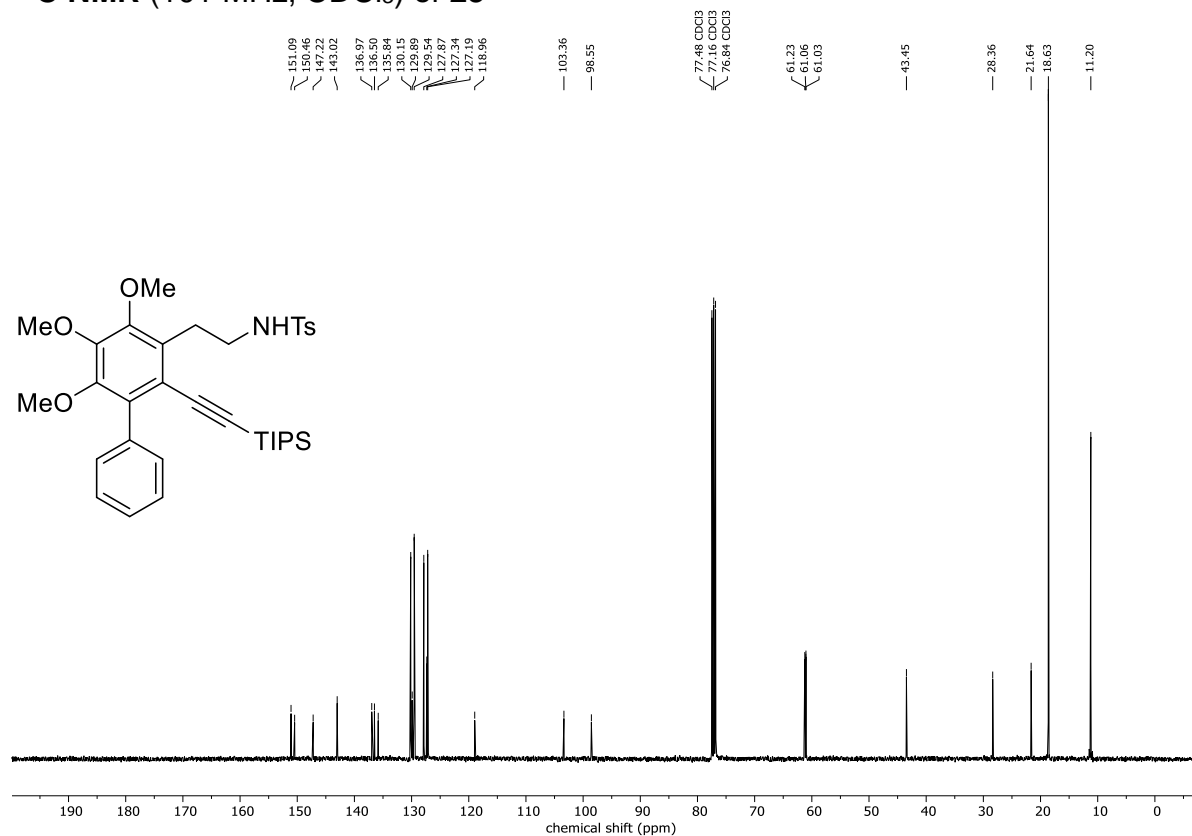

# <sup>1</sup>H NMR (400 MHz, CDCl<sub>3</sub>) of **24**

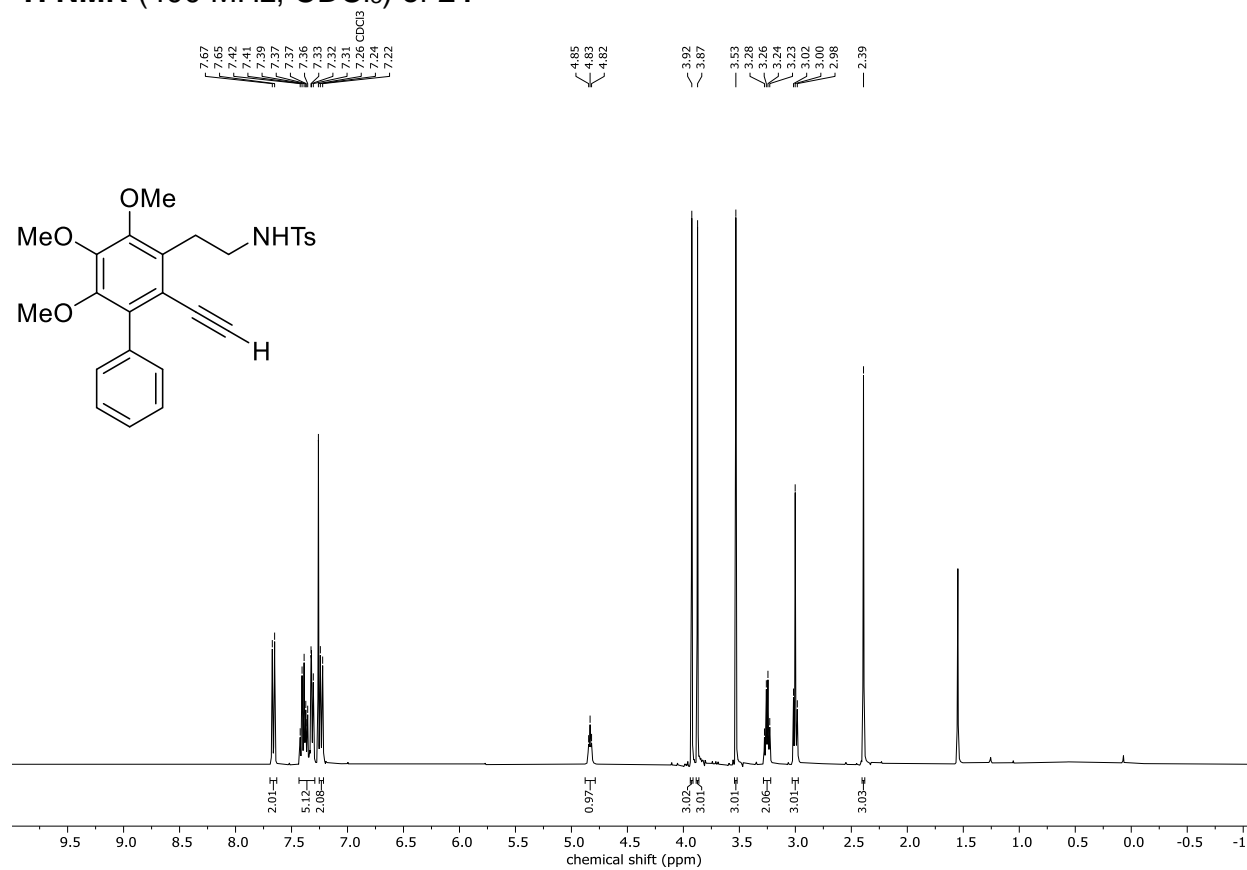

# <sup>13</sup>C NMR (101 MHz, CDCl<sub>3</sub>) of **24**

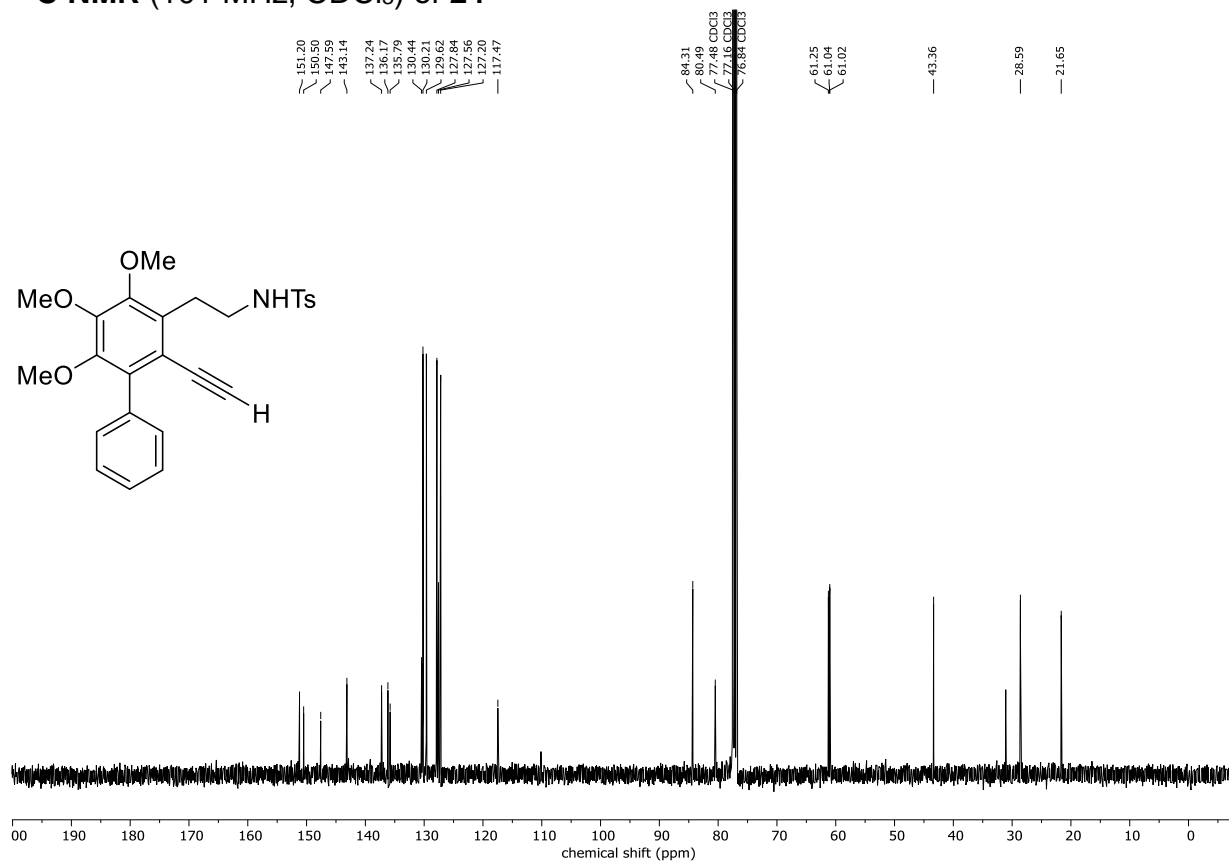

# <sup>1</sup>H NMR (400 MHz, CDCl<sub>3</sub>) of 25

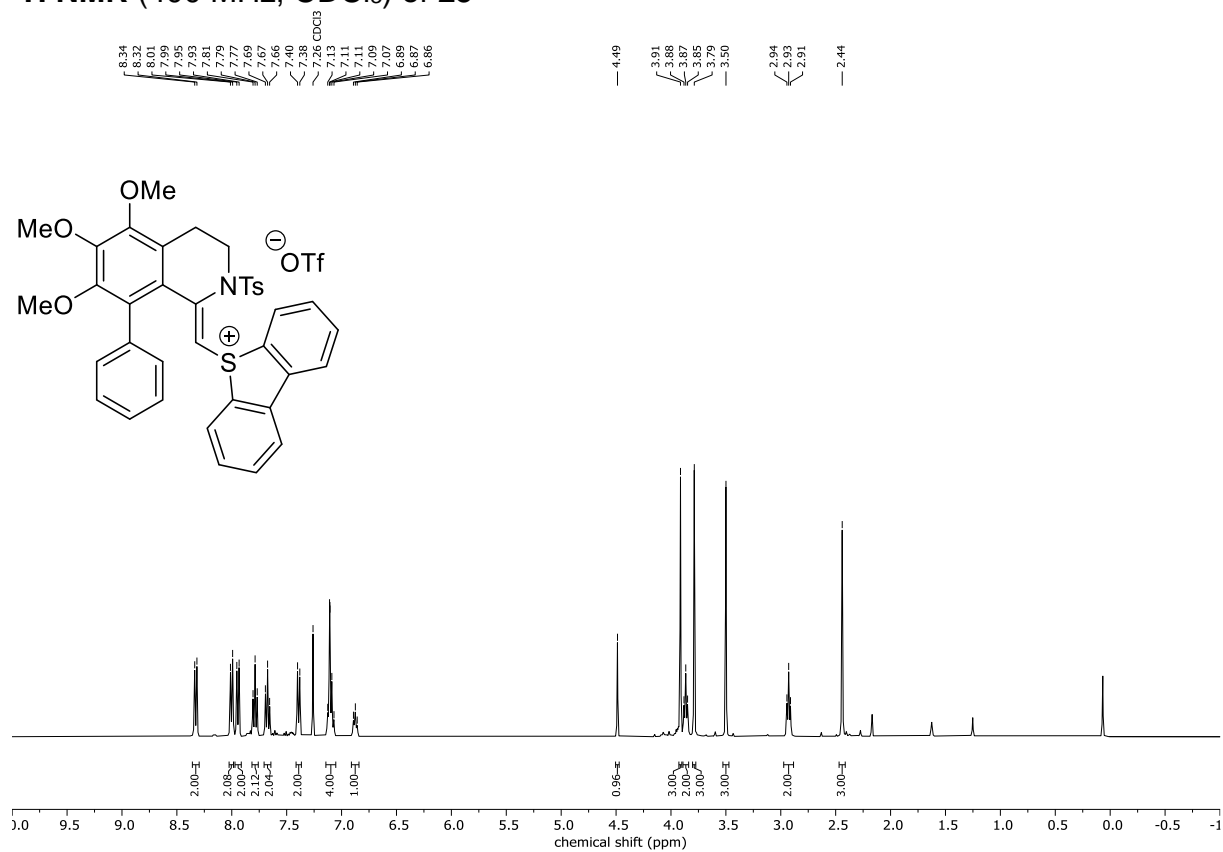

# <sup>13</sup>C NMR (101 MHz, CDCl<sub>3</sub>) of 25

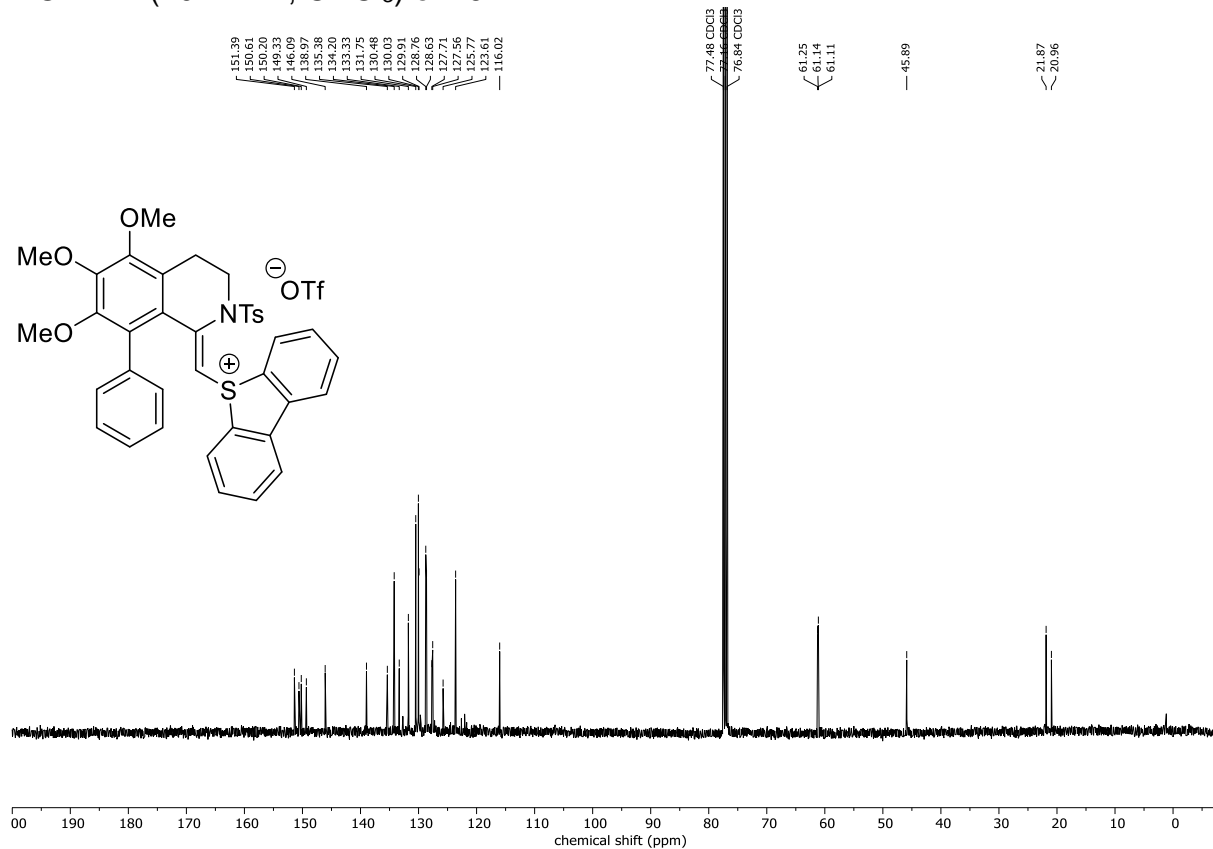

# <sup>1</sup>H NMR (400 MHz, CDCl<sub>3</sub>) of 26

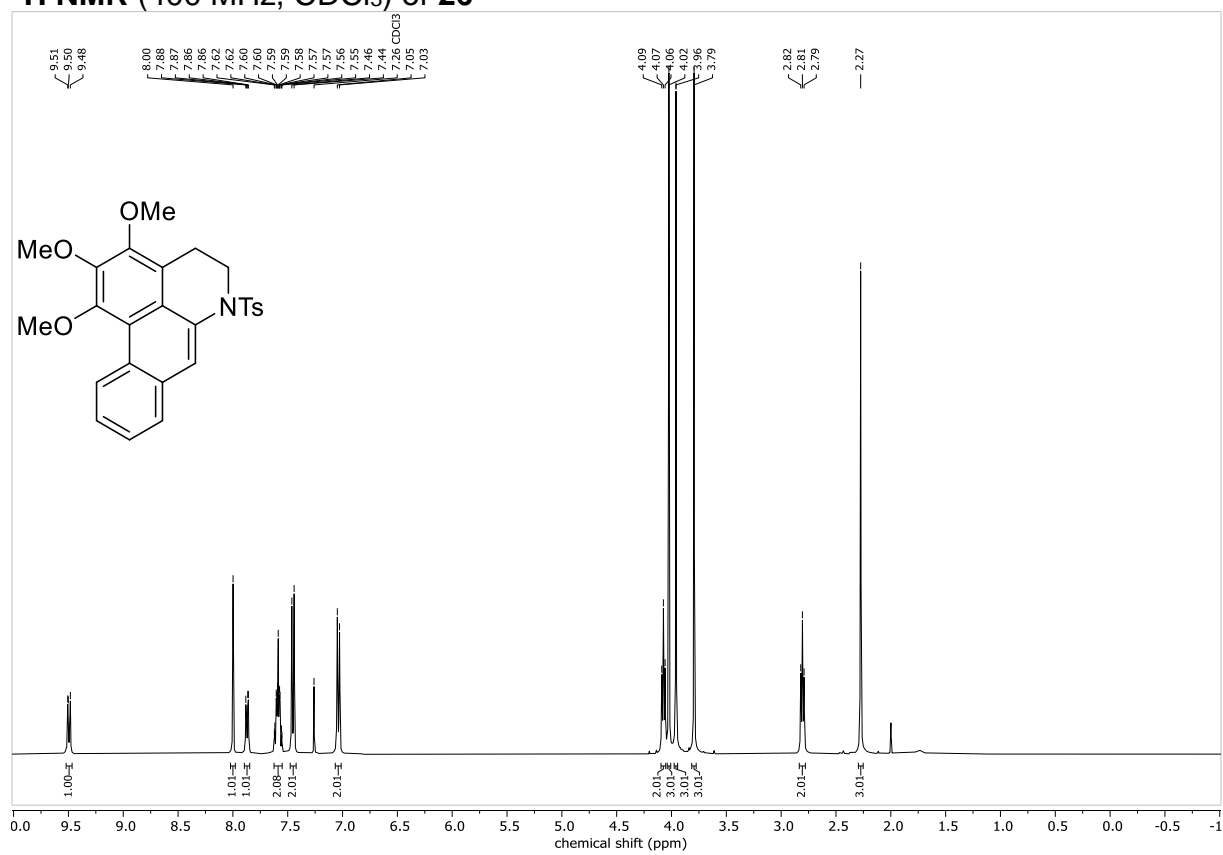

# <sup>13</sup>C NMR (101 MHz, CDCl<sub>3</sub>) of 26

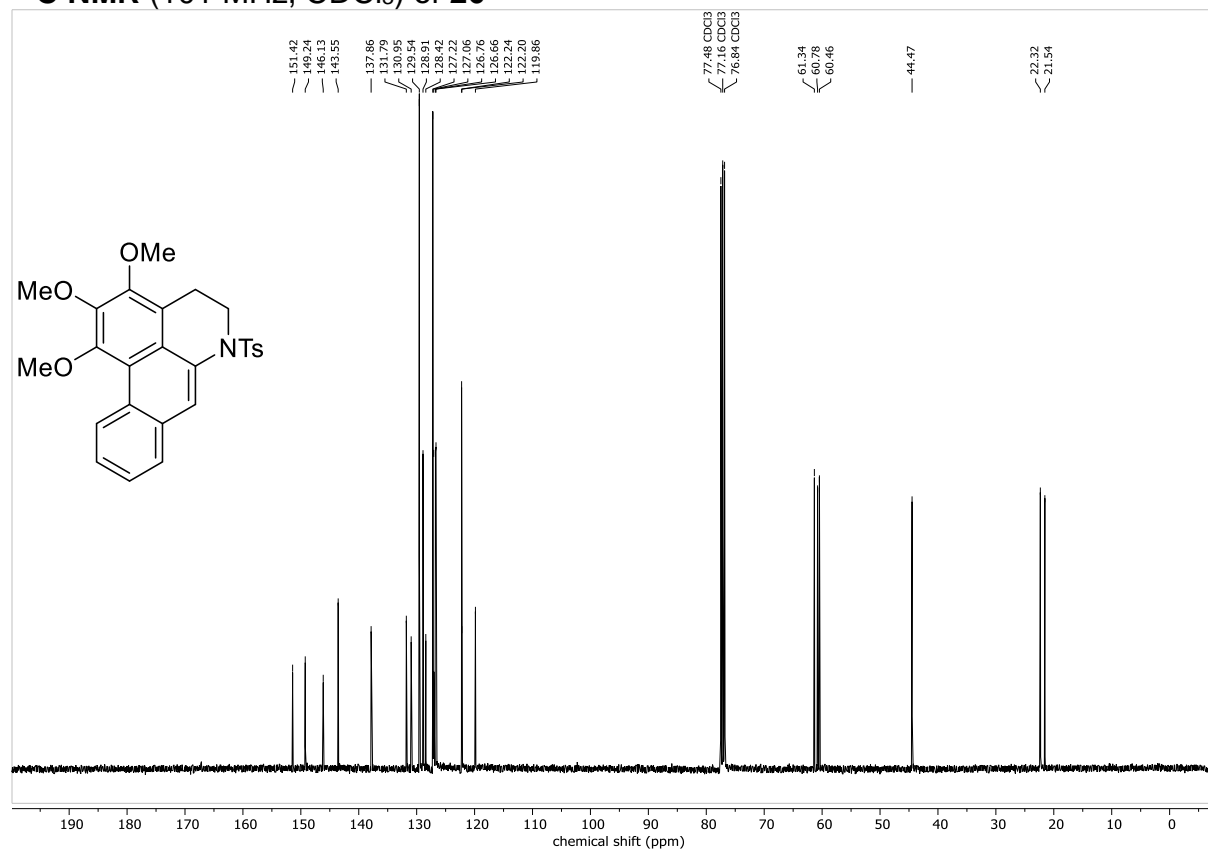

# <sup>1</sup>H NMR (600 MHz, CDCl<sub>3</sub>) of 27

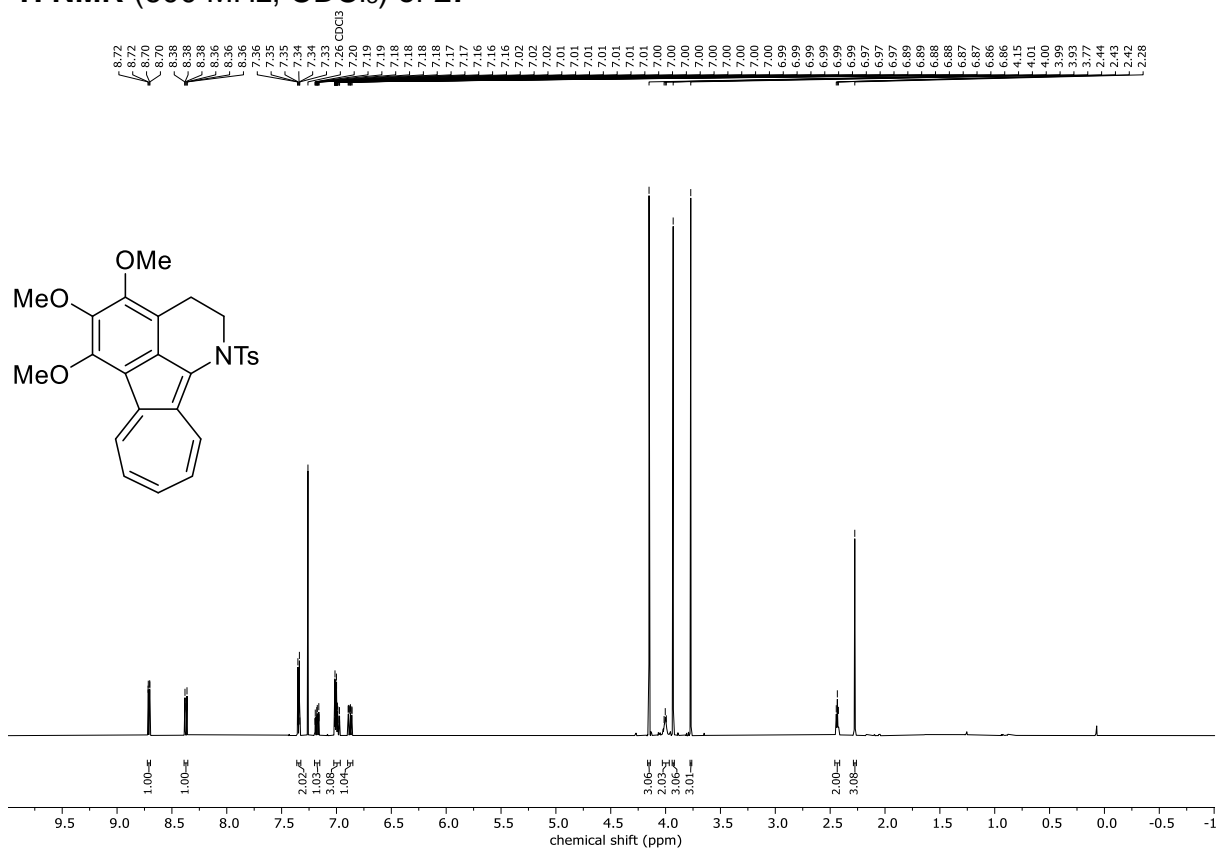

# <sup>13</sup>C NMR (126 MHz, CDCl<sub>3</sub>) of 27

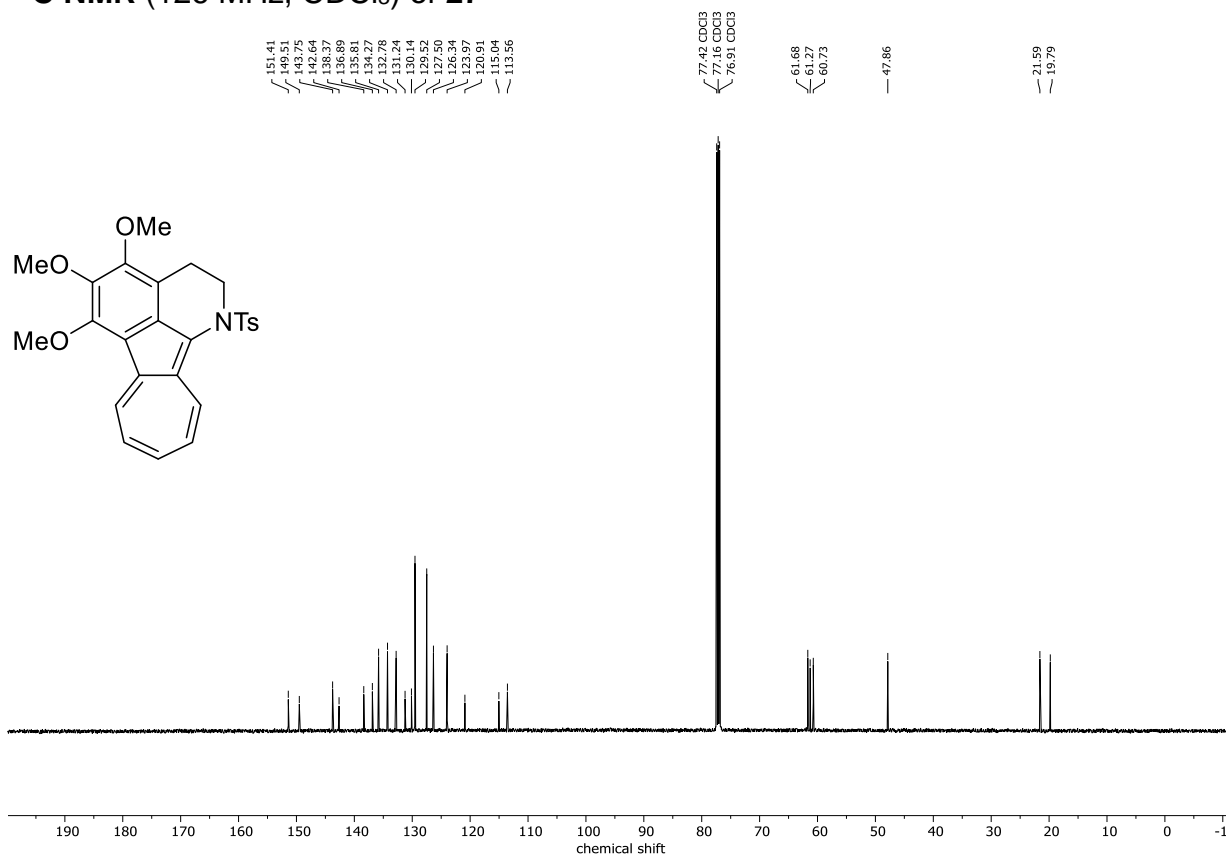



### 3 X-Ray crystal structures

#### Compound 2f:

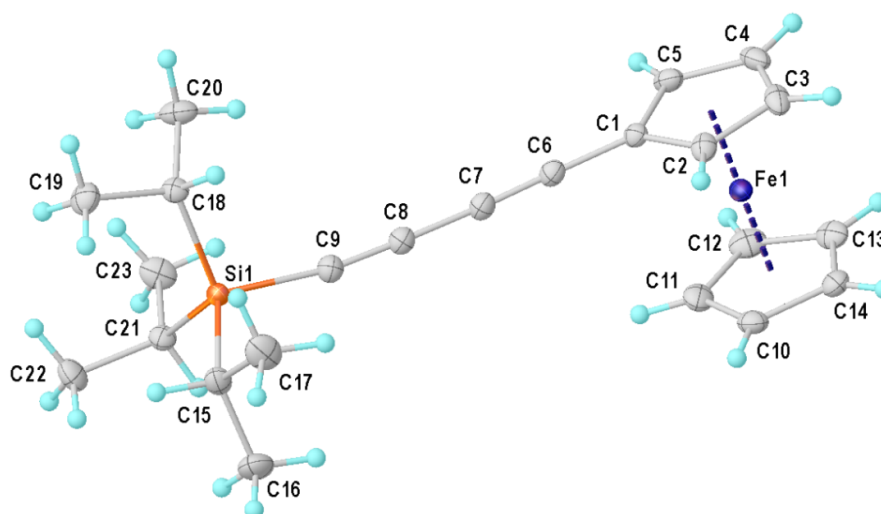

Figure 1: Molecular structure of full asymmetric unit and numbering scheme of compound 2f. Ellipsoids drawn at 50% probability level.

Table 1: Crystal data and structure refinement for 2f.

|                                                              |                                                                              |
|--------------------------------------------------------------|------------------------------------------------------------------------------|
| CCDC                                                         | 2068276                                                                      |
| Empirical formula                                            | C <sub>23</sub> H <sub>30</sub> FeSi                                         |
| Formula weight                                               | 390.41                                                                       |
| Temperature/K                                                | 100                                                                          |
| Crystal system                                               | Triclinic                                                                    |
| Space group                                                  | <i>P</i> -1                                                                  |
| <i>a</i> /Å                                                  | 9.2172(6)                                                                    |
| <i>b</i> /Å                                                  | 11.4974(7)                                                                   |
| <i>c</i> /Å                                                  | 11.6210(8)                                                                   |
| $\alpha$ /°                                                  | 104.064(2)                                                                   |
| $\beta$ /°                                                   | 108.843(2)                                                                   |
| $\gamma$ /°                                                  | 106.313(2)                                                                   |
| Volume/Å <sup>3</sup>                                        | 1040.36(12)                                                                  |
| <i>Z</i>                                                     | 2                                                                            |
| $\rho_{\text{calc}}$ g/cm <sup>3</sup>                       | 1.246                                                                        |
| $\mu$ /mm <sup>-1</sup>                                      | 0.785                                                                        |
| <i>F</i> (000)                                               | 416.0                                                                        |
| Crystal size/mm <sup>3</sup>                                 | 0.334 × 0.322 × 0.196                                                        |
| Radiation                                                    | MoK $\alpha$ ( $\lambda$ = 0.71073)                                          |
| 2 $\theta$ range for data collection/°                       | 4.472 to 61.126                                                              |
| Index ranges                                                 | -13 ≤ <i>h</i> ≤ 13, -16 ≤ <i>k</i> ≤ 16, -16 ≤ <i>l</i> ≤ 16                |
| Reflections collected                                        | 49311                                                                        |
| Independent reflections                                      | 6348 [ <i>R</i> <sub>int</sub> = 0.0307, <i>R</i> <sub>sigma</sub> = 0.0151] |
| Data/restraints/parameters                                   | 6348/0/232                                                                   |
| Goodness-of-fit on <i>F</i> <sup>2</sup>                     | 1.055                                                                        |
| Final <i>R</i> indexes [ <i>I</i> ≥ 2 $\sigma$ ( <i>I</i> )] | <i>R</i> <sub>1</sub> = 0.0227, <i>wR</i> <sub>2</sub> = 0.0599              |
| Final <i>R</i> indexes [all data]                            | <i>R</i> <sub>1</sub> = 0.0256, <i>wR</i> <sub>2</sub> = 0.0619              |
| Largest diff. peak/hole / e Å <sup>-3</sup>                  | 0.40/-0.29                                                                   |

Compound 2j:

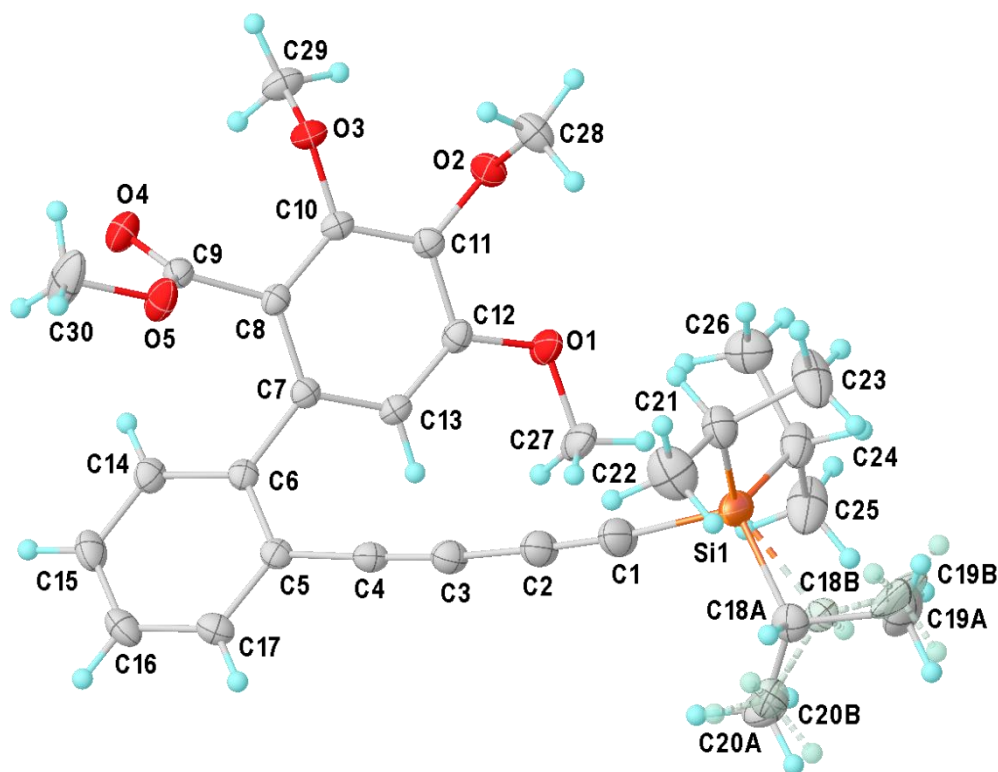

Figure 2: Molecular structure of full asymmetric unit and numbering scheme of compound 2j. Ellipsoids drawn at 50% probability level; minor part of disorder drawn translucent with stippled cones.

Table 2: Crystal data and structure refinement for 2j.

|                                        |                                                               |
|----------------------------------------|---------------------------------------------------------------|
| CCDC                                   | 2068277                                                       |
| Empirical formula                      | C <sub>30</sub> H <sub>38</sub> O <sub>5</sub> Si             |
| Formula weight                         | 506.69                                                        |
| Temperature/K                          | 100.                                                          |
| Crystal system                         | Monoclinic                                                    |
| Space group                            | <i>P2<sub>1</sub>/c</i>                                       |
| <i>a</i> /Å                            | 16.2204(17)                                                   |
| <i>b</i> /Å                            | 17.1259(18)                                                   |
| <i>c</i> /Å                            | 10.4293(9)                                                    |
| <i>α</i> /°                            | 90                                                            |
| <i>β</i> /°                            | 101.021(4)                                                    |
| <i>γ</i> /°                            | 90                                                            |
| Volume/Å <sup>3</sup>                  | 2843.7(5)                                                     |
| <i>Z</i>                               | 4                                                             |
| $\rho_{\text{calc}}$ /cm <sup>3</sup>  | 1.183                                                         |
| $\mu$ /mm <sup>-1</sup>                | 0.118                                                         |
| <i>F</i> (000)                         | 1088.0                                                        |
| Crystal size/mm <sup>3</sup>           | 0.682 × 0.595 × 0.482                                         |
| Radiation                              | MoK $\alpha$ ( $\lambda$ = 0.71073)                           |
| 2 $\theta$ range for data collection/° | 4.756 to 57.462                                               |
| Index ranges                           | -21 ≤ <i>h</i> ≤ 21, -23 ≤ <i>k</i> ≤ 23, -14 ≤ <i>l</i> ≤ 12 |

|                                                |                                                                  |
|------------------------------------------------|------------------------------------------------------------------|
| Reflections collected                          | 52337                                                            |
| Independent reflections                        | 7342 [ $R_{\text{int}} = 0.0263$ , $R_{\text{sigma}} = 0.0163$ ] |
| Data/restraints/parameters                     | 7342/0/365                                                       |
| Goodness-of-fit on $F^2$                       | 1.021                                                            |
| Final $R$ indexes [ $\geq 2\sigma$ ( $I$ )]    | $R_1 = 0.0451$ , $wR_2 = 0.1094$                                 |
| Final $R$ indexes [all data]                   | $R_1 = 0.0497$ , $wR_2 = 0.1131$                                 |
| Largest diff. peak/hole / $e \text{ \AA}^{-3}$ | 0.91/-1.10                                                       |

### Compound 3e:

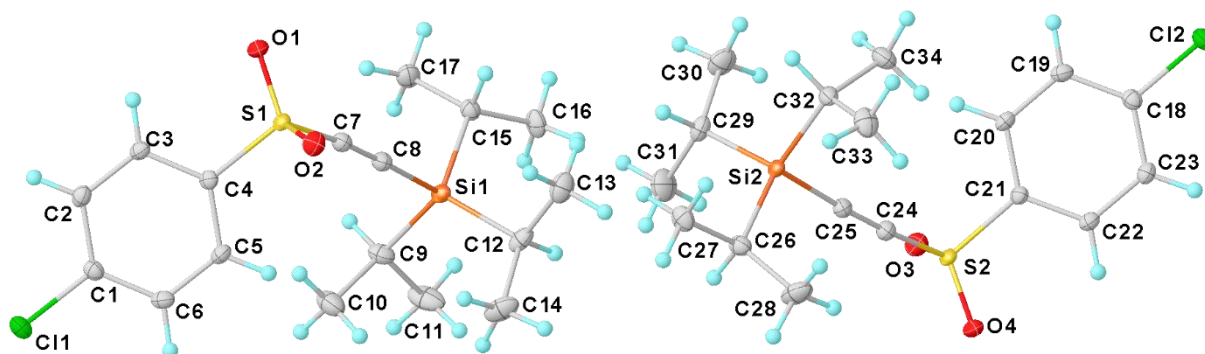

Figure 3: Molecular structure of full asymmetric unit and numbering scheme of compound 3e. Ellipsoids drawn at 50% probability level.

Table 3: Crystal data and structure refinement for 3e.

|                                                              |                                                                              |
|--------------------------------------------------------------|------------------------------------------------------------------------------|
| CCDC                                                         | 2068278                                                                      |
| Empirical formula                                            | C <sub>17</sub> H <sub>25</sub> ClO <sub>2</sub> SSi                         |
| Formula weight                                               | 356.97                                                                       |
| Temperature/K                                                | 100                                                                          |
| Crystal system                                               | Triclinic                                                                    |
| Space group                                                  | <i>P</i> -1                                                                  |
| <i>a</i> /Å                                                  | 11.080(3)                                                                    |
| <i>b</i> /Å                                                  | 11.614(3)                                                                    |
| <i>c</i> /Å                                                  | 15.962(4)                                                                    |
| $\alpha$ /°                                                  | 85.015(7)                                                                    |
| $\beta$ /°                                                   | 80.704(7)                                                                    |
| $\gamma$ /°                                                  | 67.483(6)                                                                    |
| Volume/Å <sup>3</sup>                                        | 1871.8(8)                                                                    |
| <i>Z</i>                                                     | 4                                                                            |
| $\rho_{\text{calc}}$ /cm <sup>3</sup>                        | 1.267                                                                        |
| $\mu$ /mm <sup>-1</sup>                                      | 0.384                                                                        |
| <i>F</i> (000)                                               | 760.0                                                                        |
| Crystal size/mm <sup>3</sup>                                 | 0.465 × 0.264 × 0.158                                                        |
| Radiation                                                    | MoK $\alpha$ ( $\lambda$ = 0.71073)                                          |
| 2 $\theta$ range for data collection/°                       | 3.798 to 57.558                                                              |
| Index ranges                                                 | -14 ≤ <i>h</i> ≤ 14, -15 ≤ <i>k</i> ≤ 15, -21 ≤ <i>l</i> ≤ 21                |
| Reflections collected                                        | 40097                                                                        |
| Independent reflections                                      | 9499 [ <i>R</i> <sub>int</sub> = 0.0278, <i>R</i> <sub>sigma</sub> = 0.0257] |
| Data/restraints/parameters                                   | 9499/0/409                                                                   |
| Goodness-of-fit on <i>F</i> <sup>2</sup>                     | 1.106                                                                        |
| Final <i>R</i> indexes [ <i>I</i> ≥ 2 $\sigma$ ( <i>I</i> )] | <i>R</i> <sub>1</sub> = 0.0365, <i>wR</i> <sub>2</sub> = 0.0841              |
| Final <i>R</i> indexes [all data]                            | <i>R</i> <sub>1</sub> = 0.0422, <i>wR</i> <sub>2</sub> = 0.0869              |
| Largest diff. peak/hole / e Å <sup>-3</sup>                  | 0.45/−0.55                                                                   |

Compound 5a:

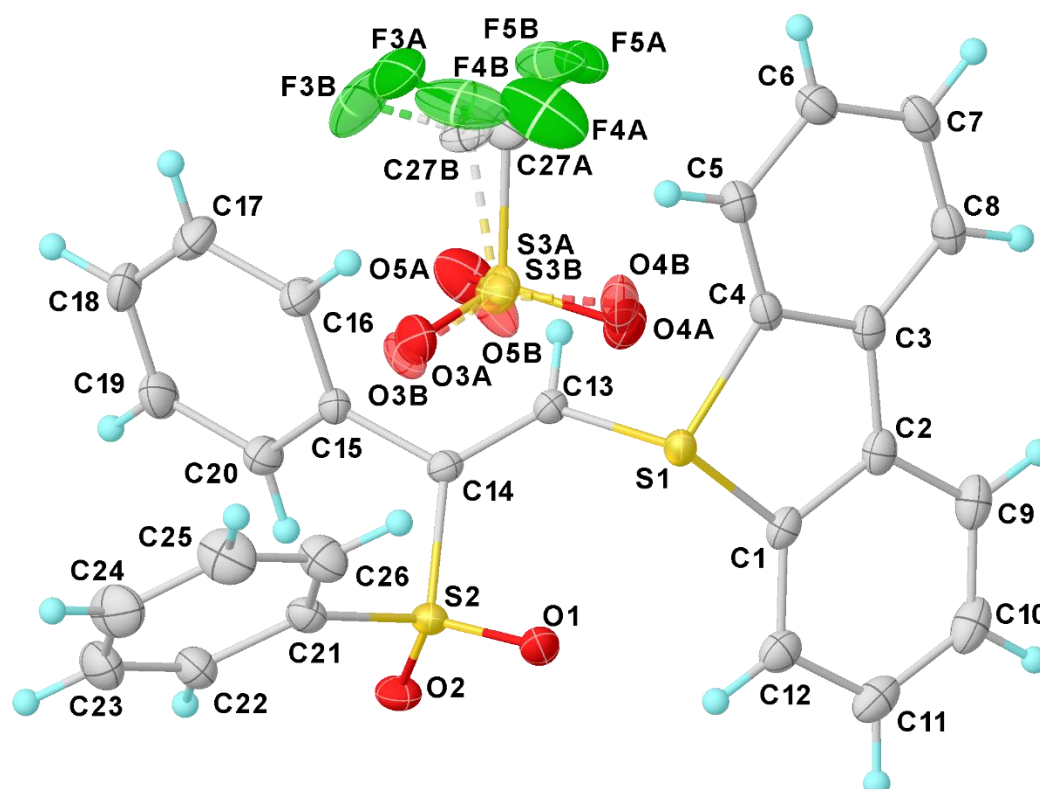

Figure 4: Molecular structure of full asymmetric unit and numbering scheme of compound 5a. Ellipsoids drawn at 50% probability level; minor part of disorder drawn translucent with stippled cones.

Table 4: Crystal data and structure refinement for 5a.

|                                        |                                                                              |
|----------------------------------------|------------------------------------------------------------------------------|
| CCDC                                   | 2068279                                                                      |
| Empirical formula                      | C <sub>27</sub> H <sub>19</sub> F <sub>3</sub> O <sub>5</sub> S <sub>3</sub> |
| Formula weight                         | 576.60                                                                       |
| Temperature/K                          | 100                                                                          |
| Crystal system                         | Monoclinic                                                                   |
| Space group                            | <i>P</i> 2 <sub>1</sub> / <i>c</i>                                           |
| <i>a</i> /Å                            | 15.815(2)                                                                    |
| <i>b</i> /Å                            | 14.4185(16)                                                                  |
| <i>c</i> /Å                            | 11.1988(14)                                                                  |
| <i>α</i> /°                            | 90                                                                           |
| <i>β</i> /°                            | 92.768(4)                                                                    |
| <i>γ</i> /°                            | 90                                                                           |
| Volume/Å <sup>3</sup>                  | 2550.7(5)                                                                    |
| <i>Z</i>                               | 4                                                                            |
| $\rho_{\text{calc}}/\text{cm}^3$       | 1.501                                                                        |
| $\mu/\text{mm}^{-1}$                   | 0.351                                                                        |
| <i>F</i> (000)                         | 1184.0                                                                       |
| Crystal size/mm <sup>3</sup>           | 0.164 × 0.152 × 0.14                                                         |
| Radiation                              | MoK $\alpha$ ( $\lambda$ = 0.71073)                                          |
| 2 $\theta$ range for data collection/° | 4.608 to 57.466                                                              |
| Index ranges                           | -21 ≤ <i>h</i> ≤ 21, -19 ≤ <i>k</i> ≤ 19, -15 ≤ <i>l</i> ≤ 15                |

|                                                |                                                                  |
|------------------------------------------------|------------------------------------------------------------------|
| Reflections collected                          | 121187                                                           |
| Independent reflections                        | 6605 [ $R_{\text{int}} = 0.0252$ , $R_{\text{sigma}} = 0.0094$ ] |
| Data/restraints/parameters                     | 6605/131/419                                                     |
| Goodness-of-fit on $F^2$                       | 1.050                                                            |
| Final $R$ indexes [ $\geq 2\sigma(I)$ ]        | $R_1 = 0.0304$ , $wR_2 = 0.0787$                                 |
| Final $R$ indexes [all data]                   | $R_1 = 0.0335$ , $wR_2 = 0.0814$                                 |
| Largest diff. peak/hole / $e \text{ \AA}^{-3}$ | 0.42/-0.33                                                       |

Compound 6:

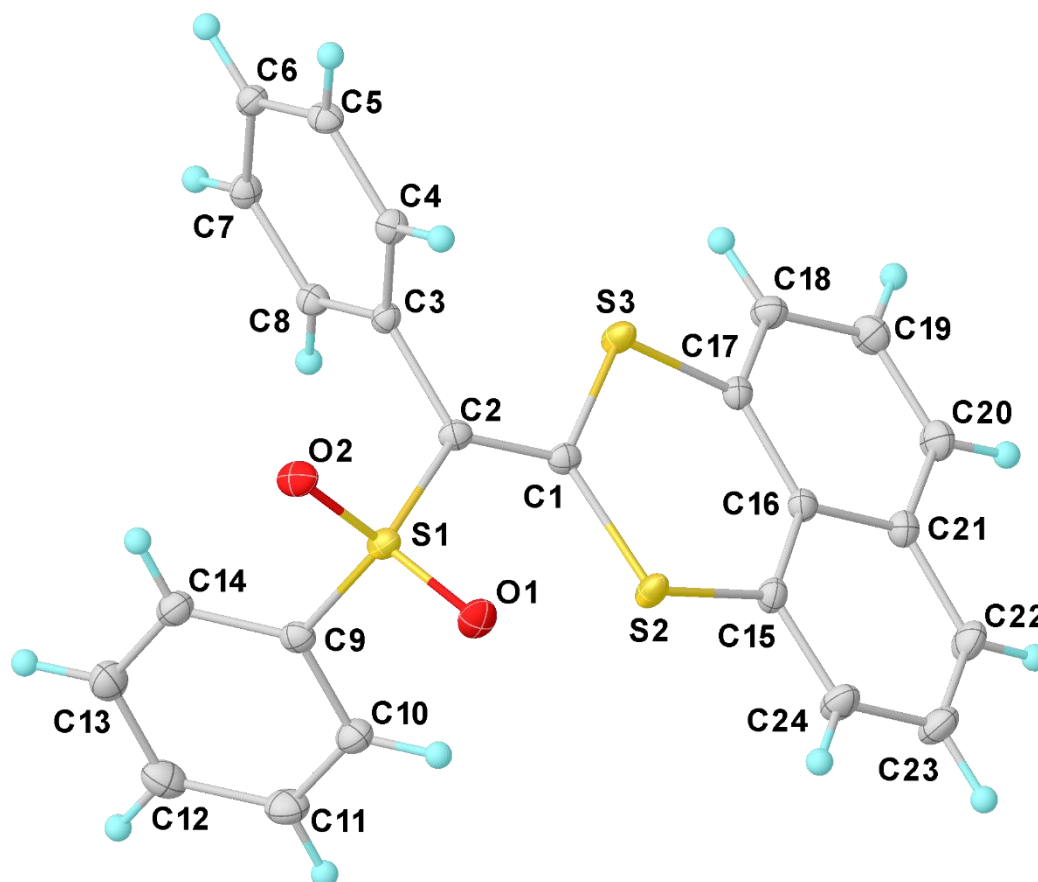

Figure 5: Molecular structure of full asymmetric unit and numbering scheme of compound 6. Ellipsoids drawn at 50% probability level.

Table 5: Crystal data and structure refinement for 6.

|                                  |                                                               |
|----------------------------------|---------------------------------------------------------------|
| CCDC                             | 2068280                                                       |
| Empirical formula                | C <sub>24</sub> H <sub>16</sub> O <sub>2</sub> S <sub>3</sub> |
| Formula weight                   | 432.55                                                        |
| Temperature/K                    | 100                                                           |
| Crystal system                   | Monoclinic                                                    |
| Space group                      | <i>P</i> 2 <sub>1</sub> / <i>c</i>                            |
| <i>a</i> /Å                      | 14.492(2)                                                     |
| <i>b</i> /Å                      | 5.4785(10)                                                    |
| <i>c</i> /Å                      | 23.842(4)                                                     |
| <i>α</i> /°                      | 90                                                            |
| <i>β</i> /°                      | 94.389(5)                                                     |
| <i>γ</i> /°                      | 90                                                            |
| Volume/Å <sup>3</sup>            | 1887.3(5)                                                     |
| <i>Z</i>                         | 4                                                             |
| $\rho_{\text{calc}}/\text{cm}^3$ | 1.522                                                         |
| $\mu/\text{mm}^{-1}$             | 0.413                                                         |
| <i>F</i> (000)                   | 896.0                                                         |
| Crystal size/mm <sup>3</sup>     | 0.256 × 0.097 × 0.074                                         |
| Radiation                        | MoK $\alpha$ ( $\lambda$ = 0.71073)                           |

|                                                  |                                                                      |
|--------------------------------------------------|----------------------------------------------------------------------|
| 2 $\theta$ range for data collection/ $^{\circ}$ | 4.268 to 57.468                                                      |
| Index ranges                                     | -19 $\leq$ h $\leq$ 19, -7 $\leq$ k $\leq$ 7, -32 $\leq$ l $\leq$ 32 |
| Reflections collected                            | 46896                                                                |
| Independent reflections                          | 4899 [ $R_{\text{int}} = 0.0395$ , $R_{\text{sigma}} = 0.0194$ ]     |
| Data/restraints/parameters                       | 4899/0/262                                                           |
| Goodness-of-fit on $F^2$                         | 1.036                                                                |
| Final $R$ indexes [ $\geq 2\sigma$ ( $I$ )]      | $R_1 = 0.0292$ , $wR_2 = 0.0746$                                     |
| Final $R$ indexes [all data]                     | $R_1 = 0.0351$ , $wR_2 = 0.0793$                                     |
| Largest diff. peak/hole / e $\text{\AA}^{-3}$    | 0.38/-0.40                                                           |



Compound 8:

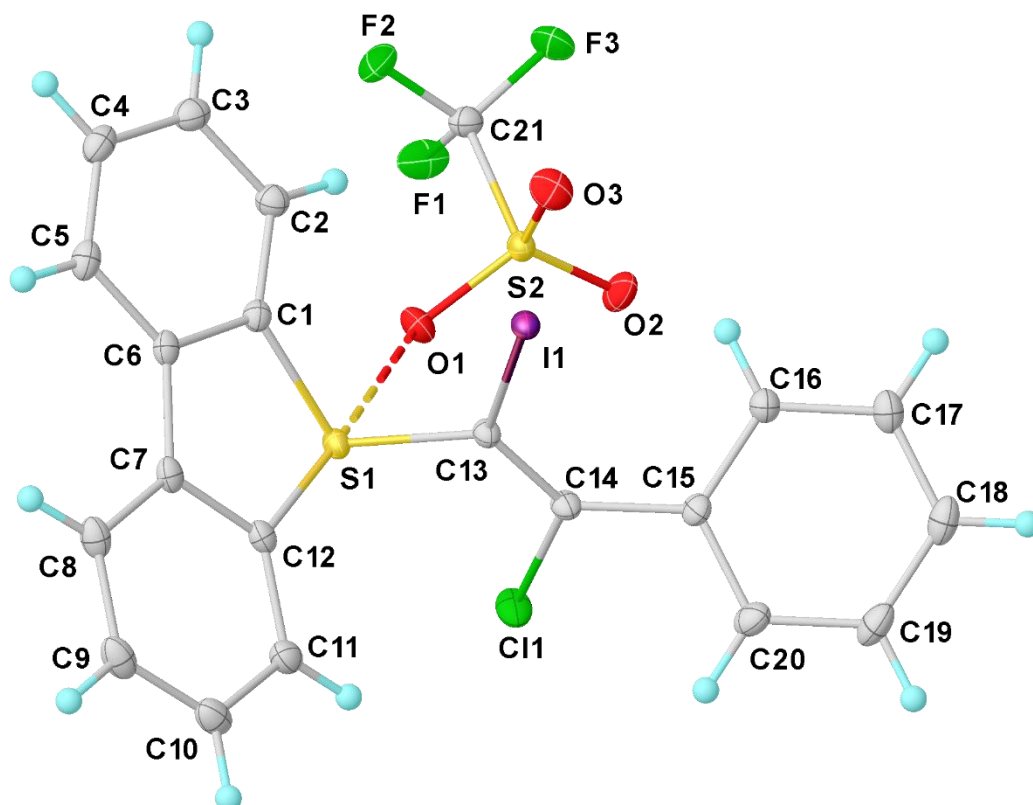

Figure 6: Molecular structure of full asymmetric unit and numbering scheme of compound 8. Ellipsoids drawn at 50% probability level. Stippled cone bond indicates chalcogenic interaction between O1 and S1 [2.995(1) Å].

Table 6: Crystal data and structure refinement for 8.

|                                        |                                                                                 |
|----------------------------------------|---------------------------------------------------------------------------------|
| CCDC                                   | 2068281                                                                         |
| Empirical formula                      | C <sub>21</sub> H <sub>13</sub> ClF <sub>3</sub> IO <sub>3</sub> S <sub>2</sub> |
| Formula weight                         | 596.78                                                                          |
| Temperature/K                          | 100                                                                             |
| Crystal system                         | Monoclinic                                                                      |
| Space group                            | <i>P</i> 2 <sub>1</sub> / <i>c</i>                                              |
| <i>a</i> /Å                            | 7.6018(4)                                                                       |
| <i>b</i> /Å                            | 17.2223(6)                                                                      |
| <i>c</i> /Å                            | 16.2066(8)                                                                      |
| <i>α</i> /°                            | 90                                                                              |
| <i>β</i> /°                            | 101.823(2)                                                                      |
| <i>γ</i> /°                            | 90                                                                              |
| Volume/Å <sup>3</sup>                  | 2076.76(17)                                                                     |
| <i>Z</i>                               | 4                                                                               |
| $\rho_{\text{calc}}$ /cm <sup>3</sup>  | 1.909                                                                           |
| $\mu$ /mm <sup>-1</sup>                | 1.014                                                                           |
| <i>F</i> (000)                         | 1168.0                                                                          |
| Crystal size/mm <sup>3</sup>           | 0.326 × 0.258 × 0.243                                                           |
| Radiation                              | AgK $\alpha$ ( $\lambda$ = 0.56086)                                             |
| 2 $\theta$ range for data collection/° | 4.248 to 55.754                                                                 |

|                                                |                                                                |
|------------------------------------------------|----------------------------------------------------------------|
| Index ranges                                   | $-12 \leq h \leq 12, -28 \leq k \leq 28, -26 \leq l \leq 26$   |
| Reflections collected                          | 225496                                                         |
| Independent reflections                        | 10073 [ $R_{\text{int}} = 0.0347, R_{\text{sigma}} = 0.0115$ ] |
| Data/restraints/parameters                     | 10073/0/280                                                    |
| Goodness-of-fit on $F^2$                       | 1.068                                                          |
| Final $R$ indexes [ $\geq 2\sigma(I)$ ]        | $R_1 = 0.0175, wR_2 = 0.0406$                                  |
| Final $R$ indexes [all data]                   | $R_1 = 0.0217, wR_2 = 0.0424$                                  |
| Largest diff. peak/hole / $e \text{ \AA}^{-3}$ | 0.84/-0.64                                                     |

Compound 10:

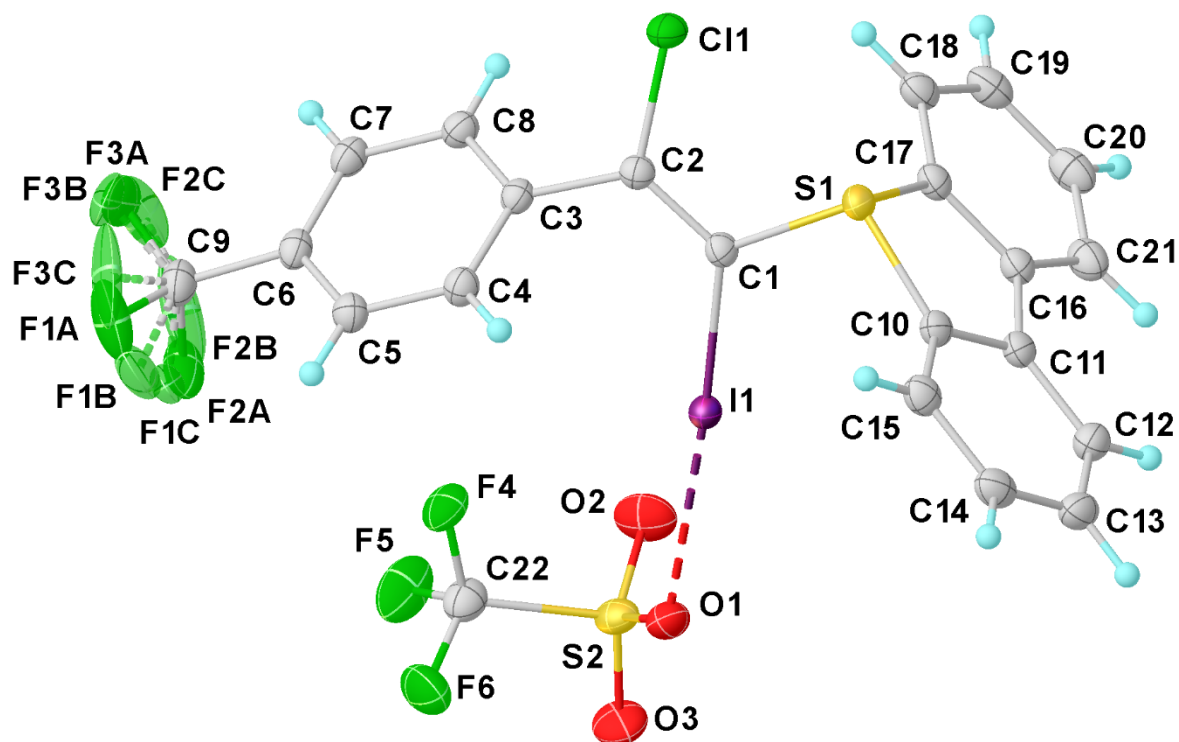

Figure 7: Molecular structure of full asymmetric unit and numbering scheme of compound 10. Ellipsoids drawn at 50% probability level; minor part of disorder drawn translucent with stippled cones. Stippled cone bond indicates halogen bond between O1 and I1 [2.831(1) Å].

Compound 10 was crystallized from a mixture of acetone and diethylether.

Table 7: Crystal data and structure refinement for 10.

|                                       |                                                                                 |
|---------------------------------------|---------------------------------------------------------------------------------|
| CCDC                                  | 2068282                                                                         |
| Empirical formula                     | C <sub>22</sub> H <sub>12</sub> ClF <sub>6</sub> IO <sub>3</sub> S <sub>2</sub> |
| Formula weight                        | 664.79                                                                          |
| Temperature/K                         | 100                                                                             |
| Crystal system                        | Triclinic                                                                       |
| Space group                           | <i>P</i> -1                                                                     |
| <i>a</i> /Å                           | 8.7606(4)                                                                       |
| <i>b</i> /Å                           | 9.1079(5)                                                                       |
| <i>c</i> /Å                           | 14.7027(8)                                                                      |
| $\alpha$ /°                           | 85.481(2)                                                                       |
| $\beta$ /°                            | 87.424(2)                                                                       |
| $\gamma$ /°                           | 79.608(2)                                                                       |
| Volume/Å <sup>3</sup>                 | 1149.74(10)                                                                     |
| <i>Z</i>                              | 2                                                                               |
| $\rho_{\text{calc}}$ /cm <sup>3</sup> | 1.920                                                                           |
| $\mu$ /mm <sup>-1</sup>               | 1.764                                                                           |
| <i>F</i> (000)                        | 648.0                                                                           |
| Crystal size/mm <sup>3</sup>          | 0.333 × 0.197 × 0.052                                                           |
| Radiation                             | MoK $\alpha$ ( $\lambda$ = 0.71073)                                             |

|                                                  |                                                                        |
|--------------------------------------------------|------------------------------------------------------------------------|
| 2 $\theta$ range for data collection/ $^{\circ}$ | 4.558 to 63.196                                                        |
| Index ranges                                     | -12 $\leq$ h $\leq$ 12, -13 $\leq$ k $\leq$ 13, -21 $\leq$ l $\leq$ 21 |
| Reflections collected                            | 102665                                                                 |
| Independent reflections                          | 7675 [ $R_{\text{int}} = 0.0274$ , $R_{\text{sigma}} = 0.0117$ ]       |
| Data/restraints/parameters                       | 7675/10/373                                                            |
| Goodness-of-fit on $F^2$                         | 1.084                                                                  |
| Final $R$ indexes [ $\geq 2\sigma$ ( $I$ )]      | $R_1 = 0.0151$ , $wR_2 = 0.0395$                                       |
| Final $R$ indexes [all data]                     | $R_1 = 0.0159$ , $wR_2 = 0.0400$                                       |
| Largest diff. peak/hole / e $\text{\AA}^{-3}$    | 0.45/-0.55                                                             |

Compound 11:

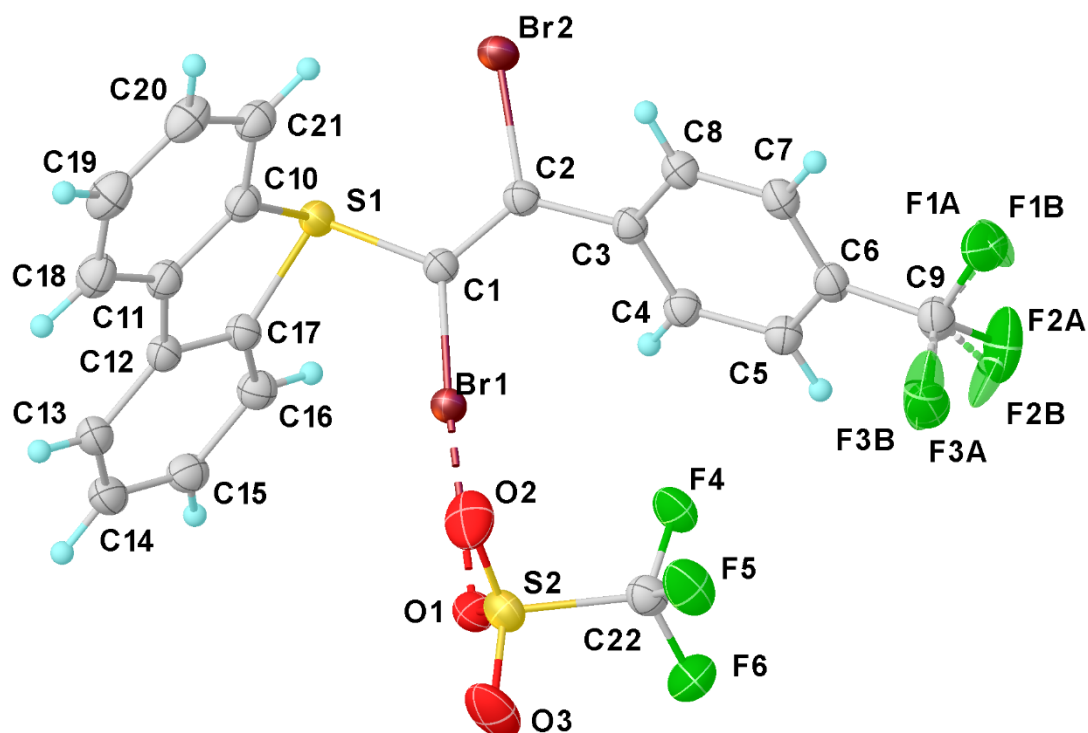

Figure 8: Molecular structure of full asymmetric unit and numbering scheme of compound 11. Ellipsoids drawn at 50% probability level; minor part of disorder drawn translucent with stippled cones. Stippled cone bond indicates halogen bond between O1 and Br1 [2.885(1) Å].

Table 8: Crystal data and structure refinement for 11.

|                                        |                                                                                              |
|----------------------------------------|----------------------------------------------------------------------------------------------|
| CCDC                                   | 2068283                                                                                      |
| Empirical formula                      | C <sub>22</sub> H <sub>12</sub> Br <sub>2</sub> F <sub>6</sub> O <sub>3</sub> S <sub>2</sub> |
| Formula weight                         | 662.26                                                                                       |
| Temperature/K                          | 100                                                                                          |
| Crystal system                         | Triclinic                                                                                    |
| Space group                            | <i>P</i> -1                                                                                  |
| <i>a</i> /Å                            | 8.7933(5)                                                                                    |
| <i>b</i> /Å                            | 8.9573(4)                                                                                    |
| <i>c</i> /Å                            | 14.6326(8)                                                                                   |
| $\alpha$ /°                            | 85.968(2)                                                                                    |
| $\beta$ /°                             | 87.299(2)                                                                                    |
| $\gamma$ /°                            | 80.687(2)                                                                                    |
| Volume/Å <sup>3</sup>                  | 1133.77(10)                                                                                  |
| <i>Z</i>                               | 2                                                                                            |
| $\rho_{\text{calc}}$ /cm <sup>3</sup>  | 1.940                                                                                        |
| $\mu$ /mm <sup>-1</sup>                | 3.833                                                                                        |
| <i>F</i> (000)                         | 648.0                                                                                        |
| Crystal size/mm <sup>3</sup>           | 0.423 × 0.377 × 0.375                                                                        |
| Radiation                              | MoK $\alpha$ ( $\lambda$ = 0.71073)                                                          |
| 2 $\theta$ range for data collection/° | 4.618 to 65.464                                                                              |
| Index ranges                           | -13 ≤ <i>h</i> ≤ 13, -13 ≤ <i>k</i> ≤ 13, -22 ≤ <i>l</i> ≤ 22                                |
| Reflections collected                  | 148044                                                                                       |

|                                                |                                                                  |
|------------------------------------------------|------------------------------------------------------------------|
| Independent reflections                        | 8316 [ $R_{\text{int}} = 0.0313$ , $R_{\text{sigma}} = 0.0160$ ] |
| Data/restraints/parameters                     | 8316/21/344                                                      |
| Goodness-of-fit on $F^2$                       | 1.121                                                            |
| Final $R$ indexes [ $\geq 2\sigma(I)$ ]        | $R_1 = 0.0250$ , $wR_2 = 0.0680$                                 |
| Final $R$ indexes [all data]                   | $R_1 = 0.0254$ , $wR_2 = 0.0683$                                 |
| Largest diff. peak/hole / $e \text{ \AA}^{-3}$ | 0.71/−0.36                                                       |

## Compound 11 with bromide anion:

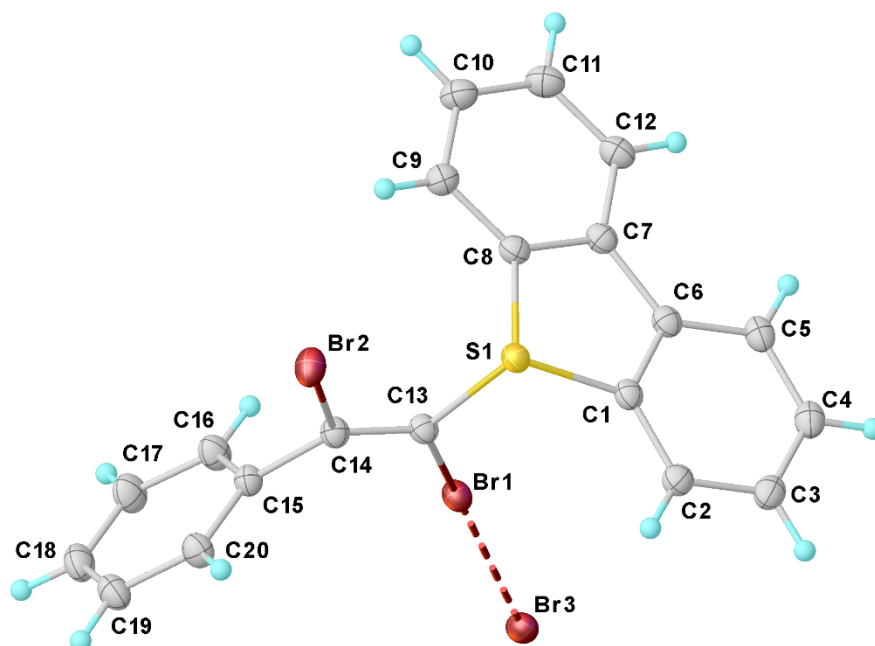

Figure 9: Molecular structure of full asymmetric unit and numbering scheme of compound 11 with bromide anion. Ellipsoids drawn at 50% probability level. Stippled cone bond indicates halogen bond between Br1 and Br3 [3.1900(3) Å].

Small amounts of **11** crystallize with bromide anion, instead of triflate, when bromine was added in slight excess to **1c** (compare scheme 4).

Table 9: Crystal data and structure refinement for **11** with bromide anion.

|                                        |                                                                              |
|----------------------------------------|------------------------------------------------------------------------------|
| CCDC                                   | 2068284                                                                      |
| Empirical formula                      | C <sub>20</sub> H <sub>13</sub> Br <sub>3</sub> S                            |
| Formula weight                         | 525.09                                                                       |
| Temperature/K                          | 100                                                                          |
| Crystal system                         | Monoclinic                                                                   |
| Space group                            | <i>P2<sub>1</sub>/c</i>                                                      |
| <i>a</i> /Å                            | 13.4052(16)                                                                  |
| <i>b</i> /Å                            | 7.3752(8)                                                                    |
| <i>c</i> /Å                            | 18.247(2)                                                                    |
| $\alpha$ /°                            | 90                                                                           |
| $\beta$ /°                             | 91.642(4)                                                                    |
| $\gamma$ /°                            | 90                                                                           |
| Volume/Å <sup>3</sup>                  | 1803.3(4)                                                                    |
| <i>Z</i>                               | 4                                                                            |
| $\rho_{\text{calc}}/\text{cm}^3$       | 1.934                                                                        |
| $\mu/\text{mm}^{-1}$                   | 3.654                                                                        |
| <i>F</i> (000)                         | 1016.0                                                                       |
| Crystal size/mm <sup>3</sup>           | 0.845 × 0.13 × 0.082                                                         |
| Radiation                              | AgK $\alpha$ ( $\lambda$ = 0.56086)                                          |
| 2 $\theta$ range for data collection/° | 4.976 to 53.824                                                              |
| Index ranges                           | -21 ≤ <i>h</i> ≤ 21, -11 ≤ <i>k</i> ≤ 11, -29 ≤ <i>l</i> ≤ 29                |
| Reflections collected                  | 205121                                                                       |
| Independent reflections                | 7919 [ <i>R</i> <sub>int</sub> = 0.0314, <i>R</i> <sub>sigma</sub> = 0.0092] |

|                                                |                                  |
|------------------------------------------------|----------------------------------|
| Data/restraints/parameters                     | 7919/0/217                       |
| Goodness-of-fit on $F^2$                       | 1.069                            |
| Final $R$ indexes [ $\geq 2\sigma(I)$ ]        | $R_1 = 0.0182$ , $wR_2 = 0.0495$ |
| Final $R$ indexes [all data]                   | $R_1 = 0.0199$ , $wR_2 = 0.0507$ |
| Largest diff. peak/hole / $e \text{ \AA}^{-3}$ | 0.99/-0.26                       |



Compound 24:

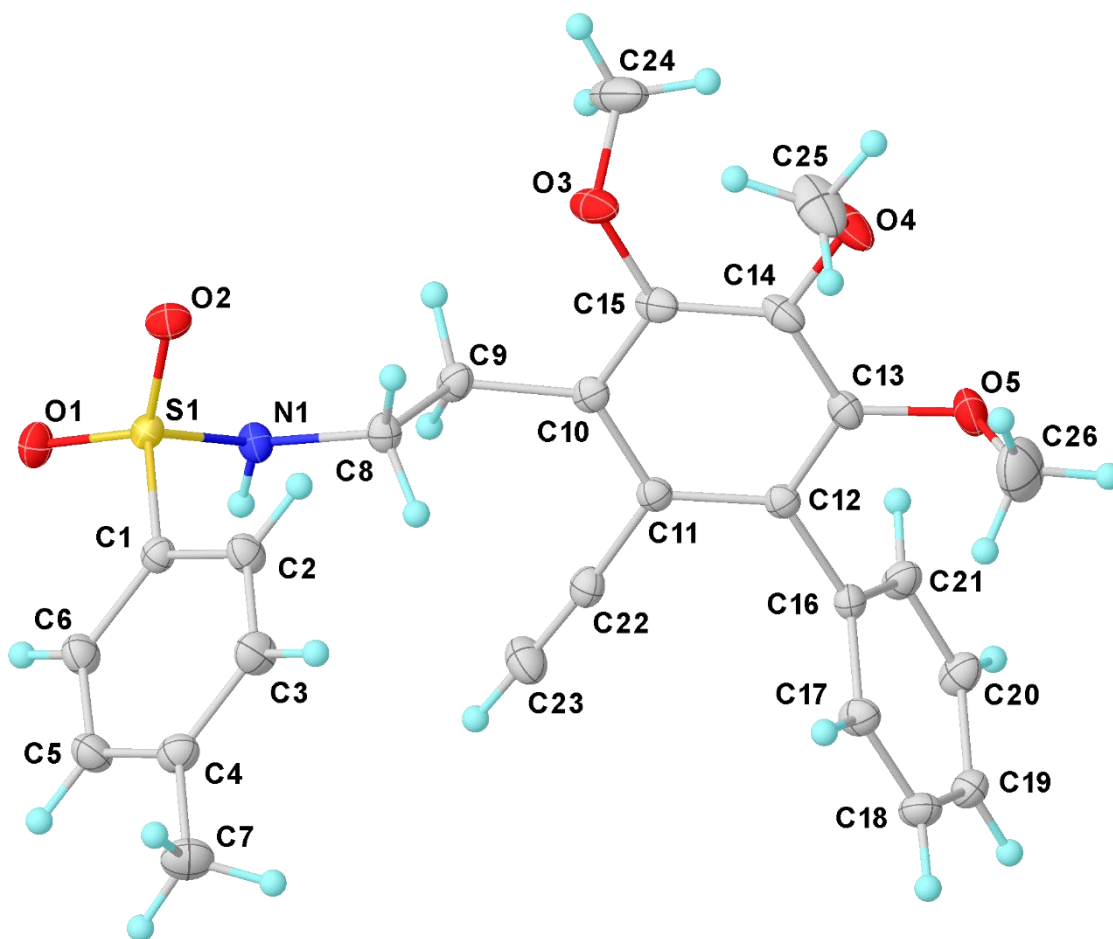

Figure 10: Molecular structure of full asymmetric unit and numbering scheme of compound 24. Ellipsoids drawn at 50% probability level.

Compound **24** was crystallized by simple evaporation from dichloromethane.

Table 10: Crystal data and structure refinement for 24.

|                                       |                                                   |
|---------------------------------------|---------------------------------------------------|
| CCDC                                  | 2068285                                           |
| Empirical formula                     | C <sub>26</sub> H <sub>27</sub> NO <sub>5</sub> S |
| Formula weight                        | 465.54                                            |
| Temperature/K                         | 100                                               |
| Crystal system                        | Orthorhombic                                      |
| Space group                           | <i>Pbca</i>                                       |
| <i>a</i> /Å                           | 19.1173(15)                                       |
| <i>b</i> /Å                           | 9.5367(6)                                         |
| <i>c</i> /Å                           | 26.398(2)                                         |
| $\alpha$ /°                           | 90                                                |
| $\beta$ /°                            | 90                                                |
| $\gamma$ /°                           | 90                                                |
| Volume/Å <sup>3</sup>                 | 4812.9(6)                                         |
| <i>Z</i>                              | 8                                                 |
| $\rho_{\text{calc}}$ /cm <sup>3</sup> | 1.285                                             |
| $\mu$ /mm <sup>-1</sup>               | 0.171                                             |
| <i>F</i> (000)                        | 1968.0                                            |

|                                             |                                                                |
|---------------------------------------------|----------------------------------------------------------------|
| Crystal size/mm <sup>3</sup>                | 0.288 × 0.238 × 0.178                                          |
| Radiation                                   | MoK $\alpha$ ( $\lambda$ = 0.71073)                            |
| 2 $\theta$ range for data collection/°      | 5.016 to 57.408                                                |
| Index ranges                                | -25 ≤ h ≤ 25, -12 ≤ k ≤ 11, -35 ≤ l ≤ 35                       |
| Reflections collected                       | 43314                                                          |
| Independent reflections                     | 6201 [ $R_{\text{int}}$ = 0.0276, $R_{\text{sigma}}$ = 0.0176] |
| Data/restraints/parameters                  | 6201/0/310                                                     |
| Goodness-of-fit on $F^2$                    | 1.051                                                          |
| Final $R$ indexes [ $\geq 2\sigma$ ( $I$ )] | $R_1$ = 0.0356, $wR_2$ = 0.0907                                |
| Final $R$ indexes [all data]                | $R_1$ = 0.0415, $wR_2$ = 0.0950                                |
| Largest diff. peak/hole / e Å <sup>-3</sup> | 0.36/-0.42                                                     |

## Compound 28:

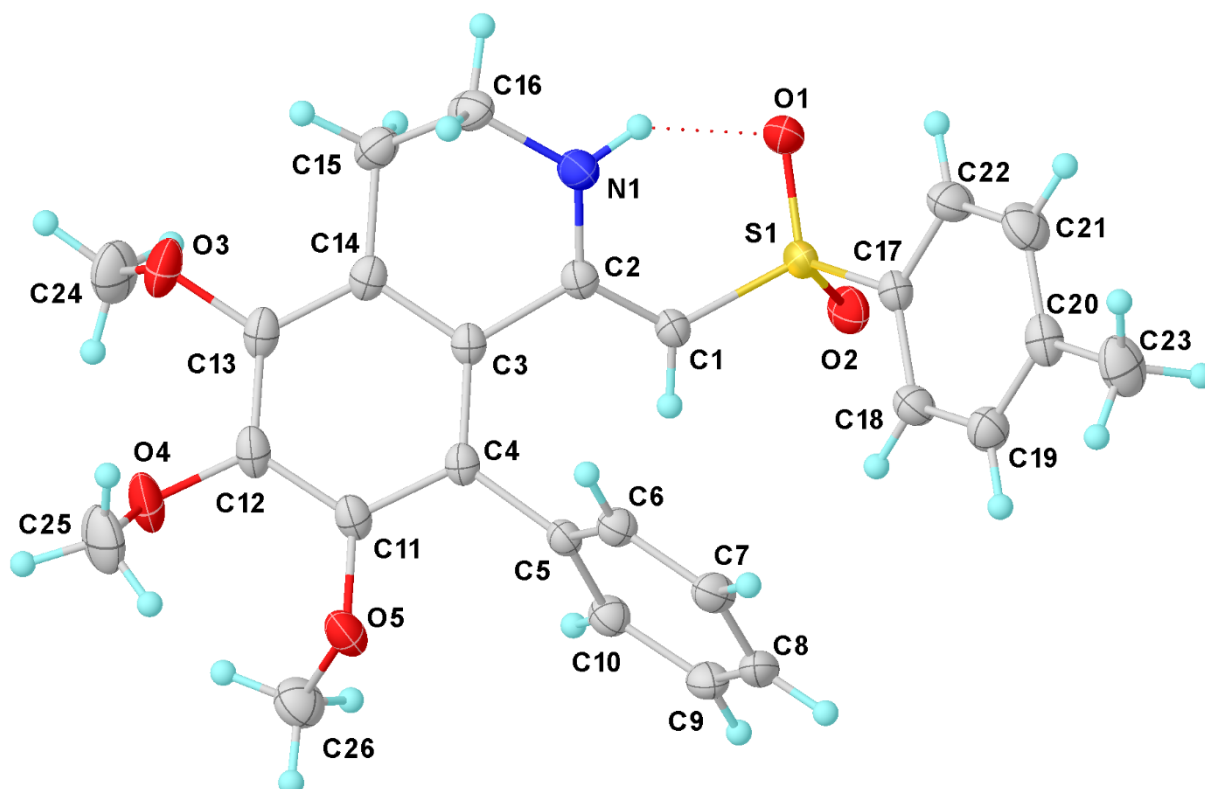

Figure 11: Molecular structure of full asymmetric unit and numbering scheme of compound 28. Ellipsoids drawn at 50% probability level.

Compound **28** crystallizes directly from the crude reaction while trying to charge it to a flash column (mixture of hexane and ethyl acetate as solvent). Twinned yellow block. Non-merohedral twinning was found with the two twin domain transformation matrix (0.999 0.042 0.070 / -0.020 0.981 -0.039 / -0.293 0.072 0.996). Final refinement against hklf5 data with refined batch scale factor of 0.289(2).

Table 11: Crystal data and structure refinement for 28.

|                                       |                                                   |
|---------------------------------------|---------------------------------------------------|
| CCDC                                  | 2068286                                           |
| Empirical formula                     | C <sub>26</sub> H <sub>27</sub> NO <sub>5</sub> S |
| Formula weight                        | 465.54                                            |
| Temperature/K                         | 150                                               |
| Crystal system                        | Triclinic                                         |
| Space group                           | <i>P</i> 1                                        |
| <i>a</i> /Å                           | 5.9594(19)                                        |
| <i>b</i> /Å                           | 7.747(2)                                          |
| <i>c</i> /Å                           | 12.894(4)                                         |
| $\alpha$ /°                           | 103.174(8)                                        |
| $\beta$ /°                            | 91.499(8)                                         |
| $\gamma$ /°                           | 95.991(9)                                         |
| Volume/Å <sup>3</sup>                 | 575.6(3)                                          |
| <i>Z</i>                              | 1                                                 |
| $\rho_{\text{calc}}$ /cm <sup>3</sup> | 1.343                                             |
| $\mu$ /mm <sup>-1</sup>               | 0.179                                             |

|                                             |                                                           |
|---------------------------------------------|-----------------------------------------------------------|
| F(000)                                      | 246.0                                                     |
| Crystal size/mm <sup>3</sup>                | 0.33 × 0.246 × 0.094                                      |
| Radiation                                   | MoK $\alpha$ ( $\lambda$ = 0.71073)                       |
| 2 $\theta$ range for data collection/°      | 6.5 to 57.592                                             |
| Index ranges                                | -8 ≤ h ≤ 8, -10 ≤ k ≤ 10, -17 ≤ l ≤ 17                    |
| Reflections collected                       | 5911                                                      |
| Independent reflections                     | 5911 [ $R_{\text{int}}$ = ?, $R_{\text{sigma}}$ = 0.0137] |
| Data/restraints/parameters                  | 5911/3/311                                                |
| Goodness-of-fit on F <sup>2</sup>           | 1.074                                                     |
| Final $R$ indexes [ $\geq 2\sigma$ ( $I$ )] | $R_1$ = 0.0269, $wR_2$ = 0.0733                           |
| Final $R$ indexes [all data]                | $R_1$ = 0.0272, $wR_2$ = 0.0739                           |
| Largest diff. peak/hole / e Å <sup>-3</sup> | 0.21/-0.17                                                |
| Flack parameter                             | -0.005(14)                                                |

---

## 4 References

- [1] B. Waldecker, F. Kraft, C. Golz, M. Alcarazo, M. *Angew. Chem. Int. Ed.* **2018**, *57*, 12538–12542.
- [2] B. Waldecker, K. Kafuta, M. Alcarazo, *Org. Synth.* **2019**, *96*, 258–276.
- [3] G. M. Sheldrick, *Acta Cryst.* **2008**, *A64*, 112–122.
- [4] O. V. Dolomanov, L. J. Bourhis, R. J. Gildea, J. A. K. Howard, H. Puschmann, *J. Appl. Cryst.* **2009**, *42*, 339–341.
- [5] S. Chassaing, A. Alix, T. Boningari, K. Sani Souna Sido, M. Keller, P. Kuhn, B. Louis, J. Sommer, P. Pale, *Synthesis* **2010**, 1557–1567.
- [6] L. Feng, T. Hu, S. Zhang, H.-Y. Xiong, G. Zhang, *Org. Lett.* **2019**, *21*, 9487–9492.
- [7] Benanti, T. L.; Kalaydjian, A.; Venkataraman, D. *Macromolecules* **2008**, *41*(22), 8312–8315.
- [8] R. Sakamoto, S. Kume, H. Nishihara, *Chem. Eur. J.* **2008**, *14*, 6978–6986.
- [9] X. Li, X. Xie, N. Sun, Y. Liu, *Angew. Chem. Int. Ed.* **2017**, *56*, 6994–6998.
- [10] S. Banerjee, N. T. Patil, *Chem. Comm.* **2017**, *53*, 7937–7940.
- [11] K. Azyat, E. Jahnke, T. Rankin, R. R. Tykwinski, *Chem. Comm.* **2009**, *4*, 433.
- [12] T. Luu, R. McDonald, R. R. Tykwinski, *Org. Lett.* **2006**, *8*, 6035–6036.
- [13] Y. Morisaki, T. Luu, R. R. Tykwinski, *Org. Lett.* **2006**, *8*(4), 689.
- [14] P. S. Shinde, N. T. Patil, *Eur. J. Org. Chem.* **2017**, 3512–3515.
- [15] C. C. Chen, C. J. Waser, *Org. Lett.* **2015**, *17*, 736–739.
